# Supplementary material
Source: publisher figshare collection journal article supplement (https://diabetesjournals.figshare.com/ndownloader/files/34172181)
Supplement: Supplementary file 1 [file 34172181]

## Sheet: Adult T2D
Table S6: Association of cis-pQTLs of the MR prioritzed proteins with adult type 2 diabetes with nearby protein altering variants.
SNP	Location	Allele	Consequence	IMPACT	SIFT	PolyPhen	CADD_PHRED	CADD_RAW	cis-pQTL.SNP	R2	Population
rs10083013	12:27784574-27784574	A	intron_variant	MODIFIER	-	-	1.177	-0.026712	MANSC4(rs36138811)	0.394	CEU
rs10083013	12:27784574-27784574	G	intron_variant	MODIFIER	-	-	1.277	-0.00946	MANSC4(rs36138811)	0.394	CEU
rs10083013	12:27784574-27784574	T	intron_variant	MODIFIER	-	-	1.554	0.032812	MANSC4(rs36138811)	0.394	CEU
rs10083013	12:27784574-27784574	A	upstream_gene_variant	MODIFIER	-	-	1.177	-0.026712	MANSC4(rs36138811)	0.394	CEU
rs10083013	12:27784574-27784574	G	upstream_gene_variant	MODIFIER	-	-	1.277	-0.00946	MANSC4(rs36138811)	0.394	CEU
rs10083013	12:27784574-27784574	T	upstream_gene_variant	MODIFIER	-	-	1.554	0.032812	MANSC4(rs36138811)	0.394	CEU
rs10083013	12:27784574-27784574	A	intron_variant,NMD_transcript_variant	MODIFIER	-	-	1.177	-0.026712	MANSC4(rs36138811)	0.394	CEU
rs10083013	12:27784574-27784574	G	intron_variant,NMD_transcript_variant	MODIFIER	-	-	1.277	-0.00946	MANSC4(rs36138811)	0.394	CEU
rs10083013	12:27784574-27784574	T	intron_variant,NMD_transcript_variant	MODIFIER	-	-	1.554	0.032812	MANSC4(rs36138811)	0.394	CEU
rs10083013	12:27784574-27784574	A	intron_variant,non_coding_transcript_variant	MODIFIER	-	-	1.177	-0.026712	MANSC4(rs36138811)	0.394	CEU
rs10083013	12:27784574-27784574	G	intron_variant,non_coding_transcript_variant	MODIFIER	-	-	1.277	-0.00946	MANSC4(rs36138811)	0.394	CEU
rs10083013	12:27784574-27784574	T	intron_variant,non_coding_transcript_variant	MODIFIER	-	-	1.554	0.032812	MANSC4(rs36138811)	0.394	CEU
rs10083013	12:27784574-27784574	A	regulatory_region_variant	MODIFIER	-	-	1.177	-0.026712	MANSC4(rs36138811)	0.394	CEU
rs10083013	12:27784574-27784574	G	regulatory_region_variant	MODIFIER	-	-	1.277	-0.00946	MANSC4(rs36138811)	0.394	CEU
rs10083013	12:27784574-27784574	T	regulatory_region_variant	MODIFIER	-	-	1.554	0.032812	MANSC4(rs36138811)	0.394	CEU
rs11049140	12:27776568-27776568	A	upstream_gene_variant	MODIFIER	-	-	0.888	-0.085637	MANSC4(rs36138811)	1	CEU
rs11049140	12:27776568-27776568	C	upstream_gene_variant	MODIFIER	-	-	0.746	-0.122332	MANSC4(rs36138811)	1	CEU
rs11049140	12:27776568-27776568	T	upstream_gene_variant	MODIFIER	-	-	0.703	-0.13449	MANSC4(rs36138811)	1	CEU
rs11049140	12:27776568-27776568	A	intron_variant	MODIFIER	-	-	0.888	-0.085637	MANSC4(rs36138811)	1	CEU
rs11049140	12:27776568-27776568	C	intron_variant	MODIFIER	-	-	0.746	-0.122332	MANSC4(rs36138811)	1	CEU
rs11049140	12:27776568-27776568	T	intron_variant	MODIFIER	-	-	0.703	-0.13449	MANSC4(rs36138811)	1	CEU
rs11049140	12:27776568-27776568	A	downstream_gene_variant	MODIFIER	-	-	0.888	-0.085637	MANSC4(rs36138811)	1	CEU
rs11049140	12:27776568-27776568	C	downstream_gene_variant	MODIFIER	-	-	0.746	-0.122332	MANSC4(rs36138811)	1	CEU
rs11049140	12:27776568-27776568	T	downstream_gene_variant	MODIFIER	-	-	0.703	-0.13449	MANSC4(rs36138811)	1	CEU
rs11049141	12:27776690-27776690	A	upstream_gene_variant	MODIFIER	-	-	2.496	0.142312	MANSC4(rs36138811)	1	CEU
rs11049141	12:27776690-27776690	C	upstream_gene_variant	MODIFIER	-	-	2.142	0.105617	MANSC4(rs36138811)	1	CEU
rs11049141	12:27776690-27776690	T	upstream_gene_variant	MODIFIER	-	-	2.033	0.093459	MANSC4(rs36138811)	1	CEU
rs11049141	12:27776690-27776690	A	intron_variant	MODIFIER	-	-	2.496	0.142312	MANSC4(rs36138811)	1	CEU
rs11049141	12:27776690-27776690	C	intron_variant	MODIFIER	-	-	2.142	0.105617	MANSC4(rs36138811)	1	CEU
rs11049141	12:27776690-27776690	T	intron_variant	MODIFIER	-	-	2.033	0.093459	MANSC4(rs36138811)	1	CEU
rs11049141	12:27776690-27776690	A	downstream_gene_variant	MODIFIER	-	-	2.496	0.142312	MANSC4(rs36138811)	1	CEU
rs11049141	12:27776690-27776690	C	downstream_gene_variant	MODIFIER	-	-	2.142	0.105617	MANSC4(rs36138811)	1	CEU
rs11049141	12:27776690-27776690	T	downstream_gene_variant	MODIFIER	-	-	2.033	0.093459	MANSC4(rs36138811)	1	CEU
rs11049142	12:27776841-27776841	G	upstream_gene_variant	MODIFIER	-	-	2.248	0.11711	MANSC4(rs36138811)	1	CEU
rs11049142	12:27776841-27776841	G	intron_variant	MODIFIER	-	-	2.248	0.11711	MANSC4(rs36138811)	1	CEU
rs11049142	12:27776841-27776841	G	downstream_gene_variant	MODIFIER	-	-	2.248	0.11711	MANSC4(rs36138811)	1	CEU
rs11049143	12:27778577-27778577	A	upstream_gene_variant	MODIFIER	-	-	2.143	0.10577	MANSC4(rs36138811)	1	CEU
rs11049143	12:27778577-27778577	A	intron_variant	MODIFIER	-	-	2.143	0.10577	MANSC4(rs36138811)	1	CEU
rs11049143	12:27778577-27778577	A	downstream_gene_variant	MODIFIER	-	-	2.143	0.10577	MANSC4(rs36138811)	1	CEU
rs11049144	12:27778578-27778578	A	upstream_gene_variant	MODIFIER	-	-	1.78	0.062976	MANSC4(rs36138811)	1	CEU
rs11049144	12:27778578-27778578	A	intron_variant	MODIFIER	-	-	1.78	0.062976	MANSC4(rs36138811)	1	CEU
rs11049144	12:27778578-27778578	A	downstream_gene_variant	MODIFIER	-	-	1.78	0.062976	MANSC4(rs36138811)	1	CEU
rs36051142	12:27782766-27782768	AAAAAAAAAAA	intron_variant	MODIFIER	-	-	0.915	-0.079464	MANSC4(rs36138811)	0.741	CEU
rs36051142	12:27782766-27782768	AAAAAAAAAAAA	intron_variant	MODIFIER	-	-	0.06	-0.638443	MANSC4(rs36138811)	0.741	CEU
rs36051142	12:27782766-27782768	AAAAAAAAAAAAAA	intron_variant	MODIFIER	-	-	0.489	-0.208898	MANSC4(rs36138811)	0.741	CEU
rs36051142	12:27782766-27782768	AAAAAAAAAAA	upstream_gene_variant	MODIFIER	-	-	0.915	-0.079464	MANSC4(rs36138811)	0.741	CEU
rs36051142	12:27782766-27782768	AAAAAAAAAAAA	upstream_gene_variant	MODIFIER	-	-	0.06	-0.638443	MANSC4(rs36138811)	0.741	CEU
rs36051142	12:27782766-27782768	AAAAAAAAAAAAAA	upstream_gene_variant	MODIFIER	-	-	0.489	-0.208898	MANSC4(rs36138811)	0.741	CEU
rs36051142	12:27782766-27782768	AAAAAAAAAAA	intron_variant,NMD_transcript_variant	MODIFIER	-	-	0.915	-0.079464	MANSC4(rs36138811)	0.741	CEU
rs36051142	12:27782766-27782768	AAAAAAAAAAAA	intron_variant,NMD_transcript_variant	MODIFIER	-	-	0.06	-0.638443	MANSC4(rs36138811)	0.741	CEU
rs36051142	12:27782766-27782768	AAAAAAAAAAAAAA	intron_variant,NMD_transcript_variant	MODIFIER	-	-	0.489	-0.208898	MANSC4(rs36138811)	0.741	CEU
rs36051142	12:27782766-27782768	AAAAAAAAAAA	intron_variant,non_coding_transcript_variant	MODIFIER	-	-	0.915	-0.079464	MANSC4(rs36138811)	0.741	CEU
rs36051142	12:27782766-27782768	AAAAAAAAAAAA	intron_variant,non_coding_transcript_variant	MODIFIER	-	-	0.06	-0.638443	MANSC4(rs36138811)	0.741	CEU
rs36051142	12:27782766-27782768	AAAAAAAAAAAAAA	intron_variant,non_coding_transcript_variant	MODIFIER	-	-	0.489	-0.208898	MANSC4(rs36138811)	0.741	CEU
rs36051142	12:27782766-27782768	AAAAAAAAAAA	regulatory_region_variant	MODIFIER	-	-	0.915	-0.079464	MANSC4(rs36138811)	0.741	CEU
rs36051142	12:27782766-27782768	AAAAAAAAAAAA	regulatory_region_variant	MODIFIER	-	-	0.06	-0.638443	MANSC4(rs36138811)	0.741	CEU
rs36051142	12:27782766-27782768	AAAAAAAAAAAAAA	regulatory_region_variant	MODIFIER	-	-	0.489	-0.208898	MANSC4(rs36138811)	0.741	CEU
rs61915422	12:27779629-27779629	G	upstream_gene_variant	MODIFIER	-	-	4.13	0.28634	MANSC4(rs36138811)	0.596	CEU
rs61915422	12:27779629-27779629	G	intron_variant	MODIFIER	-	-	4.13	0.28634	MANSC4(rs36138811)	0.596	CEU
rs61915422	12:27779629-27779629	G	downstream_gene_variant	MODIFIER	-	-	4.13	0.28634	MANSC4(rs36138811)	0.596	CEU
rs61915422	12:27779629-27779629	G	regulatory_region_variant	MODIFIER	-	-	4.13	0.28634	MANSC4(rs36138811)	0.596	CEU
rs61915423	12:27784538-27784538	A	intron_variant	MODIFIER	-	-	3.365	0.220926	MANSC4(rs36138811)	0.972	CEU
rs61915423	12:27784538-27784538	G	intron_variant	MODIFIER	-	-	3.566	0.238178	MANSC4(rs36138811)	0.972	CEU
rs61915423	12:27784538-27784538	A	upstream_gene_variant	MODIFIER	-	-	3.365	0.220926	MANSC4(rs36138811)	0.972	CEU
rs61915423	12:27784538-27784538	G	upstream_gene_variant	MODIFIER	-	-	3.566	0.238178	MANSC4(rs36138811)	0.972	CEU
rs61915423	12:27784538-27784538	A	intron_variant,NMD_transcript_variant	MODIFIER	-	-	3.365	0.220926	MANSC4(rs36138811)	0.972	CEU
rs61915423	12:27784538-27784538	G	intron_variant,NMD_transcript_variant	MODIFIER	-	-	3.566	0.238178	MANSC4(rs36138811)	0.972	CEU
rs61915423	12:27784538-27784538	A	intron_variant,non_coding_transcript_variant	MODIFIER	-	-	3.365	0.220926	MANSC4(rs36138811)	0.972	CEU
rs61915423	12:27784538-27784538	G	intron_variant,non_coding_transcript_variant	MODIFIER	-	-	3.566	0.238178	MANSC4(rs36138811)	0.972	CEU
rs61915423	12:27784538-27784538	A	regulatory_region_variant	MODIFIER	-	-	3.365	0.220926	MANSC4(rs36138811)	0.972	CEU
rs61915423	12:27784538-27784538	G	regulatory_region_variant	MODIFIER	-	-	3.566	0.238178	MANSC4(rs36138811)	0.972	CEU
rs71438710	12:27775770-27775772	TTTTTTTTTT	upstream_gene_variant	MODIFIER	-	-	0.819	-0.102528	MANSC4(rs36138811)	0.921	CEU
rs71438710	12:27775770-27775772	TTTTTTTTTTT	upstream_gene_variant	MODIFIER	-	-	0.859	-0.092748	MANSC4(rs36138811)	0.921	CEU
rs71438710	12:27775770-27775772	TTTTTTTTTTTTT	upstream_gene_variant	MODIFIER	-	-	1.169	-0.02804	MANSC4(rs36138811)	0.921	CEU
rs71438710	12:27775770-27775772	TTTTTTTTTTTTTT	upstream_gene_variant	MODIFIER	-	-	1.146	-0.032307	MANSC4(rs36138811)	0.921	CEU
rs71438710	12:27775770-27775772	TTTTTTTTTT	intron_variant	MODIFIER	-	-	0.819	-0.102528	MANSC4(rs36138811)	0.921	CEU
rs71438710	12:27775770-27775772	TTTTTTTTTTT	intron_variant	MODIFIER	-	-	0.859	-0.092748	MANSC4(rs36138811)	0.921	CEU
rs71438710	12:27775770-27775772	TTTTTTTTTTTTT	intron_variant	MODIFIER	-	-	1.169	-0.02804	MANSC4(rs36138811)	0.921	CEU
rs71438710	12:27775770-27775772	TTTTTTTTTTTTTT	intron_variant	MODIFIER	-	-	1.146	-0.032307	MANSC4(rs36138811)	0.921	CEU
rs71438710	12:27775770-27775772	TTTTTTTTTT	downstream_gene_variant	MODIFIER	-	-	0.819	-0.102528	MANSC4(rs36138811)	0.921	CEU
rs71438710	12:27775770-27775772	TTTTTTTTTTT	downstream_gene_variant	MODIFIER	-	-	0.859	-0.092748	MANSC4(rs36138811)	0.921	CEU
rs71438710	12:27775770-27775772	TTTTTTTTTTTTT	downstream_gene_variant	MODIFIER	-	-	1.169	-0.02804	MANSC4(rs36138811)	0.921	CEU
rs71438710	12:27775770-27775772	TTTTTTTTTTTTTT	downstream_gene_variant	MODIFIER	-	-	1.146	-0.032307	MANSC4(rs36138811)	0.921	CEU
rs10586811	17:50550500-50550502	CTCT	intron_variant	MODIFIER	-	-	0.538	-0.189707	SPATA20(rs9890200)	0.599	CEU
rs10586811	17:50550500-50550502	CTCT	downstream_gene_variant	MODIFIER	-	-	0.538	-0.189707	SPATA20(rs9890200)	0.599	CEU
rs10586811	17:50550500-50550502	CTCT	intron_variant,non_coding_transcript_variant	MODIFIER	-	-	0.538	-0.189707	SPATA20(rs9890200)	0.599	CEU
rs10586811	17:50550500-50550502	CTCT	intron_variant,NMD_transcript_variant	MODIFIER	-	-	0.538	-0.189707	SPATA20(rs9890200)	0.599	CEU
rs10586811	17:50550500-50550502	CTCT	upstream_gene_variant	MODIFIER	-	-	0.538	-0.189707	SPATA20(rs9890200)	0.599	CEU
rs10586811	17:50550500-50550502	CTCT	non_coding_transcript_exon_variant	MODIFIER	-	-	0.538	-0.189707	SPATA20(rs9890200)	0.599	CEU
rs10586811	17:50550500-50550502	CTCT	regulatory_region_variant	MODIFIER	-	-	0.538	-0.189707	SPATA20(rs9890200)	0.599	CEU
rs1132414	17:50550731-50550731	G	synonymous_variant	LOW	-	-	5.467	0.403645	SPATA20(rs9890200)	0.574	CEU
rs1132414	17:50550731-50550731	G	downstream_gene_variant	MODIFIER	-	-	5.467	0.403645	SPATA20(rs9890200)	0.574	CEU
rs1132414	17:50550731-50550731	G	non_coding_transcript_exon_variant	MODIFIER	-	-	5.467	0.403645	SPATA20(rs9890200)	0.574	CEU
rs1132414	17:50550731-50550731	G	3_prime_UTR_variant,NMD_transcript_variant	MODIFIER	-	-	5.467	0.403645	SPATA20(rs9890200)	0.574	CEU
rs1132414	17:50550731-50550731	G	upstream_gene_variant	MODIFIER	-	-	5.467	0.403645	SPATA20(rs9890200)	0.574	CEU
rs1132414	17:50550731-50550731	G	synonymous_variant,NMD_transcript_variant	LOW	-	-	5.467	0.403645	SPATA20(rs9890200)	0.574	CEU
rs1132414	17:50550731-50550731	G	regulatory_region_variant	MODIFIER	-	-	5.467	0.403645	SPATA20(rs9890200)	0.574	CEU
rs12943759	17:50548182-50548182	A	intron_variant	MODIFIER	-	-	6.633	0.512327	SPATA20(rs9890200)	0.341	CEU
rs12943759	17:50548182-50548182	C	intron_variant	MODIFIER	-	-	6.24	0.474929	SPATA20(rs9890200)	0.341	CEU
rs12943759	17:50548182-50548182	A	downstream_gene_variant	MODIFIER	-	-	6.633	0.512327	SPATA20(rs9890200)	0.341	CEU
rs12943759	17:50548182-50548182	C	downstream_gene_variant	MODIFIER	-	-	6.24	0.474929	SPATA20(rs9890200)	0.341	CEU
rs12943759	17:50548182-50548182	A	intron_variant,NMD_transcript_variant	MODIFIER	-	-	6.633	0.512327	SPATA20(rs9890200)	0.341	CEU
rs12943759	17:50548182-50548182	C	intron_variant,NMD_transcript_variant	MODIFIER	-	-	6.24	0.474929	SPATA20(rs9890200)	0.341	CEU
rs12943759	17:50548182-50548182	A	intron_variant,non_coding_transcript_variant	MODIFIER	-	-	6.633	0.512327	SPATA20(rs9890200)	0.341	CEU
rs12943759	17:50548182-50548182	C	intron_variant,non_coding_transcript_variant	MODIFIER	-	-	6.24	0.474929	SPATA20(rs9890200)	0.341	CEU
rs12943759	17:50548182-50548182	A	upstream_gene_variant	MODIFIER	-	-	6.633	0.512327	SPATA20(rs9890200)	0.341	CEU
rs12943759	17:50548182-50548182	C	upstream_gene_variant	MODIFIER	-	-	6.24	0.474929	SPATA20(rs9890200)	0.341	CEU
rs12943759	17:50548182-50548182	A	regulatory_region_variant	MODIFIER	-	-	6.633	0.512327	SPATA20(rs9890200)	0.341	CEU
rs12943759	17:50548182-50548182	C	regulatory_region_variant	MODIFIER	-	-	6.24	0.474929	SPATA20(rs9890200)	0.341	CEU
rs1809284	17:50554949-50554949	G	intron_variant	MODIFIER	-	-	0.923	-0.077548	SPATA20(rs9890200)	0.549	CEU
rs1809284	17:50554949-50554949	T	intron_variant	MODIFIER	-	-	0.751	-0.120701	SPATA20(rs9890200)	0.549	CEU
rs1809284	17:50554949-50554949	G	intron_variant,non_coding_transcript_variant	MODIFIER	-	-	0.923	-0.077548	SPATA20(rs9890200)	0.549	CEU
rs1809284	17:50554949-50554949	T	intron_variant,non_coding_transcript_variant	MODIFIER	-	-	0.751	-0.120701	SPATA20(rs9890200)	0.549	CEU
rs1809284	17:50554949-50554949	G	intron_variant,NMD_transcript_variant	MODIFIER	-	-	0.923	-0.077548	SPATA20(rs9890200)	0.549	CEU
rs1809284	17:50554949-50554949	T	intron_variant,NMD_transcript_variant	MODIFIER	-	-	0.751	-0.120701	SPATA20(rs9890200)	0.549	CEU
rs1809284	17:50554949-50554949	G	downstream_gene_variant	MODIFIER	-	-	0.923	-0.077548	SPATA20(rs9890200)	0.549	CEU
rs1809284	17:50554949-50554949	T	downstream_gene_variant	MODIFIER	-	-	0.751	-0.120701	SPATA20(rs9890200)	0.549	CEU
rs2240217	17:50552441-50552441	T	intron_variant	MODIFIER	-	-	0.688	-0.139	SPATA20(rs9890200)	0.549	CEU
rs2240217	17:50552441-50552441	T	downstream_gene_variant	MODIFIER	-	-	0.688	-0.139	SPATA20(rs9890200)	0.549	CEU
rs2240217	17:50552441-50552441	T	intron_variant,non_coding_transcript_variant	MODIFIER	-	-	0.688	-0.139	SPATA20(rs9890200)	0.549	CEU
rs2240217	17:50552441-50552441	T	intron_variant,NMD_transcript_variant	MODIFIER	-	-	0.688	-0.139	SPATA20(rs9890200)	0.549	CEU
rs2240218	17:50553219-50553219	T	intron_variant	MODIFIER	-	-	4.413	0.310714	SPATA20(rs9890200)	0.549	CEU
rs2240218	17:50553219-50553219	T	downstream_gene_variant	MODIFIER	-	-	4.413	0.310714	SPATA20(rs9890200)	0.549	CEU
rs2240218	17:50553219-50553219	T	intron_variant,non_coding_transcript_variant	MODIFIER	-	-	4.413	0.310714	SPATA20(rs9890200)	0.549	CEU
rs2240218	17:50553219-50553219	T	intron_variant,NMD_transcript_variant	MODIFIER	-	-	4.413	0.310714	SPATA20(rs9890200)	0.549	CEU
rs3986428	17:50552481-50552481	CTTTCTTTCTTT	intron_variant	MODIFIER	-	-	0.285	-0.318118	SPATA20(rs9890200)	0.549	CEU
rs3986428	17:50552481-50552481	CTTTCTTTCTTT	downstream_gene_variant	MODIFIER	-	-	0.285	-0.318118	SPATA20(rs9890200)	0.549	CEU
rs3986428	17:50552481-50552481	CTTTCTTTCTTT	intron_variant,non_coding_transcript_variant	MODIFIER	-	-	0.285	-0.318118	SPATA20(rs9890200)	0.549	CEU
rs3986428	17:50552481-50552481	CTTTCTTTCTTT	intron_variant,NMD_transcript_variant	MODIFIER	-	-	0.285	-0.318118	SPATA20(rs9890200)	0.549	CEU
rs553958151	17:50553560-50553562	TTTTTTTTTTTTTT	intron_variant	MODIFIER	-	-	1.016	-0.057556	SPATA20(rs9890200)	0.723	CEU
rs553958151	17:50553560-50553562	TTTTTTTTTTTTTTT	intron_variant	MODIFIER	-	-	0.311	-0.300428	SPATA20(rs9890200)	0.723	CEU
rs553958151	17:50553560-50553562	TTTTTTTTTTTTTTTTT	intron_variant	MODIFIER	-	-	1.161	-0.02963	SPATA20(rs9890200)	0.723	CEU
rs553958151	17:50553560-50553562	TTTTTTTTTTTTTTTTTT	intron_variant	MODIFIER	-	-	1.137	-0.033897	SPATA20(rs9890200)	0.723	CEU
rs553958151	17:50553560-50553562	TTTTTTTTTTTTTTTTTTT	intron_variant	MODIFIER	-	-	1.114	-0.038164	SPATA20(rs9890200)	0.723	CEU
rs553958151	17:50553560-50553562	TTTTTTTTTTTTTTTTTTTTTTTTT	intron_variant	MODIFIER	-	-	-	-	SPATA20(rs9890200)	0.723	CEU
rs553958151	17:50553560-50553562	TTTTTTTTTTTTTT	downstream_gene_variant	MODIFIER	-	-	1.016	-0.057556	SPATA20(rs9890200)	0.723	CEU
rs553958151	17:50553560-50553562	TTTTTTTTTTTTTTT	downstream_gene_variant	MODIFIER	-	-	0.311	-0.300428	SPATA20(rs9890200)	0.723	CEU
rs553958151	17:50553560-50553562	TTTTTTTTTTTTTTTTT	downstream_gene_variant	MODIFIER	-	-	1.161	-0.02963	SPATA20(rs9890200)	0.723	CEU
rs553958151	17:50553560-50553562	TTTTTTTTTTTTTTTTTT	downstream_gene_variant	MODIFIER	-	-	1.137	-0.033897	SPATA20(rs9890200)	0.723	CEU
rs553958151	17:50553560-50553562	TTTTTTTTTTTTTTTTTTT	downstream_gene_variant	MODIFIER	-	-	1.114	-0.038164	SPATA20(rs9890200)	0.723	CEU
rs553958151	17:50553560-50553562	TTTTTTTTTTTTTTTTTTTTTTTTT	downstream_gene_variant	MODIFIER	-	-	-	-	SPATA20(rs9890200)	0.723	CEU
rs553958151	17:50553560-50553562	TTTTTTTTTTTTTT	intron_variant,non_coding_transcript_variant	MODIFIER	-	-	1.016	-0.057556	SPATA20(rs9890200)	0.723	CEU
rs553958151	17:50553560-50553562	TTTTTTTTTTTTTTT	intron_variant,non_coding_transcript_variant	MODIFIER	-	-	0.311	-0.300428	SPATA20(rs9890200)	0.723	CEU
rs553958151	17:50553560-50553562	TTTTTTTTTTTTTTTTT	intron_variant,non_coding_transcript_variant	MODIFIER	-	-	1.161	-0.02963	SPATA20(rs9890200)	0.723	CEU
rs553958151	17:50553560-50553562	TTTTTTTTTTTTTTTTTT	intron_variant,non_coding_transcript_variant	MODIFIER	-	-	1.137	-0.033897	SPATA20(rs9890200)	0.723	CEU
rs553958151	17:50553560-50553562	TTTTTTTTTTTTTTTTTTT	intron_variant,non_coding_transcript_variant	MODIFIER	-	-	1.114	-0.038164	SPATA20(rs9890200)	0.723	CEU
rs553958151	17:50553560-50553562	TTTTTTTTTTTTTTTTTTTTTTTTT	intron_variant,non_coding_transcript_variant	MODIFIER	-	-	-	-	SPATA20(rs9890200)	0.723	CEU
rs553958151	17:50553560-50553562	TTTTTTTTTTTTTT	intron_variant,NMD_transcript_variant	MODIFIER	-	-	1.016	-0.057556	SPATA20(rs9890200)	0.723	CEU
rs553958151	17:50553560-50553562	TTTTTTTTTTTTTTT	intron_variant,NMD_transcript_variant	MODIFIER	-	-	0.311	-0.300428	SPATA20(rs9890200)	0.723	CEU
rs553958151	17:50553560-50553562	TTTTTTTTTTTTTTTTT	intron_variant,NMD_transcript_variant	MODIFIER	-	-	1.161	-0.02963	SPATA20(rs9890200)	0.723	CEU
rs553958151	17:50553560-50553562	TTTTTTTTTTTTTTTTTT	intron_variant,NMD_transcript_variant	MODIFIER	-	-	1.137	-0.033897	SPATA20(rs9890200)	0.723	CEU
rs553958151	17:50553560-50553562	TTTTTTTTTTTTTTTTTTT	intron_variant,NMD_transcript_variant	MODIFIER	-	-	1.114	-0.038164	SPATA20(rs9890200)	0.723	CEU
rs553958151	17:50553560-50553562	TTTTTTTTTTTTTTTTTTTTTTTTT	intron_variant,NMD_transcript_variant	MODIFIER	-	-	-	-	SPATA20(rs9890200)	0.723	CEU
rs6504674	17:50553453-50553453	A	intron_variant	MODIFIER	-	-	4.709	0.336413	SPATA20(rs9890200)	0.549	CEU
rs6504674	17:50553453-50553453	C	intron_variant	MODIFIER	-	-	5.258	0.384827	SPATA20(rs9890200)	0.549	CEU
rs6504674	17:50553453-50553453	A	downstream_gene_variant	MODIFIER	-	-	4.709	0.336413	SPATA20(rs9890200)	0.549	CEU
rs6504674	17:50553453-50553453	C	downstream_gene_variant	MODIFIER	-	-	5.258	0.384827	SPATA20(rs9890200)	0.549	CEU
rs6504674	17:50553453-50553453	A	intron_variant,non_coding_transcript_variant	MODIFIER	-	-	4.709	0.336413	SPATA20(rs9890200)	0.549	CEU
rs6504674	17:50553453-50553453	C	intron_variant,non_coding_transcript_variant	MODIFIER	-	-	5.258	0.384827	SPATA20(rs9890200)	0.549	CEU
rs6504674	17:50553453-50553453	A	intron_variant,NMD_transcript_variant	MODIFIER	-	-	4.709	0.336413	SPATA20(rs9890200)	0.549	CEU
rs6504674	17:50553453-50553453	C	intron_variant,NMD_transcript_variant	MODIFIER	-	-	5.258	0.384827	SPATA20(rs9890200)	0.549	CEU
rs6504675	17:50556996-50556996	C	downstream_gene_variant	MODIFIER	-	-	15.87	1.52049	SPATA20(rs9890200)	0.958	CEU
rs6504675	17:50556996-50556996	C	upstream_gene_variant	MODIFIER	-	-	15.87	1.52049	SPATA20(rs9890200)	0.958	CEU
rs6504675	17:50556996-50556996	C	non_coding_transcript_exon_variant	MODIFIER	-	-	15.87	1.52049	SPATA20(rs9890200)	0.958	CEU
rs6504675	17:50556996-50556996	C	regulatory_region_variant	MODIFIER	-	-	15.87	1.52049	SPATA20(rs9890200)	0.958	CEU
rs7214956	17:50549787-50549787	C	intron_variant	MODIFIER	-	-	0.444	-0.228401	SPATA20(rs9890200)	0.599	CEU
rs7214956	17:50549787-50549787	C	downstream_gene_variant	MODIFIER	-	-	0.444	-0.228401	SPATA20(rs9890200)	0.599	CEU
rs7214956	17:50549787-50549787	C	intron_variant,non_coding_transcript_variant	MODIFIER	-	-	0.444	-0.228401	SPATA20(rs9890200)	0.599	CEU
rs7214956	17:50549787-50549787	C	intron_variant,NMD_transcript_variant	MODIFIER	-	-	0.444	-0.228401	SPATA20(rs9890200)	0.599	CEU
rs7214956	17:50549787-50549787	C	upstream_gene_variant	MODIFIER	-	-	0.444	-0.228401	SPATA20(rs9890200)	0.599	CEU
rs7214956	17:50549787-50549787	C	regulatory_region_variant	MODIFIER	-	-	0.444	-0.228401	SPATA20(rs9890200)	0.599	CEU
rs73338243	17:50553963-50553963	C	intron_variant	MODIFIER	-	-	7.309	0.579173	SPATA20(rs9890200)	0.549	CEU
rs73338243	17:50553963-50553963	C	downstream_gene_variant	MODIFIER	-	-	7.309	0.579173	SPATA20(rs9890200)	0.549	CEU
rs73338243	17:50553963-50553963	C	intron_variant,non_coding_transcript_variant	MODIFIER	-	-	7.309	0.579173	SPATA20(rs9890200)	0.549	CEU
rs73338243	17:50553963-50553963	C	intron_variant,NMD_transcript_variant	MODIFIER	-	-	7.309	0.579173	SPATA20(rs9890200)	0.549	CEU
rs739924	17:50554246-50554246	C	splice_region_variant,intron_variant	LOW	-	-	5.874	0.440745	SPATA20(rs9890200)	0.549	CEU
rs739924	17:50554246-50554246	C	downstream_gene_variant	MODIFIER	-	-	5.874	0.440745	SPATA20(rs9890200)	0.549	CEU
rs739924	17:50554246-50554246	C	splice_region_variant,intron_variant,non_coding_transcript_variant	LOW	-	-	5.874	0.440745	SPATA20(rs9890200)	0.549	CEU
rs739924	17:50554246-50554246	C	splice_region_variant,intron_variant,NMD_transcript_variant	LOW	-	-	5.874	0.440745	SPATA20(rs9890200)	0.549	CEU
rs8066368	17:50552389-50552389	C	intron_variant	MODIFIER	-	-	2.248	0.117094	SPATA20(rs9890200)	0.549	CEU
rs8066368	17:50552389-50552389	C	downstream_gene_variant	MODIFIER	-	-	2.248	0.117094	SPATA20(rs9890200)	0.549	CEU
rs8066368	17:50552389-50552389	C	intron_variant,non_coding_transcript_variant	MODIFIER	-	-	2.248	0.117094	SPATA20(rs9890200)	0.549	CEU
rs8066368	17:50552389-50552389	C	intron_variant,NMD_transcript_variant	MODIFIER	-	-	2.248	0.117094	SPATA20(rs9890200)	0.549	CEU
rs8076470	17:50548467-50548467	G	intron_variant	MODIFIER	-	-	5.458	0.402839	SPATA20(rs9890200)	0.958	CEU
rs8076470	17:50548467-50548467	T	intron_variant	MODIFIER	-	-	5.921	0.445112	SPATA20(rs9890200)	0.958	CEU
rs8076470	17:50548467-50548467	G	downstream_gene_variant	MODIFIER	-	-	5.458	0.402839	SPATA20(rs9890200)	0.958	CEU
rs8076470	17:50548467-50548467	T	downstream_gene_variant	MODIFIER	-	-	5.921	0.445112	SPATA20(rs9890200)	0.958	CEU
rs8076470	17:50548467-50548467	G	intron_variant,NMD_transcript_variant	MODIFIER	-	-	5.458	0.402839	SPATA20(rs9890200)	0.958	CEU
rs8076470	17:50548467-50548467	T	intron_variant,NMD_transcript_variant	MODIFIER	-	-	5.921	0.445112	SPATA20(rs9890200)	0.958	CEU
rs8076470	17:50548467-50548467	G	intron_variant,non_coding_transcript_variant	MODIFIER	-	-	5.458	0.402839	SPATA20(rs9890200)	0.958	CEU
rs8076470	17:50548467-50548467	T	intron_variant,non_coding_transcript_variant	MODIFIER	-	-	5.921	0.445112	SPATA20(rs9890200)	0.958	CEU
rs8076470	17:50548467-50548467	G	upstream_gene_variant	MODIFIER	-	-	5.458	0.402839	SPATA20(rs9890200)	0.958	CEU
rs8076470	17:50548467-50548467	T	upstream_gene_variant	MODIFIER	-	-	5.921	0.445112	SPATA20(rs9890200)	0.958	CEU
rs8076470	17:50548467-50548467	G	non_coding_transcript_exon_variant	MODIFIER	-	-	5.458	0.402839	SPATA20(rs9890200)	0.958	CEU
rs8076470	17:50548467-50548467	T	non_coding_transcript_exon_variant	MODIFIER	-	-	5.921	0.445112	SPATA20(rs9890200)	0.958	CEU
rs8076628	17:50549265-50549265	A	intron_variant	MODIFIER	-	-	1.764	0.060935	SPATA20(rs9890200)	0.599	CEU
rs8076628	17:50549265-50549265	A	intron_variant,NMD_transcript_variant	MODIFIER	-	-	1.764	0.060935	SPATA20(rs9890200)	0.599	CEU
rs8076628	17:50549265-50549265	A	intron_variant,non_coding_transcript_variant	MODIFIER	-	-	1.764	0.060935	SPATA20(rs9890200)	0.599	CEU
rs8076628	17:50549265-50549265	A	upstream_gene_variant	MODIFIER	-	-	1.764	0.060935	SPATA20(rs9890200)	0.599	CEU
rs8076628	17:50549265-50549265	A	downstream_gene_variant	MODIFIER	-	-	1.764	0.060935	SPATA20(rs9890200)	0.599	CEU
rs8076628	17:50549265-50549265	A	regulatory_region_variant	MODIFIER	-	-	1.764	0.060935	SPATA20(rs9890200)	0.599	CEU
rs8076632	17:50548567-50548567	G	missense_variant	MODERATE	tolerated(0.47)	benign(0.007)	18.89	1.95147	SPATA20(rs9890200)	1	CEU
rs8076632	17:50548567-50548567	G	downstream_gene_variant	MODIFIER	-	-	18.89	1.95147	SPATA20(rs9890200)	1	CEU
rs8076632	17:50548567-50548567	G	missense_variant	MODERATE	tolerated(0.45)	benign(0.007)	18.89	1.95147	SPATA20(rs9890200)	1	CEU
rs8076632	17:50548567-50548567	G	3_prime_UTR_variant,NMD_transcript_variant	MODIFIER	-	-	18.89	1.95147	SPATA20(rs9890200)	1	CEU
rs8076632	17:50548567-50548567	G	non_coding_transcript_exon_variant	MODIFIER	-	-	18.89	1.95147	SPATA20(rs9890200)	1	CEU
rs8076632	17:50548567-50548567	G	upstream_gene_variant	MODIFIER	-	-	18.89	1.95147	SPATA20(rs9890200)	1	CEU
rs8076632	17:50548567-50548567	G	intron_variant,NMD_transcript_variant	MODIFIER	-	-	18.89	1.95147	SPATA20(rs9890200)	1	CEU
rs8076632	17:50548567-50548567	G	missense_variant,NMD_transcript_variant	MODERATE	tolerated(1)	benign(0.007)	18.89	1.95147	SPATA20(rs9890200)	1	CEU
rs8076632	17:50548567-50548567	G	missense_variant	MODERATE	tolerated(0.46)	benign(0.087)	18.89	1.95147	SPATA20(rs9890200)	1	CEU
rs8077316	17:50549028-50549028	T	intron_variant	MODIFIER	-	-	2.007	0.090503	SPATA20(rs9890200)	0.599	CEU
rs8077316	17:50549028-50549028	T	intron_variant,NMD_transcript_variant	MODIFIER	-	-	2.007	0.090503	SPATA20(rs9890200)	0.599	CEU
rs8077316	17:50549028-50549028	T	intron_variant,non_coding_transcript_variant	MODIFIER	-	-	2.007	0.090503	SPATA20(rs9890200)	0.599	CEU
rs8077316	17:50549028-50549028	T	upstream_gene_variant	MODIFIER	-	-	2.007	0.090503	SPATA20(rs9890200)	0.599	CEU
rs8077316	17:50549028-50549028	T	downstream_gene_variant	MODIFIER	-	-	2.007	0.090503	SPATA20(rs9890200)	0.599	CEU
rs8077316	17:50549028-50549028	T	non_coding_transcript_exon_variant	MODIFIER	-	-	2.007	0.090503	SPATA20(rs9890200)	0.599	CEU
rs8077323	17:50549037-50549037	T	splice_region_variant,intron_variant	LOW	-	-	0.04	-0.71497	SPATA20(rs9890200)	0.599	CEU
rs8077323	17:50549037-50549037	T	splice_region_variant,intron_variant,NMD_transcript_variant	LOW	-	-	0.04	-0.71497	SPATA20(rs9890200)	0.599	CEU
rs8077323	17:50549037-50549037	T	splice_region_variant,intron_variant,non_coding_transcript_variant	LOW	-	-	0.04	-0.71497	SPATA20(rs9890200)	0.599	CEU
rs8077323	17:50549037-50549037	T	upstream_gene_variant	MODIFIER	-	-	0.04	-0.71497	SPATA20(rs9890200)	0.599	CEU
rs8077323	17:50549037-50549037	T	downstream_gene_variant	MODIFIER	-	-	0.04	-0.71497	SPATA20(rs9890200)	0.599	CEU
rs8077323	17:50549037-50549037	T	non_coding_transcript_exon_variant	MODIFIER	-	-	0.04	-0.71497	SPATA20(rs9890200)	0.599	CEU
rs8077587	17:50549214-50549214	T	intron_variant	MODIFIER	-	-	0.057	-0.64708	SPATA20(rs9890200)	0.599	CEU
rs8077587	17:50549214-50549214	T	intron_variant,NMD_transcript_variant	MODIFIER	-	-	0.057	-0.64708	SPATA20(rs9890200)	0.599	CEU
rs8077587	17:50549214-50549214	T	intron_variant,non_coding_transcript_variant	MODIFIER	-	-	0.057	-0.64708	SPATA20(rs9890200)	0.599	CEU
rs8077587	17:50549214-50549214	T	upstream_gene_variant	MODIFIER	-	-	0.057	-0.64708	SPATA20(rs9890200)	0.599	CEU
rs8077587	17:50549214-50549214	T	downstream_gene_variant	MODIFIER	-	-	0.057	-0.64708	SPATA20(rs9890200)	0.599	CEU
rs8077587	17:50549214-50549214	T	regulatory_region_variant	MODIFIER	-	-	0.057	-0.64708	SPATA20(rs9890200)	0.599	CEU
rs8082568	17:50551951-50551951	A	intron_variant	MODIFIER	-	-	5.739	0.428347	SPATA20(rs9890200)	0.549	CEU
rs8082568	17:50551951-50551951	C	intron_variant	MODIFIER	-	-	5.334	0.391653	SPATA20(rs9890200)	0.549	CEU
rs8082568	17:50551951-50551951	T	intron_variant	MODIFIER	-	-	5.198	0.379494	SPATA20(rs9890200)	0.549	CEU
rs8082568	17:50551951-50551951	A	downstream_gene_variant	MODIFIER	-	-	5.739	0.428347	SPATA20(rs9890200)	0.549	CEU
rs8082568	17:50551951-50551951	C	downstream_gene_variant	MODIFIER	-	-	5.334	0.391653	SPATA20(rs9890200)	0.549	CEU
rs8082568	17:50551951-50551951	T	downstream_gene_variant	MODIFIER	-	-	5.198	0.379494	SPATA20(rs9890200)	0.549	CEU
rs8082568	17:50551951-50551951	A	non_coding_transcript_exon_variant	MODIFIER	-	-	5.739	0.428347	SPATA20(rs9890200)	0.549	CEU
rs8082568	17:50551951-50551951	C	non_coding_transcript_exon_variant	MODIFIER	-	-	5.334	0.391653	SPATA20(rs9890200)	0.549	CEU
rs8082568	17:50551951-50551951	T	non_coding_transcript_exon_variant	MODIFIER	-	-	5.198	0.379494	SPATA20(rs9890200)	0.549	CEU
rs8082568	17:50551951-50551951	A	intron_variant,NMD_transcript_variant	MODIFIER	-	-	5.739	0.428347	SPATA20(rs9890200)	0.549	CEU
rs8082568	17:50551951-50551951	C	intron_variant,NMD_transcript_variant	MODIFIER	-	-	5.334	0.391653	SPATA20(rs9890200)	0.549	CEU
rs8082568	17:50551951-50551951	T	intron_variant,NMD_transcript_variant	MODIFIER	-	-	5.198	0.379494	SPATA20(rs9890200)	0.549	CEU
rs873839	17:50554496-50554496	A	intron_variant	MODIFIER	-	-	2.253	0.117557	SPATA20(rs9890200)	0.599	CEU
rs873839	17:50554496-50554496	T	intron_variant	MODIFIER	-	-	1.825	0.068704	SPATA20(rs9890200)	0.599	CEU
rs873839	17:50554496-50554496	A	intron_variant,non_coding_transcript_variant	MODIFIER	-	-	2.253	0.117557	SPATA20(rs9890200)	0.599	CEU
rs873839	17:50554496-50554496	T	intron_variant,non_coding_transcript_variant	MODIFIER	-	-	1.825	0.068704	SPATA20(rs9890200)	0.599	CEU
rs873839	17:50554496-50554496	A	intron_variant,NMD_transcript_variant	MODIFIER	-	-	2.253	0.117557	SPATA20(rs9890200)	0.599	CEU
rs873839	17:50554496-50554496	T	intron_variant,NMD_transcript_variant	MODIFIER	-	-	1.825	0.068704	SPATA20(rs9890200)	0.599	CEU
rs873839	17:50554496-50554496	A	downstream_gene_variant	MODIFIER	-	-	2.253	0.117557	SPATA20(rs9890200)	0.599	CEU
rs873839	17:50554496-50554496	T	downstream_gene_variant	MODIFIER	-	-	1.825	0.068704	SPATA20(rs9890200)	0.599	CEU
rs878619	17:50555910-50555910	G	downstream_gene_variant	MODIFIER	-	-	1.889	0.076475	SPATA20(rs9890200)	0.958	CEU
rs878619	17:50555910-50555910	G	upstream_gene_variant	MODIFIER	-	-	1.889	0.076475	SPATA20(rs9890200)	0.958	CEU
rs898453	17:50555040-50555040	A	intron_variant	MODIFIER	-	-	0.87	-0.090057	SPATA20(rs9890200)	0.599	CEU
rs898453	17:50555040-50555040	A	intron_variant,non_coding_transcript_variant	MODIFIER	-	-	0.87	-0.090057	SPATA20(rs9890200)	0.599	CEU
rs898453	17:50555040-50555040	A	intron_variant,NMD_transcript_variant	MODIFIER	-	-	0.87	-0.090057	SPATA20(rs9890200)	0.599	CEU
rs898453	17:50555040-50555040	A	downstream_gene_variant	MODIFIER	-	-	0.87	-0.090057	SPATA20(rs9890200)	0.599	CEU
rs916978	17:50553091-50553091	C	intron_variant	MODIFIER	-	-	0.837	-0.098054	SPATA20(rs9890200)	0.549	CEU
rs916978	17:50553091-50553091	C	downstream_gene_variant	MODIFIER	-	-	0.837	-0.098054	SPATA20(rs9890200)	0.549	CEU
rs916978	17:50553091-50553091	C	intron_variant,non_coding_transcript_variant	MODIFIER	-	-	0.837	-0.098054	SPATA20(rs9890200)	0.549	CEU
rs916978	17:50553091-50553091	C	intron_variant,NMD_transcript_variant	MODIFIER	-	-	0.837	-0.098054	SPATA20(rs9890200)	0.549	CEU
rs9913430	17:50551109-50551109	A	missense_variant	MODERATE	tolerated(0.49)	benign(0)	3.495	0.232079	SPATA20(rs9890200)	0.549	CEU
rs9913430	17:50551109-50551109	A	downstream_gene_variant	MODIFIER	-	-	3.495	0.232079	SPATA20(rs9890200)	0.549	CEU
rs9913430	17:50551109-50551109	A	non_coding_transcript_exon_variant	MODIFIER	-	-	3.495	0.232079	SPATA20(rs9890200)	0.549	CEU
rs9913430	17:50551109-50551109	A	3_prime_UTR_variant,NMD_transcript_variant	MODIFIER	-	-	3.495	0.232079	SPATA20(rs9890200)	0.549	CEU
rs9913430	17:50551109-50551109	A	intron_variant,NMD_transcript_variant	MODIFIER	-	-	3.495	0.232079	SPATA20(rs9890200)	0.549	CEU
rs9913430	17:50551109-50551109	A	missense_variant,NMD_transcript_variant	MODERATE	tolerated(0.65)	benign(0)	3.495	0.232079	SPATA20(rs9890200)	0.549	CEU
rs9913430	17:50551109-50551109	A	missense_variant	MODERATE	tolerated(0.46)	benign(0)	3.495	0.232079	SPATA20(rs9890200)	0.549	CEU
rs9913430	17:50551109-50551109	A	regulatory_region_variant	MODIFIER	-	-	3.495	0.232079	SPATA20(rs9890200)	0.549	CEU
rs9913430	17:50551109-50551109	A	TF_binding_site_variant	MODIFIER	-	-	3.495	0.232079	SPATA20(rs9890200)	0.549	CEU
rs9913677	17:50551220-50551220	A	intron_variant	MODIFIER	-	-	1.187	-0.024944	SPATA20(rs9890200)	0.549	CEU
rs9913677	17:50551220-50551220	C	intron_variant	MODIFIER	-	-	1.489	0.02347	SPATA20(rs9890200)	0.549	CEU
rs9913677	17:50551220-50551220	A	downstream_gene_variant	MODIFIER	-	-	1.187	-0.024944	SPATA20(rs9890200)	0.549	CEU
rs9913677	17:50551220-50551220	C	downstream_gene_variant	MODIFIER	-	-	1.489	0.02347	SPATA20(rs9890200)	0.549	CEU
rs9913677	17:50551220-50551220	A	non_coding_transcript_exon_variant	MODIFIER	-	-	1.187	-0.024944	SPATA20(rs9890200)	0.549	CEU
rs9913677	17:50551220-50551220	C	non_coding_transcript_exon_variant	MODIFIER	-	-	1.489	0.02347	SPATA20(rs9890200)	0.549	CEU
rs9913677	17:50551220-50551220	A	intron_variant,NMD_transcript_variant	MODIFIER	-	-	1.187	-0.024944	SPATA20(rs9890200)	0.549	CEU
rs9913677	17:50551220-50551220	C	intron_variant,NMD_transcript_variant	MODIFIER	-	-	1.489	0.02347	SPATA20(rs9890200)	0.549	CEU
rs9913677	17:50551220-50551220	A	intron_variant,non_coding_transcript_variant	MODIFIER	-	-	1.187	-0.024944	SPATA20(rs9890200)	0.549	CEU
rs9913677	17:50551220-50551220	C	intron_variant,non_coding_transcript_variant	MODIFIER	-	-	1.489	0.02347	SPATA20(rs9890200)	0.549	CEU
rs9913677	17:50551220-50551220	A	missense_variant,splice_region_variant,NMD_transcript_variant	MODERATE	deleterious_low_confidence(0)	benign(0.011)	1.187	-0.024944	SPATA20(rs9890200)	0.549	CEU
rs9913677	17:50551220-50551220	C	missense_variant,splice_region_variant,NMD_transcript_variant	MODERATE	deleterious_low_confidence(0)	benign(0.027)	1.489	0.02347	SPATA20(rs9890200)	0.549	CEU
rs9913677	17:50551220-50551220	A	regulatory_region_variant	MODIFIER	-	-	1.187	-0.024944	SPATA20(rs9890200)	0.549	CEU
rs9913677	17:50551220-50551220	C	regulatory_region_variant	MODIFIER	-	-	1.489	0.02347	SPATA20(rs9890200)	0.549	CEU
rs1641511	17:7656359-7656359	A	3_prime_UTR_variant	MODIFIER	-	-	0.424	-0.237369	ATP1B2(rs1642762)	0.356	CEU
rs1641511	17:7656359-7656359	T	3_prime_UTR_variant	MODIFIER	-	-	0.329	-0.28902	ATP1B2(rs1642762)	0.356	CEU
rs1641511	17:7656359-7656359	A	downstream_gene_variant	MODIFIER	-	-	0.424	-0.237369	ATP1B2(rs1642762)	0.356	CEU
rs1641511	17:7656359-7656359	T	downstream_gene_variant	MODIFIER	-	-	0.329	-0.28902	ATP1B2(rs1642762)	0.356	CEU
rs1641512	17:7656144-7656144	A	3_prime_UTR_variant	MODIFIER	-	-	0.717	-0.130355	ATP1B2(rs1642762)	0.356	CEU
rs1641512	17:7656144-7656144	C	3_prime_UTR_variant	MODIFIER	-	-	0.593	-0.169849	ATP1B2(rs1642762)	0.356	CEU
rs1641512	17:7656144-7656144	T	3_prime_UTR_variant	MODIFIER	-	-	0.571	-0.177343	ATP1B2(rs1642762)	0.356	CEU
rs1641512	17:7656144-7656144	A	downstream_gene_variant	MODIFIER	-	-	0.717	-0.130355	ATP1B2(rs1642762)	0.356	CEU
rs1641512	17:7656144-7656144	C	downstream_gene_variant	MODIFIER	-	-	0.593	-0.169849	ATP1B2(rs1642762)	0.356	CEU
rs1641512	17:7656144-7656144	T	downstream_gene_variant	MODIFIER	-	-	0.571	-0.177343	ATP1B2(rs1642762)	0.356	CEU
rs1642763	17:7654101-7654101	G	synonymous_variant	LOW	-	-	9.243	0.784896	ATP1B2(rs1642762)	0.356	CEU
rs1642763	17:7654101-7654101	T	synonymous_variant	LOW	-	-	8.801	0.737841	ATP1B2(rs1642762)	0.356	CEU
rs1642763	17:7654101-7654101	G	upstream_gene_variant	MODIFIER	-	-	9.243	0.784896	ATP1B2(rs1642762)	0.356	CEU
rs1642763	17:7654101-7654101	T	upstream_gene_variant	MODIFIER	-	-	8.801	0.737841	ATP1B2(rs1642762)	0.356	CEU
rs1642763	17:7654101-7654101	G	regulatory_region_variant	MODIFIER	-	-	9.243	0.784896	ATP1B2(rs1642762)	0.356	CEU
rs1642763	17:7654101-7654101	T	regulatory_region_variant	MODIFIER	-	-	8.801	0.737841	ATP1B2(rs1642762)	0.356	CEU
rs1642764	17:7654516-7654516	T	intron_variant	MODIFIER	-	-	0.662	-0.14712	ATP1B2(rs1642762)	0.833	CEU
rs28508151	15:41577225-41577225	A	intron_variant	MODIFIER	-	-	1.988	0.088219	TYRO3(rs2289743)	0.268	CEU
rs28508151	15:41577225-41577225	A	downstream_gene_variant	MODIFIER	-	-	1.988	0.088219	TYRO3(rs2289743)	0.268	CEU
rs28508151	15:41577225-41577225	A	upstream_gene_variant	MODIFIER	-	-	1.988	0.088219	TYRO3(rs2289743)	0.268	CEU
rs28655000	15:41576250-41576250	G	intron_variant	MODIFIER	-	-	1.532	0.029638	TYRO3(rs2289743)	0.297	CEU
rs28655000	15:41576250-41576250	G	downstream_gene_variant	MODIFIER	-	-	1.532	0.029638	TYRO3(rs2289743)	0.297	CEU
rs28655000	15:41576250-41576250	G	upstream_gene_variant	MODIFIER	-	-	1.532	0.029638	TYRO3(rs2289743)	0.297	CEU
rs28657602	15:41576964-41576964	A	intron_variant	MODIFIER	-	-	1.257	-0.01291	TYRO3(rs2289743)	0.977	CEU
rs28657602	15:41576964-41576964	A	downstream_gene_variant	MODIFIER	-	-	1.257	-0.01291	TYRO3(rs2289743)	0.977	CEU
rs28657602	15:41576964-41576964	A	upstream_gene_variant	MODIFIER	-	-	1.257	-0.01291	TYRO3(rs2289743)	0.977	CEU
rs397853986	15:41576105-41576111	AAAAAAAAAAAAAAA	intron_variant	MODIFIER	-	-	0.403	-0.247931	TYRO3(rs2289743)	0.323	CEU
rs397853986	15:41576105-41576111	AAAAAAAAAAAAAAAAA	intron_variant	MODIFIER	-	-	0.389	-0.255117	TYRO3(rs2289743)	0.323	CEU
rs397853986	15:41576105-41576111	AAAAAAAAAAAAAAAAAA	intron_variant	MODIFIER	-	-	0.398	-0.250485	TYRO3(rs2289743)	0.323	CEU
rs397853986	15:41576105-41576111	AAAAAAAAAAAAAAAAAAA	intron_variant	MODIFIER	-	-	0.405	-0.246788	TYRO3(rs2289743)	0.323	CEU
rs397853986	15:41576105-41576111	AAAAAAAAAAAAAAAAAAAA	intron_variant	MODIFIER	-	-	0.413	-0.242747	TYRO3(rs2289743)	0.323	CEU
rs397853986	15:41576105-41576111	AAAAAAAAAAAAAAAAAAAAAA	intron_variant	MODIFIER	-	-	0.538	-0.18947	TYRO3(rs2289743)	0.323	CEU
rs397853986	15:41576105-41576111	AAAAAAAAAAAAAAAAAAAAAAA	intron_variant	MODIFIER	-	-	0.524	-0.194879	TYRO3(rs2289743)	0.323	CEU
rs397853986	15:41576105-41576111	AAAAAAAAAAAAAAAAAAAAAAAA	intron_variant	MODIFIER	-	-	0.513	-0.199146	TYRO3(rs2289743)	0.323	CEU
rs397853986	15:41576105-41576111	AAAAAAAAAAAAAAA	downstream_gene_variant	MODIFIER	-	-	0.403	-0.247931	TYRO3(rs2289743)	0.323	CEU
rs397853986	15:41576105-41576111	AAAAAAAAAAAAAAAAA	downstream_gene_variant	MODIFIER	-	-	0.389	-0.255117	TYRO3(rs2289743)	0.323	CEU
rs397853986	15:41576105-41576111	AAAAAAAAAAAAAAAAAA	downstream_gene_variant	MODIFIER	-	-	0.398	-0.250485	TYRO3(rs2289743)	0.323	CEU
rs397853986	15:41576105-41576111	AAAAAAAAAAAAAAAAAAA	downstream_gene_variant	MODIFIER	-	-	0.405	-0.246788	TYRO3(rs2289743)	0.323	CEU
rs397853986	15:41576105-41576111	AAAAAAAAAAAAAAAAAAAA	downstream_gene_variant	MODIFIER	-	-	0.413	-0.242747	TYRO3(rs2289743)	0.323	CEU
rs397853986	15:41576105-41576111	AAAAAAAAAAAAAAAAAAAAAA	downstream_gene_variant	MODIFIER	-	-	0.538	-0.18947	TYRO3(rs2289743)	0.323	CEU
rs397853986	15:41576105-41576111	AAAAAAAAAAAAAAAAAAAAAAA	downstream_gene_variant	MODIFIER	-	-	0.524	-0.194879	TYRO3(rs2289743)	0.323	CEU
rs397853986	15:41576105-41576111	AAAAAAAAAAAAAAAAAAAAAAAA	downstream_gene_variant	MODIFIER	-	-	0.513	-0.199146	TYRO3(rs2289743)	0.323	CEU
rs397853986	15:41576105-41576111	AAAAAAAAAAAAAAA	upstream_gene_variant	MODIFIER	-	-	0.403	-0.247931	TYRO3(rs2289743)	0.323	CEU
rs397853986	15:41576105-41576111	AAAAAAAAAAAAAAAAA	upstream_gene_variant	MODIFIER	-	-	0.389	-0.255117	TYRO3(rs2289743)	0.323	CEU
rs397853986	15:41576105-41576111	AAAAAAAAAAAAAAAAAA	upstream_gene_variant	MODIFIER	-	-	0.398	-0.250485	TYRO3(rs2289743)	0.323	CEU
rs397853986	15:41576105-41576111	AAAAAAAAAAAAAAAAAAA	upstream_gene_variant	MODIFIER	-	-	0.405	-0.246788	TYRO3(rs2289743)	0.323	CEU
rs397853986	15:41576105-41576111	AAAAAAAAAAAAAAAAAAAA	upstream_gene_variant	MODIFIER	-	-	0.413	-0.242747	TYRO3(rs2289743)	0.323	CEU
rs397853986	15:41576105-41576111	AAAAAAAAAAAAAAAAAAAAAA	upstream_gene_variant	MODIFIER	-	-	0.538	-0.18947	TYRO3(rs2289743)	0.323	CEU
rs397853986	15:41576105-41576111	AAAAAAAAAAAAAAAAAAAAAAA	upstream_gene_variant	MODIFIER	-	-	0.524	-0.194879	TYRO3(rs2289743)	0.323	CEU
rs397853986	15:41576105-41576111	AAAAAAAAAAAAAAAAAAAAAAAA	upstream_gene_variant	MODIFIER	-	-	0.513	-0.199146	TYRO3(rs2289743)	0.323	CEU
rs4924554	15:41574881-41574881	A	intron_variant	MODIFIER	-	-	1.066	-0.04753	TYRO3(rs2289743)	0.297	CEU
rs4924554	15:41574881-41574881	A	downstream_gene_variant	MODIFIER	-	-	1.066	-0.04753	TYRO3(rs2289743)	0.297	CEU
rs4924554	15:41574881-41574881	A	upstream_gene_variant	MODIFIER	-	-	1.066	-0.04753	TYRO3(rs2289743)	0.297	CEU
rs10638549	5:103085510-103085513	TTTT	downstream_gene_variant	MODIFIER	-	-	0.011	-0.947669	PAM(rs257309)	0.888	CEU
rs10638549	5:103085510-103085513	TTTTTTTTT	downstream_gene_variant	MODIFIER	-	-	0.77	-0.115616	PAM(rs257309)	0.888	CEU
rs10638549	5:103085510-103085513	TTTTTTTTTT	downstream_gene_variant	MODIFIER	-	-	0.754	-0.119883	PAM(rs257309)	0.888	CEU
rs10638549	5:103085510-103085513	TTTTTTTTTTT	downstream_gene_variant	MODIFIER	-	-	0.739	-0.12415	PAM(rs257309)	0.888	CEU
rs149549140	5:103083576-103083579	CACCA	downstream_gene_variant	MODIFIER	-	-	1.103	-0.040301	PAM(rs257309)	0.783	CEU
rs185387	5:103084315-103084315	A	downstream_gene_variant	MODIFIER	-	-	1.065	-0.047708	PAM(rs257309)	0.888	CEU
rs185387	5:103084315-103084315	C	downstream_gene_variant	MODIFIER	-	-	1.34	0.000706	PAM(rs257309)	0.888	CEU
rs257310	5:103083149-103083149	T	downstream_gene_variant	MODIFIER	-	-	3.022	0.190999	PAM(rs257309)	0.783	CEU
rs257311	5:103083394-103083394	G	downstream_gene_variant	MODIFIER	-	-	0.796	-0.108726	PAM(rs257309)	0.888	CEU
rs257312	5:103083923-103083923	A	downstream_gene_variant	MODIFIER	-	-	5.775	0.43169	PAM(rs257309)	0.888	CEU
rs257312	5:103083923-103083923	C	downstream_gene_variant	MODIFIER	-	-	6.295	0.480104	PAM(rs257309)	0.888	CEU
rs257312	5:103083923-103083923	G	downstream_gene_variant	MODIFIER	-	-	5.96	0.448699	PAM(rs257309)	0.888	CEU
rs257313	5:103084943-103084943	C	downstream_gene_variant	MODIFIER	-	-	0.109	-0.517349	PAM(rs257309)	0.888	CEU
rs257313	5:103084943-103084943	G	downstream_gene_variant	MODIFIER	-	-	0.126	-0.487682	PAM(rs257309)	0.888	CEU
rs257313	5:103084943-103084943	T	downstream_gene_variant	MODIFIER	-	-	0.102	-0.530835	PAM(rs257309)	0.888	CEU
rs257314	5:103085391-103085391	C	downstream_gene_variant	MODIFIER	-	-	1.741	0.058021	PAM(rs257309)	0.888	CEU
rs257315	5:103085725-103085725	A	downstream_gene_variant	MODIFIER	-	-	3.707	0.250266	PAM(rs257309)	0.888	CEU
rs257315	5:103085725-103085725	G	downstream_gene_variant	MODIFIER	-	-	3.91	0.267518	PAM(rs257309)	0.888	CEU
rs257316	5:103086739-103086739	T	3_prime_UTR_variant	MODIFIER	-	-	0.733	-0.125964	PAM(rs257309)	0.888	CEU
rs257316	5:103086739-103086739	T	downstream_gene_variant	MODIFIER	-	-	0.733	-0.125964	PAM(rs257309)	0.888	CEU
rs257316	5:103086739-103086739	T	3_prime_UTR_variant,NMD_transcript_variant	MODIFIER	-	-	0.733	-0.125964	PAM(rs257309)	0.888	CEU
rs257317	5:103086881-103086881	C	3_prime_UTR_variant	MODIFIER	-	-	1.353	0.002784	PAM(rs257309)	0.91	CEU
rs257317	5:103086881-103086881	C	downstream_gene_variant	MODIFIER	-	-	1.353	0.002784	PAM(rs257309)	0.91	CEU
rs257317	5:103086881-103086881	C	3_prime_UTR_variant,NMD_transcript_variant	MODIFIER	-	-	1.353	0.002784	PAM(rs257309)	0.91	CEU
rs34794	5:103087664-103087664	A	3_prime_UTR_variant	MODIFIER	-	-	5.53	0.409365	PAM(rs257309)	0.783	CEU
rs34794	5:103087664-103087664	A	downstream_gene_variant	MODIFIER	-	-	5.53	0.409365	PAM(rs257309)	0.783	CEU
rs34794	5:103087664-103087664	A	3_prime_UTR_variant,NMD_transcript_variant	MODIFIER	-	-	5.53	0.409365	PAM(rs257309)	0.783	CEU
rs34795	5:103088716-103088716	G	intron_variant	MODIFIER	-	-	1.159	-0.030013	PAM(rs257309)	0.888	CEU
rs34795	5:103088716-103088716	T	intron_variant	MODIFIER	-	-	1.414	0.012259	PAM(rs257309)	0.888	CEU
rs34795	5:103088716-103088716	G	intron_variant,non_coding_transcript_variant	MODIFIER	-	-	1.159	-0.030013	PAM(rs257309)	0.888	CEU
rs34795	5:103088716-103088716	T	intron_variant,non_coding_transcript_variant	MODIFIER	-	-	1.414	0.012259	PAM(rs257309)	0.888	CEU
rs34795	5:103088716-103088716	G	intron_variant,NMD_transcript_variant	MODIFIER	-	-	1.159	-0.030013	PAM(rs257309)	0.888	CEU
rs34795	5:103088716-103088716	T	intron_variant,NMD_transcript_variant	MODIFIER	-	-	1.414	0.012259	PAM(rs257309)	0.888	CEU
rs34796	5:103088725-103088725	C	intron_variant	MODIFIER	-	-	2.101	0.101154	PAM(rs257309)	0.888	CEU
rs34796	5:103088725-103088725	C	intron_variant,non_coding_transcript_variant	MODIFIER	-	-	2.101	0.101154	PAM(rs257309)	0.888	CEU
rs34796	5:103088725-103088725	C	intron_variant,NMD_transcript_variant	MODIFIER	-	-	2.101	0.101154	PAM(rs257309)	0.888	CEU
rs34797	5:103090023-103090023	A	intron_variant	MODIFIER	-	-	2.724	0.164012	PAM(rs257309)	0.783	CEU
rs34797	5:103090023-103090023	C	intron_variant	MODIFIER	-	-	3.266	0.212425	PAM(rs257309)	0.783	CEU
rs34797	5:103090023-103090023	A	intron_variant,non_coding_transcript_variant	MODIFIER	-	-	2.724	0.164012	PAM(rs257309)	0.783	CEU
rs34797	5:103090023-103090023	C	intron_variant,non_coding_transcript_variant	MODIFIER	-	-	3.266	0.212425	PAM(rs257309)	0.783	CEU
rs34797	5:103090023-103090023	A	intron_variant,NMD_transcript_variant	MODIFIER	-	-	2.724	0.164012	PAM(rs257309)	0.783	CEU
rs34797	5:103090023-103090023	C	intron_variant,NMD_transcript_variant	MODIFIER	-	-	3.266	0.212425	PAM(rs257309)	0.783	CEU
rs34798	5:103090047-103090047	A	intron_variant	MODIFIER	-	-	0.78	-0.112744	PAM(rs257309)	0.888	CEU
rs34798	5:103090047-103090047	C	intron_variant	MODIFIER	-	-	0.654	-0.149439	PAM(rs257309)	0.888	CEU
rs34798	5:103090047-103090047	A	intron_variant,non_coding_transcript_variant	MODIFIER	-	-	0.78	-0.112744	PAM(rs257309)	0.888	CEU
rs34798	5:103090047-103090047	C	intron_variant,non_coding_transcript_variant	MODIFIER	-	-	0.654	-0.149439	PAM(rs257309)	0.888	CEU
rs34798	5:103090047-103090047	A	intron_variant,NMD_transcript_variant	MODIFIER	-	-	0.78	-0.112744	PAM(rs257309)	0.888	CEU
rs34798	5:103090047-103090047	C	intron_variant,NMD_transcript_variant	MODIFIER	-	-	0.654	-0.149439	PAM(rs257309)	0.888	CEU
rs34799	5:103090498-103090498	G	intron_variant	MODIFIER	-	-	1.591	0.037969	PAM(rs257309)	0.888	CEU
rs34799	5:103090498-103090498	G	intron_variant,non_coding_transcript_variant	MODIFIER	-	-	1.591	0.037969	PAM(rs257309)	0.888	CEU
rs34799	5:103090498-103090498	G	intron_variant,NMD_transcript_variant	MODIFIER	-	-	1.591	0.037969	PAM(rs257309)	0.888	CEU
rs34800	5:103090799-103090799	A	intron_variant	MODIFIER	-	-	9.274	0.788107	PAM(rs257309)	0.888	CEU
rs34800	5:103090799-103090799	T	intron_variant	MODIFIER	-	-	9.876	0.847631	PAM(rs257309)	0.888	CEU
rs34800	5:103090799-103090799	A	intron_variant,non_coding_transcript_variant	MODIFIER	-	-	9.274	0.788107	PAM(rs257309)	0.888	CEU
rs34800	5:103090799-103090799	T	intron_variant,non_coding_transcript_variant	MODIFIER	-	-	9.876	0.847631	PAM(rs257309)	0.888	CEU
rs34800	5:103090799-103090799	A	intron_variant,NMD_transcript_variant	MODIFIER	-	-	9.274	0.788107	PAM(rs257309)	0.888	CEU
rs34800	5:103090799-103090799	T	intron_variant,NMD_transcript_variant	MODIFIER	-	-	9.876	0.847631	PAM(rs257309)	0.888	CEU
rs34801	5:103090809-103090809	A	intron_variant	MODIFIER	-	-	10.97	0.947336	PAM(rs257309)	0.783	CEU
rs34801	5:103090809-103090809	A	intron_variant,non_coding_transcript_variant	MODIFIER	-	-	10.97	0.947336	PAM(rs257309)	0.783	CEU
rs34801	5:103090809-103090809	A	intron_variant,NMD_transcript_variant	MODIFIER	-	-	10.97	0.947336	PAM(rs257309)	0.783	CEU
rs34802	5:103091301-103091301	C	intron_variant	MODIFIER	-	-	2.95	0.184619	PAM(rs257309)	0.888	CEU
rs34802	5:103091301-103091301	C	intron_variant,non_coding_transcript_variant	MODIFIER	-	-	2.95	0.184619	PAM(rs257309)	0.888	CEU
rs34802	5:103091301-103091301	C	intron_variant,NMD_transcript_variant	MODIFIER	-	-	2.95	0.184619	PAM(rs257309)	0.888	CEU
rs34804	5:103092535-103092535	A	intron_variant	MODIFIER	-	-	0.806	-0.105928	PAM(rs257309)	0.743	CEU
rs34804	5:103092535-103092535	A	intron_variant,non_coding_transcript_variant	MODIFIER	-	-	0.806	-0.105928	PAM(rs257309)	0.743	CEU
rs34804	5:103092535-103092535	A	intron_variant,NMD_transcript_variant	MODIFIER	-	-	0.806	-0.105928	PAM(rs257309)	0.743	CEU
rs34805	5:103092608-103092608	G	intron_variant	MODIFIER	-	-	9.137	0.773983	PAM(rs257309)	0.888	CEU
rs34805	5:103092608-103092608	G	intron_variant,non_coding_transcript_variant	MODIFIER	-	-	9.137	0.773983	PAM(rs257309)	0.888	CEU
rs34805	5:103092608-103092608	G	intron_variant,NMD_transcript_variant	MODIFIER	-	-	9.137	0.773983	PAM(rs257309)	0.888	CEU
rs34806	5:103092733-103092733	A	intron_variant	MODIFIER	-	-	1.42	0.013158	PAM(rs257309)	0.888	CEU
rs34806	5:103092733-103092733	C	intron_variant	MODIFIER	-	-	1.769	0.061571	PAM(rs257309)	0.888	CEU
rs34806	5:103092733-103092733	G	intron_variant	MODIFIER	-	-	1.536	0.030166	PAM(rs257309)	0.888	CEU
rs34806	5:103092733-103092733	A	intron_variant,non_coding_transcript_variant	MODIFIER	-	-	1.42	0.013158	PAM(rs257309)	0.888	CEU
rs34806	5:103092733-103092733	C	intron_variant,non_coding_transcript_variant	MODIFIER	-	-	1.769	0.061571	PAM(rs257309)	0.888	CEU
rs34806	5:103092733-103092733	G	intron_variant,non_coding_transcript_variant	MODIFIER	-	-	1.536	0.030166	PAM(rs257309)	0.888	CEU
rs34806	5:103092733-103092733	A	intron_variant,NMD_transcript_variant	MODIFIER	-	-	1.42	0.013158	PAM(rs257309)	0.888	CEU
rs34806	5:103092733-103092733	C	intron_variant,NMD_transcript_variant	MODIFIER	-	-	1.769	0.061571	PAM(rs257309)	0.888	CEU
rs34806	5:103092733-103092733	G	intron_variant,NMD_transcript_variant	MODIFIER	-	-	1.536	0.030166	PAM(rs257309)	0.888	CEU
rs34807	5:103092818-103092818	C	intron_variant	MODIFIER	-	-	3.179	0.204815	PAM(rs257309)	0.783	CEU
rs34807	5:103092818-103092818	C	intron_variant,non_coding_transcript_variant	MODIFIER	-	-	3.179	0.204815	PAM(rs257309)	0.783	CEU
rs34807	5:103092818-103092818	C	intron_variant,NMD_transcript_variant	MODIFIER	-	-	3.179	0.204815	PAM(rs257309)	0.783	CEU
rs40092	5:103088509-103088509	G	intron_variant	MODIFIER	-	-	8.27	0.680003	PAM(rs257309)	0.783	CEU
rs40092	5:103088509-103088509	G	intron_variant,non_coding_transcript_variant	MODIFIER	-	-	8.27	0.680003	PAM(rs257309)	0.783	CEU
rs40092	5:103088509-103088509	G	intron_variant,NMD_transcript_variant	MODIFIER	-	-	8.27	0.680003	PAM(rs257309)	0.783	CEU
rs40605	5:103091953-103091953	G	intron_variant	MODIFIER	-	-	1.59	0.037749	PAM(rs257309)	0.783	CEU
rs40605	5:103091953-103091953	T	intron_variant	MODIFIER	-	-	1.302	-0.005405	PAM(rs257309)	0.783	CEU
rs40605	5:103091953-103091953	G	intron_variant,non_coding_transcript_variant	MODIFIER	-	-	1.59	0.037749	PAM(rs257309)	0.783	CEU
rs40605	5:103091953-103091953	T	intron_variant,non_coding_transcript_variant	MODIFIER	-	-	1.302	-0.005405	PAM(rs257309)	0.783	CEU
rs40605	5:103091953-103091953	G	intron_variant,NMD_transcript_variant	MODIFIER	-	-	1.59	0.037749	PAM(rs257309)	0.783	CEU
rs40605	5:103091953-103091953	T	intron_variant,NMD_transcript_variant	MODIFIER	-	-	1.302	-0.005405	PAM(rs257309)	0.783	CEU
rs42860	5:103092414-103092414	T	intron_variant	MODIFIER	-	-	5.957	0.448491	PAM(rs257309)	0.888	CEU
rs42860	5:103092414-103092414	T	intron_variant,non_coding_transcript_variant	MODIFIER	-	-	5.957	0.448491	PAM(rs257309)	0.888	CEU
rs42860	5:103092414-103092414	T	intron_variant,NMD_transcript_variant	MODIFIER	-	-	5.957	0.448491	PAM(rs257309)	0.888	CEU
rs444020	5:103092139-103092139	A	intron_variant	MODIFIER	-	-	1.562	0.033833	PAM(rs257309)	0.977	CEU
rs444020	5:103092139-103092139	C	intron_variant	MODIFIER	-	-	1.318	-0.002862	PAM(rs257309)	0.977	CEU
rs444020	5:103092139-103092139	A	intron_variant,non_coding_transcript_variant	MODIFIER	-	-	1.562	0.033833	PAM(rs257309)	0.977	CEU
rs444020	5:103092139-103092139	C	intron_variant,non_coding_transcript_variant	MODIFIER	-	-	1.318	-0.002862	PAM(rs257309)	0.977	CEU
rs444020	5:103092139-103092139	A	intron_variant,NMD_transcript_variant	MODIFIER	-	-	1.562	0.033833	PAM(rs257309)	0.977	CEU
rs444020	5:103092139-103092139	C	intron_variant,NMD_transcript_variant	MODIFIER	-	-	1.318	-0.002862	PAM(rs257309)	0.977	CEU
rs468844	5:103087872-103087872	C	3_prime_UTR_variant	MODIFIER	-	-	7.093	0.557472	PAM(rs257309)	0.888	CEU
rs468844	5:103087872-103087872	G	3_prime_UTR_variant	MODIFIER	-	-	7.387	0.58714	PAM(rs257309)	0.888	CEU
rs468844	5:103087872-103087872	C	non_coding_transcript_exon_variant	MODIFIER	-	-	7.093	0.557472	PAM(rs257309)	0.888	CEU
rs468844	5:103087872-103087872	G	non_coding_transcript_exon_variant	MODIFIER	-	-	7.387	0.58714	PAM(rs257309)	0.888	CEU
rs468844	5:103087872-103087872	C	3_prime_UTR_variant,NMD_transcript_variant	MODIFIER	-	-	7.093	0.557472	PAM(rs257309)	0.888	CEU
rs468844	5:103087872-103087872	G	3_prime_UTR_variant,NMD_transcript_variant	MODIFIER	-	-	7.387	0.58714	PAM(rs257309)	0.888	CEU
rs468844	5:103087872-103087872	C	downstream_gene_variant	MODIFIER	-	-	7.093	0.557472	PAM(rs257309)	0.888	CEU
rs468844	5:103087872-103087872	G	downstream_gene_variant	MODIFIER	-	-	7.387	0.58714	PAM(rs257309)	0.888	CEU
rs469094	5:103087875-103087875	C	3_prime_UTR_variant	MODIFIER	-	-	7.35	0.583306	PAM(rs257309)	0.888	CEU
rs469094	5:103087875-103087875	G	3_prime_UTR_variant	MODIFIER	-	-	7.638	0.612974	PAM(rs257309)	0.888	CEU
rs469094	5:103087875-103087875	C	non_coding_transcript_exon_variant	MODIFIER	-	-	7.35	0.583306	PAM(rs257309)	0.888	CEU
rs469094	5:103087875-103087875	G	non_coding_transcript_exon_variant	MODIFIER	-	-	7.638	0.612974	PAM(rs257309)	0.888	CEU
rs469094	5:103087875-103087875	C	3_prime_UTR_variant,NMD_transcript_variant	MODIFIER	-	-	7.35	0.583306	PAM(rs257309)	0.888	CEU
rs469094	5:103087875-103087875	G	3_prime_UTR_variant,NMD_transcript_variant	MODIFIER	-	-	7.638	0.612974	PAM(rs257309)	0.888	CEU
rs469094	5:103087875-103087875	C	downstream_gene_variant	MODIFIER	-	-	7.35	0.583306	PAM(rs257309)	0.888	CEU
rs469094	5:103087875-103087875	G	downstream_gene_variant	MODIFIER	-	-	7.638	0.612974	PAM(rs257309)	0.888	CEU
rs565030289	5:103089457-103089457	C	intron_variant	MODIFIER	-	-	5.106	0.371305	PAM(rs257309)	0.383	CEU
rs565030289	5:103089457-103089457	C	intron_variant,non_coding_transcript_variant	MODIFIER	-	-	5.106	0.371305	PAM(rs257309)	0.383	CEU
rs565030289	5:103089457-103089457	C	intron_variant,NMD_transcript_variant	MODIFIER	-	-	5.106	0.371305	PAM(rs257309)	0.383	CEU
rs57619412	5:103089465-103089465	T	intron_variant	MODIFIER	-	-	1.923	0.080564	PAM(rs257309)	0.783	CEU
rs57619412	5:103089465-103089465	T	intron_variant,non_coding_transcript_variant	MODIFIER	-	-	1.923	0.080564	PAM(rs257309)	0.783	CEU
rs57619412	5:103089465-103089465	T	intron_variant,NMD_transcript_variant	MODIFIER	-	-	1.923	0.080564	PAM(rs257309)	0.783	CEU
rs60269153	5:103089461-103089461	C	intron_variant	MODIFIER	-	-	4.496	0.317872	PAM(rs257309)	0.783	CEU
rs60269153	5:103089461-103089461	C	intron_variant,non_coding_transcript_variant	MODIFIER	-	-	4.496	0.317872	PAM(rs257309)	0.783	CEU
rs60269153	5:103089461-103089461	C	intron_variant,NMD_transcript_variant	MODIFIER	-	-	4.496	0.317872	PAM(rs257309)	0.783	CEU
rs858518	17:7629707-7629707	A	upstream_gene_variant	MODIFIER	-	-	0.67	-0.144591	SHBG(rs858519)	0.96	CEU
rs858518	17:7629707-7629707	T	upstream_gene_variant	MODIFIER	-	-	0.528	-0.193445	SHBG(rs858519)	0.96	CEU
rs858518	17:7629707-7629707	A	intron_variant	MODIFIER	-	-	0.67	-0.144591	SHBG(rs858519)	0.96	CEU
rs858518	17:7629707-7629707	T	intron_variant	MODIFIER	-	-	0.528	-0.193445	SHBG(rs858519)	0.96	CEU
rs858518	17:7629707-7629707	A	upstream_gene_variant	MODIFIER	-	-	0.67	-0.144591	SHBG(rs858519)	0.96	CEU
rs858516	17:7633780-7633780	G	downstream_gene_variant	MODIFIER	-	-	0.802	-0.107097	SHBG(rs858519)	1	CEU
rs858516	17:7633780-7633780	T	downstream_gene_variant	MODIFIER	-	-	0.981	-0.064824	SHBG(rs858519)	1	CEU
rs858516	17:7633780-7633780	G	regulatory_region_variant	MODIFIER	-	-	0.802	-0.107097	SHBG(rs858519)	1	CEU
rs858516	17:7633780-7633780	T	regulatory_region_variant	MODIFIER	-	-	0.981	-0.064824	SHBG(rs858519)	1	CEU
rs727428	17:7634474-7634474	A	downstream_gene_variant	MODIFIER	-	-	11.13	0.960401	SHBG(rs858519)	1	CEU
rs727428	17:7634474-7634474	C	downstream_gene_variant	MODIFIER	-	-	11.73	1.00881	SHBG(rs858519)	1	CEU
rs727428	17:7634474-7634474	A	regulatory_region_variant	MODIFIER	-	-	11.13	0.960401	SHBG(rs858519)	1	CEU
rs727428	17:7634474-7634474	C	regulatory_region_variant	MODIFIER	-	-	11.73	1.00881	SHBG(rs858519)	1	CEU
rs2955617	17:7635467-7635467	A	downstream_gene_variant	MODIFIER	-	-	6.045	0.456667	SHBG(rs858519)	0.688	CEU
rs2955617	17:7635467-7635467	T	downstream_gene_variant	MODIFIER	-	-	6.673	0.516192	SHBG(rs858519)	0.688	CEU
rs34370369	17:7637203-7637203	T	downstream_gene_variant	MODIFIER	-	-	2.549	0.14741	SHBG(rs858519)	0.539	CEU
rs11351634	7:44125898-44125900	TTTTTTTT	upstream_gene_variant	MODIFIER	-	-	0.822	-0.101896	DBNL(rs3087367)	0.342	CEU
rs11351634	7:44125898-44125900	TTTTTTTTT	upstream_gene_variant	MODIFIER	-	-	0.832	-0.09923	DBNL(rs3087367)	0.342	CEU
rs11351634	7:44125898-44125900	TTTTTTTTTTT	upstream_gene_variant	MODIFIER	-	-	1.066	-0.0474	DBNL(rs3087367)	0.342	CEU
rs11351634	7:44125898-44125900	TTTTTTTTTTTT	upstream_gene_variant	MODIFIER	-	-	-	-	DBNL(rs3087367)	0.342	CEU
rs113784062	7:44126070-44126070	A	upstream_gene_variant	MODIFIER	-	-	0.605	-0.165521	DBNL(rs3087367)	0.458	CEU
rs113784062	7:44126070-44126070	T	upstream_gene_variant	MODIFIER	-	-	0.806	-0.105996	DBNL(rs3087367)	0.458	CEU
rs140257648	7:44124820-44124820	ATATTTTAATTTAAAATGTGATATTTTAATTTAAAATGTGATATTTTAATT	upstream_gene_variant	MODIFIER	-	-	5.466	0.403551	DBNL(rs3087367)	0.34	CEU
rs140257648	7:44124820-44124820	ATATTTTAATTTAAAATGTGATATTTTAATTTAAAATGTGATATTTTAATTTAAAATGTGATATTTTAATT	upstream_gene_variant	MODIFIER	-	-	4.5	0.318213	DBNL(rs3087367)	0.34	CEU
rs140257648	7:44124820-44124820	ATATTTTAATTTAAAATGTGATATTTTAATTTAAAATGTGATATTTTAATT	downstream_gene_variant	MODIFIER	-	-	5.466	0.403551	DBNL(rs3087367)	0.34	CEU
rs140257648	7:44124820-44124820	ATATTTTAATTTAAAATGTGATATTTTAATTTAAAATGTGATATTTTAATTTAAAATGTGATATTTTAATT	downstream_gene_variant	MODIFIER	-	-	4.5	0.318213	DBNL(rs3087367)	0.34	CEU
rs140257648	7:44124820-44124820	ATATTTTAATTTAAAATGTGATATTTTAATTTAAAATGTGATATTTTAATT	regulatory_region_variant	MODIFIER	-	-	5.466	0.403551	DBNL(rs3087367)	0.34	CEU
rs140257648	7:44124820-44124820	ATATTTTAATTTAAAATGTGATATTTTAATTTAAAATGTGATATTTTAATTTAAAATGTGATATTTTAATT	regulatory_region_variant	MODIFIER	-	-	4.5	0.318213	DBNL(rs3087367)	0.34	CEU
rs2908280	7:44119625-44119625	C	intron_variant	MODIFIER	-	-	1.339	0.000632	DBNL(rs3087367)	0.777	CEU
rs2908280	7:44119625-44119625	C	upstream_gene_variant	MODIFIER	-	-	1.339	0.000632	DBNL(rs3087367)	0.777	CEU
rs2908280	7:44119625-44119625	C	intron_variant,non_coding_transcript_variant	MODIFIER	-	-	1.339	0.000632	DBNL(rs3087367)	0.777	CEU
rs2908280	7:44119625-44119625	C	downstream_gene_variant	MODIFIER	-	-	1.339	0.000632	DBNL(rs3087367)	0.777	CEU
rs2922665	7:44125863-44125863	T	upstream_gene_variant	MODIFIER	-	-	7.558	0.604686	DBNL(rs3087367)	0.614	CEU
rs2922665	7:44125863-44125863	T	non_coding_transcript_exon_variant	MODIFIER	-	-	7.558	0.604686	DBNL(rs3087367)	0.614	CEU
rs2979424	7:44118613-44118613	A	downstream_gene_variant	MODIFIER	-	-	0.702	-0.134964	DBNL(rs3087367)	0.799	CEU
rs2979424	7:44118613-44118613	T	downstream_gene_variant	MODIFIER	-	-	0.933	-0.07544	DBNL(rs3087367)	0.799	CEU
rs2979424	7:44118613-44118613	A	intron_variant	MODIFIER	-	-	0.702	-0.134964	DBNL(rs3087367)	0.799	CEU
rs2979424	7:44118613-44118613	T	intron_variant	MODIFIER	-	-	0.933	-0.07544	DBNL(rs3087367)	0.799	CEU
rs2979424	7:44118613-44118613	A	upstream_gene_variant	MODIFIER	-	-	0.702	-0.134964	DBNL(rs3087367)	0.799	CEU
rs2979424	7:44118613-44118613	T	upstream_gene_variant	MODIFIER	-	-	0.933	-0.07544	DBNL(rs3087367)	0.799	CEU
rs2979424	7:44118613-44118613	A	intron_variant,non_coding_transcript_variant	MODIFIER	-	-	0.702	-0.134964	DBNL(rs3087367)	0.799	CEU
rs2979424	7:44118613-44118613	T	intron_variant,non_coding_transcript_variant	MODIFIER	-	-	0.933	-0.07544	DBNL(rs3087367)	0.799	CEU
rs3087370	7:44122210-44122210	C	upstream_gene_variant	MODIFIER	-	-	14.02	1.24998	DBNL(rs3087367)	0.471	CEU
rs3087370	7:44122210-44122210	G	upstream_gene_variant	MODIFIER	-	-	10.94	0.945081	DBNL(rs3087367)	0.471	CEU
rs3087370	7:44122210-44122210	C	intron_variant	MODIFIER	-	-	14.02	1.24998	DBNL(rs3087367)	0.471	CEU
rs3087370	7:44122210-44122210	G	intron_variant	MODIFIER	-	-	10.94	0.945081	DBNL(rs3087367)	0.471	CEU
rs3087370	7:44122210-44122210	C	5_prime_UTR_variant	MODIFIER	-	-	14.02	1.24998	DBNL(rs3087367)	0.471	CEU
rs3087370	7:44122210-44122210	G	5_prime_UTR_variant	MODIFIER	-	-	10.94	0.945081	DBNL(rs3087367)	0.471	CEU
rs3087370	7:44122210-44122210	C	intron_variant,non_coding_transcript_variant	MODIFIER	-	-	14.02	1.24998	DBNL(rs3087367)	0.471	CEU
rs3087370	7:44122210-44122210	G	intron_variant,non_coding_transcript_variant	MODIFIER	-	-	10.94	0.945081	DBNL(rs3087367)	0.471	CEU
rs3087370	7:44122210-44122210	C	downstream_gene_variant	MODIFIER	-	-	14.02	1.24998	DBNL(rs3087367)	0.471	CEU
rs3087370	7:44122210-44122210	G	downstream_gene_variant	MODIFIER	-	-	10.94	0.945081	DBNL(rs3087367)	0.471	CEU
rs3087370	7:44122210-44122210	C	regulatory_region_variant	MODIFIER	-	-	14.02	1.24998	DBNL(rs3087367)	0.471	CEU
rs3087370	7:44122210-44122210	G	regulatory_region_variant	MODIFIER	-	-	10.94	0.945081	DBNL(rs3087367)	0.471	CEU
rs3217943	7:44124492-44124492	C	upstream_gene_variant	MODIFIER	-	-	7.552	0.604039	DBNL(rs3087367)	0.458	CEU
rs3217943	7:44124492-44124492	C	downstream_gene_variant	MODIFIER	-	-	7.552	0.604039	DBNL(rs3087367)	0.458	CEU
rs3217943	7:44124492-44124492	C	regulatory_region_variant	MODIFIER	-	-	7.552	0.604039	DBNL(rs3087367)	0.458	CEU
rs3217944	7:44124463-44124463	A	upstream_gene_variant	MODIFIER	-	-	0.706	-0.133572	DBNL(rs3087367)	0.422	CEU
rs3217944	7:44124463-44124463	A	downstream_gene_variant	MODIFIER	-	-	0.706	-0.133572	DBNL(rs3087367)	0.422	CEU
rs3217944	7:44124463-44124463	A	regulatory_region_variant	MODIFIER	-	-	0.706	-0.133572	DBNL(rs3087367)	0.422	CEU
rs3217962	7:44118379-44118379	G	downstream_gene_variant	MODIFIER	-	-	0.024	-0.805979	DBNL(rs3087367)	1	CEU
rs3217962	7:44118379-44118379	G	intron_variant	MODIFIER	-	-	0.024	-0.805979	DBNL(rs3087367)	1	CEU
rs3217962	7:44118379-44118379	G	upstream_gene_variant	MODIFIER	-	-	0.024	-0.805979	DBNL(rs3087367)	1	CEU
rs3217962	7:44118379-44118379	G	intron_variant,non_coding_transcript_variant	MODIFIER	-	-	0.024	-0.805979	DBNL(rs3087367)	1	CEU
rs3217964	7:44118226-44118226	C	downstream_gene_variant	MODIFIER	-	-	8.105	0.662267	DBNL(rs3087367)	0.471	CEU
rs3217964	7:44118226-44118226	C	intron_variant	MODIFIER	-	-	8.105	0.662267	DBNL(rs3087367)	0.471	CEU
rs3217964	7:44118226-44118226	C	upstream_gene_variant	MODIFIER	-	-	8.105	0.662267	DBNL(rs3087367)	0.471	CEU
rs3217964	7:44118226-44118226	C	intron_variant,non_coding_transcript_variant	MODIFIER	-	-	8.105	0.662267	DBNL(rs3087367)	0.471	CEU
rs3217964	7:44118226-44118226	C	non_coding_transcript_exon_variant	MODIFIER	-	-	8.105	0.662267	DBNL(rs3087367)	0.471	CEU
rs1405628	1:236244165-236244165	A	intron_variant	MODIFIER	-	-	2.12	0.103212	ERO1LB(rs1254194)	0.586	CEU
rs1405628	1:236244165-236244165	G	intron_variant	MODIFIER	-	-	2.278	0.12022	ERO1LB(rs1254194)	0.586	CEU
rs2463199	1:236241341-236241341	C	intron_variant	MODIFIER	-	-	1.871	0.074282	ERO1LB(rs1254194)	0.586	CEU
rs2463200	1:236241420-236241420	C	intron_variant	MODIFIER	-	-	0.81	-0.105035	ERO1LB(rs1254194)	0.586	CEU
rs2463200	1:236241420-236241420	G	intron_variant	MODIFIER	-	-	0.697	-0.136441	ERO1LB(rs1254194)	0.586	CEU
rs2463201	1:236242197-236242197	A	intron_variant	MODIFIER	-	-	10.22	0.880046	ERO1LB(rs1254194)	0.979	CEU
rs2463201	1:236242197-236242197	C	intron_variant	MODIFIER	-	-	10.74	0.92846	ERO1LB(rs1254194)	0.979	CEU
rs2695056	1:236241081-236241081	A	intron_variant	MODIFIER	-	-	14.07	1.25723	ERO1LB(rs1254194)	0.517	CEU
rs2695056	1:236241081-236241081	C	intron_variant	MODIFIER	-	-	13.8	1.22053	ERO1LB(rs1254194)	0.517	CEU
rs2695056	1:236241081-236241081	T	intron_variant	MODIFIER	-	-	13.7	1.20837	ERO1LB(rs1254194)	0.517	CEU
rs2695057	1:236241091-236241091	A	intron_variant	MODIFIER	-	-	5.268	0.3858	ERO1LB(rs1254194)	0.517	CEU
rs2695057	1:236241091-236241091	T	intron_variant	MODIFIER	-	-	5.923	0.445325	ERO1LB(rs1254194)	0.517	CEU
rs2695058	1:236241234-236241234	A	intron_variant	MODIFIER	-	-	7.027	0.550902	ERO1LB(rs1254194)	0.517	CEU
rs2695058	1:236241234-236241234	G	intron_variant	MODIFIER	-	-	7.2	0.568154	ERO1LB(rs1254194)	0.517	CEU
rs2695059	1:236242617-236242617	A	intron_variant	MODIFIER	-	-	0.915	-0.07936	ERO1LB(rs1254194)	0.517	CEU
rs2695060	1:236242626-236242626	T	intron_variant	MODIFIER	-	-	3.175	0.204522	ERO1LB(rs1254194)	0.586	CEU
rs2695061	1:236243293-236243293	C	intron_variant	MODIFIER	-	-	8.518	0.70682	ERO1LB(rs1254194)	0.517	CEU
rs2812455	1:236238470-236238470	A	intron_variant	MODIFIER	-	-	0.534	-0.19111	ERO1LB(rs1254194)	0.504	CEU
rs67004401	1:236241703-236241704	GGG	intron_variant	MODIFIER	-	-	3.494	0.232003	ERO1LB(rs1254194)	0.517	CEU
rs67985500	1:236239790-236239798	TATATATAT	intron_variant	MODIFIER	-	-	8.054	0.656775	ERO1LB(rs1254194)	0.37	CEU
rs67985500	1:236239790-236239798	TATATATATAT	intron_variant	MODIFIER	-	-	8.13	0.664924	ERO1LB(rs1254194)	0.37	CEU
rs67985500	1:236239790-236239798	TATATATATATAT	intron_variant	MODIFIER	-	-	8.212	0.673707	ERO1LB(rs1254194)	0.37	CEU
rs67985500	1:236239790-236239798	TATATATATATATAT	intron_variant	MODIFIER	-	-	8.202	0.672671	ERO1LB(rs1254194)	0.37	CEU
rs67985500	1:236239790-236239798	TATATATATATATATATAT	intron_variant	MODIFIER	-	-	8.761	0.733445	ERO1LB(rs1254194)	0.37	CEU
rs67985500	1:236239790-236239798	TATATATATATATATATATAT	intron_variant	MODIFIER	-	-	8.683	0.724911	ERO1LB(rs1254194)	0.37	CEU
rs67985500	1:236239790-236239798	TATATATATATATATATATATAT	intron_variant	MODIFIER	-	-	8.605	0.716378	ERO1LB(rs1254194)	0.37	CEU
rs67985500	1:236239790-236239798	TATATATATATATATATATATATAT	intron_variant	MODIFIER	-	-	8.527	0.707844	ERO1LB(rs1254194)	0.37	CEU
rs67985500	1:236239790-236239798	TATATATATATATATATATATATATAT	intron_variant	MODIFIER	-	-	8.449	0.69931	ERO1LB(rs1254194)	0.37	CEU
rs71642839	1:236241701-236241701	C	intron_variant	MODIFIER	-	-	11.44	0.985364	ERO1LB(rs1254194)	0.517	CEU
rs72030246	1:236245343-236245347	TATATA	intron_variant	MODIFIER	-	-	0.715	-0.131205	ERO1LB(rs1254194)	0.325	CEU
rs72030246	1:236245343-236245347	TATATATATATA	intron_variant	MODIFIER	-	-	-	-	ERO1LB(rs1254194)	0.325	CEU
rs72304484	1:236241557-236241562	CAAA	intron_variant	MODIFIER	-	-	0.484	-0.211022	ERO1LB(rs1254194)	0.586	CEU
rs72304484	1:236241557-236241562	CAAATCAAATCAAA	intron_variant	MODIFIER	-	-	-	-	ERO1LB(rs1254194)	0.586	CEU
rs78165751	1:236241388-236241389	AAAAAAAAAA	intron_variant	MODIFIER	-	-	0.429	-0.235088	ERO1LB(rs1254194)	0.6	CEU
rs78165751	1:236241388-236241389	AAAAAAAAAAAA	intron_variant	MODIFIER	-	-	0.78	-0.112999	ERO1LB(rs1254194)	0.6	CEU
rs10802710	1:235433366-235433366	A	intron_variant	MODIFIER	-	-	0.296	-0.310357	TBCE(rs10802708)	0.665	CEU
rs10802710	1:235433366-235433366	A	intron_variant,NMD_transcript_variant	MODIFIER	-	-	0.296	-0.310357	TBCE(rs10802708)	0.665	CEU
rs10802710	1:235433366-235433366	C	intron_variant,NMD_transcript_variant	MODIFIER	-	-	0.236	-0.357632	TBCE(rs10802708)	0.665	CEU
rs10802710	1:235433366-235433366	T	intron_variant,NMD_transcript_variant	MODIFIER	-	-	0.239	-0.354401	TBCE(rs10802708)	0.665	CEU
rs10802710	1:235433366-235433366	A	non_coding_transcript_exon_variant	MODIFIER	-	-	0.296	-0.310357	TBCE(rs10802708)	0.665	CEU
rs10802710	1:235433366-235433366	C	non_coding_transcript_exon_variant	MODIFIER	-	-	0.236	-0.357632	TBCE(rs10802708)	0.665	CEU
rs10802710	1:235433366-235433366	C	intron_variant	MODIFIER	-	-	0.236	-0.357632	TBCE(rs10802708)	0.665	CEU
rs10802710	1:235433366-235433366	T	intron_variant	MODIFIER	-	-	0.239	-0.354401	TBCE(rs10802708)	0.665	CEU
rs10802710	1:235433366-235433366	A	downstream_gene_variant	MODIFIER	-	-	0.296	-0.310357	TBCE(rs10802708)	0.665	CEU
rs10802710	1:235433366-235433366	C	downstream_gene_variant	MODIFIER	-	-	0.236	-0.357632	TBCE(rs10802708)	0.665	CEU
rs10802710	1:235433366-235433366	T	downstream_gene_variant	MODIFIER	-	-	0.239	-0.354401	TBCE(rs10802708)	0.665	CEU
rs10802710	1:235433366-235433366	A	intron_variant,non_coding_transcript_variant	MODIFIER	-	-	0.296	-0.310357	TBCE(rs10802708)	0.665	CEU
rs10802710	1:235433366-235433366	C	intron_variant,non_coding_transcript_variant	MODIFIER	-	-	0.236	-0.357632	TBCE(rs10802708)	0.665	CEU
rs10802710	1:235433366-235433366	T	intron_variant,non_coding_transcript_variant	MODIFIER	-	-	0.239	-0.354401	TBCE(rs10802708)	0.665	CEU
rs10802710	CHR_HSCHR1_5_CTG32_1:235437157-235437157	A	downstream_gene_variant	MODIFIER	-	-	-	-	TBCE(rs10802708)	0.665	CEU
rs10802710	CHR_HSCHR1_5_CTG32_1:235437157-235437157	C	downstream_gene_variant	MODIFIER	-	-	-	-	TBCE(rs10802708)	0.665	CEU
rs10802710	CHR_HSCHR1_5_CTG32_1:235437157-235437157	T	downstream_gene_variant	MODIFIER	-	-	-	-	TBCE(rs10802708)	0.665	CEU
rs10802710	CHR_HSCHR1_5_CTG32_1:235437157-235437157	A	intron_variant	MODIFIER	-	-	-	-	TBCE(rs10802708)	0.665	CEU
rs10802710	CHR_HSCHR1_5_CTG32_1:235437157-235437157	C	intron_variant	MODIFIER	-	-	-	-	TBCE(rs10802708)	0.665	CEU
rs10802710	CHR_HSCHR1_5_CTG32_1:235437157-235437157	T	intron_variant	MODIFIER	-	-	-	-	TBCE(rs10802708)	0.665	CEU
rs10802710	CHR_HSCHR1_5_CTG32_1:235437157-235437157	A	intron_variant,NMD_transcript_variant	MODIFIER	-	-	-	-	TBCE(rs10802708)	0.665	CEU
rs10802710	CHR_HSCHR1_5_CTG32_1:235437157-235437157	C	intron_variant,NMD_transcript_variant	MODIFIER	-	-	-	-	TBCE(rs10802708)	0.665	CEU
rs10802710	CHR_HSCHR1_5_CTG32_1:235437157-235437157	T	intron_variant,NMD_transcript_variant	MODIFIER	-	-	-	-	TBCE(rs10802708)	0.665	CEU
rs10802710	1:235433366-235433366	T	upstream_gene_variant	MODIFIER	-	-	0.239	-0.354401	TBCE(rs10802708)	0.665	CEU
rs10802710	1:235433366-235433366	T	non_coding_transcript_exon_variant	MODIFIER	-	-	0.239	-0.354401	TBCE(rs10802708)	0.665	CEU
rs10802710	1:235433366-235433366	A	upstream_gene_variant	MODIFIER	-	-	0.296	-0.310357	TBCE(rs10802708)	0.665	CEU
rs10802710	1:235433366-235433366	C	upstream_gene_variant	MODIFIER	-	-	0.236	-0.357632	TBCE(rs10802708)	0.665	CEU
rs12405889	CHR_HSCHR1_5_CTG32_1:235437728-235437728	G	downstream_gene_variant	MODIFIER	-	-	-	-	TBCE(rs10802708)	0.707	CEU
rs12405889	CHR_HSCHR1_5_CTG32_1:235437728-235437728	G	intron_variant,NMD_transcript_variant	MODIFIER	-	-	-	-	TBCE(rs10802708)	0.707	CEU
rs12405889	CHR_HSCHR1_5_CTG32_1:235437728-235437728	A	intron_variant	MODIFIER	-	-	-	-	TBCE(rs10802708)	0.707	CEU
rs12405889	CHR_HSCHR1_5_CTG32_1:235437728-235437728	G	intron_variant	MODIFIER	-	-	-	-	TBCE(rs10802708)	0.707	CEU
rs12405889	CHR_HSCHR1_5_CTG32_1:235437728-235437728	A	intron_variant,NMD_transcript_variant	MODIFIER	-	-	-	-	TBCE(rs10802708)	0.707	CEU
rs12405889	1:235433937-235433937	A	non_coding_transcript_exon_variant	MODIFIER	-	-	0.05	-0.675562	TBCE(rs10802708)	0.707	CEU
rs12405889	1:235433937-235433937	G	intron_variant,non_coding_transcript_variant	MODIFIER	-	-	0.054	-0.658554	TBCE(rs10802708)	0.707	CEU
rs12405889	1:235433937-235433937	A	intron_variant,NMD_transcript_variant	MODIFIER	-	-	0.05	-0.675562	TBCE(rs10802708)	0.707	CEU
rs12405889	1:235433937-235433937	G	intron_variant,NMD_transcript_variant	MODIFIER	-	-	0.054	-0.658554	TBCE(rs10802708)	0.707	CEU
rs12405889	CHR_HSCHR1_5_CTG32_1:235437728-235437728	A	downstream_gene_variant	MODIFIER	-	-	-	-	TBCE(rs10802708)	0.707	CEU
rs12405889	1:235433937-235433937	A	intron_variant	MODIFIER	-	-	0.05	-0.675562	TBCE(rs10802708)	0.707	CEU
rs12405889	1:235433937-235433937	G	intron_variant	MODIFIER	-	-	0.054	-0.658554	TBCE(rs10802708)	0.707	CEU
rs12405889	1:235433937-235433937	A	downstream_gene_variant	MODIFIER	-	-	0.05	-0.675562	TBCE(rs10802708)	0.707	CEU
rs12405889	1:235433937-235433937	G	downstream_gene_variant	MODIFIER	-	-	0.054	-0.658554	TBCE(rs10802708)	0.707	CEU
rs12405889	1:235433937-235433937	A	intron_variant,non_coding_transcript_variant	MODIFIER	-	-	0.05	-0.675562	TBCE(rs10802708)	0.707	CEU
rs12405889	1:235433937-235433937	G	non_coding_transcript_exon_variant	MODIFIER	-	-	0.054	-0.658554	TBCE(rs10802708)	0.707	CEU
rs12405889	1:235433937-235433937	A	upstream_gene_variant	MODIFIER	-	-	0.05	-0.675562	TBCE(rs10802708)	0.707	CEU
rs12405889	1:235433937-235433937	G	upstream_gene_variant	MODIFIER	-	-	0.054	-0.658554	TBCE(rs10802708)	0.707	CEU
rs2055127	1:235435658-235435658	T	intron_variant	MODIFIER	-	-	0.317	-0.296416	TBCE(rs10802708)	0.619	CEU
rs2055127	CHR_HSCHR1_5_CTG32_1:235439449-235439449	T	downstream_gene_variant	MODIFIER	-	-	-	-	TBCE(rs10802708)	0.619	CEU
rs2055127	CHR_HSCHR1_5_CTG32_1:235439449-235439449	T	intron_variant	MODIFIER	-	-	-	-	TBCE(rs10802708)	0.619	CEU
rs2055127	CHR_HSCHR1_5_CTG32_1:235439449-235439449	T	intron_variant,NMD_transcript_variant	MODIFIER	-	-	-	-	TBCE(rs10802708)	0.619	CEU
rs2055127	1:235435658-235435658	T	downstream_gene_variant	MODIFIER	-	-	0.317	-0.296416	TBCE(rs10802708)	0.619	CEU
rs2055127	1:235435658-235435658	T	intron_variant,non_coding_transcript_variant	MODIFIER	-	-	0.317	-0.296416	TBCE(rs10802708)	0.619	CEU
rs2055127	1:235435658-235435658	T	intron_variant,NMD_transcript_variant	MODIFIER	-	-	0.317	-0.296416	TBCE(rs10802708)	0.619	CEU
rs2270538	1:235439089-235439089	A	intron_variant	MODIFIER	-	-	0.068	-0.612485	TBCE(rs10802708)	0.918	CEU
rs2270538	1:235439089-235439089	C	upstream_gene_variant	MODIFIER	-	-	0.057	-0.647188	TBCE(rs10802708)	0.918	CEU
rs2270538	1:235439089-235439089	A	intron_variant,non_coding_transcript_variant	MODIFIER	-	-	0.068	-0.612485	TBCE(rs10802708)	0.918	CEU
rs2270538	1:235439089-235439089	C	intron_variant	MODIFIER	-	-	0.057	-0.647188	TBCE(rs10802708)	0.918	CEU
rs2270538	1:235439089-235439089	A	upstream_gene_variant	MODIFIER	-	-	0.068	-0.612485	TBCE(rs10802708)	0.918	CEU
rs2270538	CHR_HSCHR1_5_CTG32_1:235442880-235442880	A	intron_variant	MODIFIER	-	-	-	-	TBCE(rs10802708)	0.918	CEU
rs2270538	CHR_HSCHR1_5_CTG32_1:235442880-235442880	C	intron_variant	MODIFIER	-	-	-	-	TBCE(rs10802708)	0.918	CEU
rs2270538	CHR_HSCHR1_5_CTG32_1:235442880-235442880	A	intron_variant,NMD_transcript_variant	MODIFIER	-	-	-	-	TBCE(rs10802708)	0.918	CEU
rs2270538	CHR_HSCHR1_5_CTG32_1:235442880-235442880	C	intron_variant,NMD_transcript_variant	MODIFIER	-	-	-	-	TBCE(rs10802708)	0.918	CEU
rs2270538	CHR_HSCHR1_5_CTG32_1:235442880-235442880	A	downstream_gene_variant	MODIFIER	-	-	-	-	TBCE(rs10802708)	0.918	CEU
rs2270538	CHR_HSCHR1_5_CTG32_1:235442880-235442880	C	downstream_gene_variant	MODIFIER	-	-	-	-	TBCE(rs10802708)	0.918	CEU
rs2270538	1:235439089-235439089	C	downstream_gene_variant	MODIFIER	-	-	0.057	-0.647188	TBCE(rs10802708)	0.918	CEU
rs2270538	1:235439089-235439089	A	intron_variant,NMD_transcript_variant	MODIFIER	-	-	0.068	-0.612485	TBCE(rs10802708)	0.918	CEU
rs2270538	1:235439089-235439089	C	intron_variant,non_coding_transcript_variant	MODIFIER	-	-	0.057	-0.647188	TBCE(rs10802708)	0.918	CEU
rs2270538	1:235439089-235439089	A	downstream_gene_variant	MODIFIER	-	-	0.068	-0.612485	TBCE(rs10802708)	0.918	CEU
rs2270538	1:235439089-235439089	C	intron_variant,NMD_transcript_variant	MODIFIER	-	-	0.057	-0.647188	TBCE(rs10802708)	0.918	CEU
rs3765799	1:235438366-235438366	A	intron_variant	MODIFIER	-	-	1.039	-0.052746	TBCE(rs10802708)	0.959	CEU
rs3765799	1:235438366-235438366	T	intron_variant	MODIFIER	-	-	1.378	0.006779	TBCE(rs10802708)	0.959	CEU
rs3765799	1:235438366-235438366	A	upstream_gene_variant	MODIFIER	-	-	1.039	-0.052746	TBCE(rs10802708)	0.959	CEU
rs3765799	1:235438366-235438366	G	upstream_gene_variant	MODIFIER	-	-	1.129	-0.035494	TBCE(rs10802708)	0.959	CEU
rs3765799	1:235438366-235438366	G	intron_variant	MODIFIER	-	-	1.129	-0.035494	TBCE(rs10802708)	0.959	CEU
rs3765799	1:235438366-235438366	A	intron_variant,non_coding_transcript_variant	MODIFIER	-	-	1.039	-0.052746	TBCE(rs10802708)	0.959	CEU
rs3765799	1:235438366-235438366	G	intron_variant,non_coding_transcript_variant	MODIFIER	-	-	1.129	-0.035494	TBCE(rs10802708)	0.959	CEU
rs3765799	1:235438366-235438366	T	intron_variant,non_coding_transcript_variant	MODIFIER	-	-	1.378	0.006779	TBCE(rs10802708)	0.959	CEU
rs3765799	1:235438366-235438366	T	upstream_gene_variant	MODIFIER	-	-	1.378	0.006779	TBCE(rs10802708)	0.959	CEU
rs3765799	1:235438366-235438366	G	downstream_gene_variant	MODIFIER	-	-	1.129	-0.035494	TBCE(rs10802708)	0.959	CEU
rs3765799	1:235438366-235438366	T	downstream_gene_variant	MODIFIER	-	-	1.378	0.006779	TBCE(rs10802708)	0.959	CEU
rs3765799	1:235438366-235438366	A	intron_variant,NMD_transcript_variant	MODIFIER	-	-	1.039	-0.052746	TBCE(rs10802708)	0.959	CEU
rs3765799	1:235438366-235438366	G	intron_variant,NMD_transcript_variant	MODIFIER	-	-	1.129	-0.035494	TBCE(rs10802708)	0.959	CEU
rs3765799	1:235438366-235438366	T	intron_variant,NMD_transcript_variant	MODIFIER	-	-	1.378	0.006779	TBCE(rs10802708)	0.959	CEU
rs3765799	CHR_HSCHR1_5_CTG32_1:235442157-235442157	T	intron_variant,NMD_transcript_variant	MODIFIER	-	-	-	-	TBCE(rs10802708)	0.959	CEU
rs3765799	CHR_HSCHR1_5_CTG32_1:235442157-235442157	A	downstream_gene_variant	MODIFIER	-	-	-	-	TBCE(rs10802708)	0.959	CEU
rs3765799	CHR_HSCHR1_5_CTG32_1:235442157-235442157	G	downstream_gene_variant	MODIFIER	-	-	-	-	TBCE(rs10802708)	0.959	CEU
rs3765799	CHR_HSCHR1_5_CTG32_1:235442157-235442157	T	downstream_gene_variant	MODIFIER	-	-	-	-	TBCE(rs10802708)	0.959	CEU
rs3765799	CHR_HSCHR1_5_CTG32_1:235442157-235442157	A	intron_variant	MODIFIER	-	-	-	-	TBCE(rs10802708)	0.959	CEU
rs3765799	CHR_HSCHR1_5_CTG32_1:235442157-235442157	G	intron_variant	MODIFIER	-	-	-	-	TBCE(rs10802708)	0.959	CEU
rs3765799	CHR_HSCHR1_5_CTG32_1:235442157-235442157	T	intron_variant	MODIFIER	-	-	-	-	TBCE(rs10802708)	0.959	CEU
rs3765799	1:235438366-235438366	A	downstream_gene_variant	MODIFIER	-	-	1.039	-0.052746	TBCE(rs10802708)	0.959	CEU
rs3765799	CHR_HSCHR1_5_CTG32_1:235442157-235442157	G	intron_variant,NMD_transcript_variant	MODIFIER	-	-	-	-	TBCE(rs10802708)	0.959	CEU
rs3765799	CHR_HSCHR1_5_CTG32_1:235442157-235442157	A	intron_variant,NMD_transcript_variant	MODIFIER	-	-	-	-	TBCE(rs10802708)	0.959	CEU
rs3819974	1:235438643-235438643	C	intron_variant	MODIFIER	-	-	0.019	-0.850332	TBCE(rs10802708)	0.898	CEU
rs3819974	1:235438643-235438643	T	intron_variant	MODIFIER	-	-	0.018	-0.86249	TBCE(rs10802708)	0.898	CEU
rs3819974	1:235438643-235438643	C	upstream_gene_variant	MODIFIER	-	-	0.019	-0.850332	TBCE(rs10802708)	0.898	CEU
rs3819974	1:235438643-235438643	T	upstream_gene_variant	MODIFIER	-	-	0.018	-0.86249	TBCE(rs10802708)	0.898	CEU
rs3819974	1:235438643-235438643	C	intron_variant,non_coding_transcript_variant	MODIFIER	-	-	0.019	-0.850332	TBCE(rs10802708)	0.898	CEU
rs3819974	1:235438643-235438643	T	intron_variant,non_coding_transcript_variant	MODIFIER	-	-	0.018	-0.86249	TBCE(rs10802708)	0.898	CEU
rs3819974	1:235438643-235438643	C	downstream_gene_variant	MODIFIER	-	-	0.019	-0.850332	TBCE(rs10802708)	0.898	CEU
rs3819974	1:235438643-235438643	T	downstream_gene_variant	MODIFIER	-	-	0.018	-0.86249	TBCE(rs10802708)	0.898	CEU
rs3819974	1:235438643-235438643	C	intron_variant,NMD_transcript_variant	MODIFIER	-	-	0.019	-0.850332	TBCE(rs10802708)	0.898	CEU
rs3819974	1:235438643-235438643	T	intron_variant,NMD_transcript_variant	MODIFIER	-	-	0.018	-0.86249	TBCE(rs10802708)	0.898	CEU
rs3819974	CHR_HSCHR1_5_CTG32_1:235442434-235442434	T	intron_variant,NMD_transcript_variant	MODIFIER	-	-	-	-	TBCE(rs10802708)	0.898	CEU
rs3819974	CHR_HSCHR1_5_CTG32_1:235442434-235442434	C	intron_variant	MODIFIER	-	-	-	-	TBCE(rs10802708)	0.898	CEU
rs3819974	CHR_HSCHR1_5_CTG32_1:235442434-235442434	T	intron_variant	MODIFIER	-	-	-	-	TBCE(rs10802708)	0.898	CEU
rs3819974	CHR_HSCHR1_5_CTG32_1:235442434-235442434	C	intron_variant,NMD_transcript_variant	MODIFIER	-	-	-	-	TBCE(rs10802708)	0.898	CEU
rs3819974	CHR_HSCHR1_5_CTG32_1:235442434-235442434	C	downstream_gene_variant	MODIFIER	-	-	-	-	TBCE(rs10802708)	0.898	CEU
rs3819974	CHR_HSCHR1_5_CTG32_1:235442434-235442434	T	downstream_gene_variant	MODIFIER	-	-	-	-	TBCE(rs10802708)	0.898	CEU
rs540023393	CHR_HSCHR1_5_CTG32_1:235442343-235442343	TAA	intron_variant,NMD_transcript_variant	MODIFIER	-	-	-	-	TBCE(rs10802708)	0.959	CEU
rs540023393	CHR_HSCHR1_5_CTG32_1:235442343-235442343	TAA	downstream_gene_variant	MODIFIER	-	-	-	-	TBCE(rs10802708)	0.959	CEU
rs540023393	1:235438552-235438552	TAA	intron_variant,NMD_transcript_variant	MODIFIER	-	-	0.951	-0.07135	TBCE(rs10802708)	0.959	CEU
rs540023393	1:235438552-235438552	TAA	intron_variant	MODIFIER	-	-	0.951	-0.07135	TBCE(rs10802708)	0.959	CEU
rs540023393	1:235438552-235438552	TAA	upstream_gene_variant	MODIFIER	-	-	0.951	-0.07135	TBCE(rs10802708)	0.959	CEU
rs540023393	1:235438552-235438552	TAA	intron_variant,non_coding_transcript_variant	MODIFIER	-	-	0.951	-0.07135	TBCE(rs10802708)	0.959	CEU
rs540023393	1:235438552-235438552	TAA	downstream_gene_variant	MODIFIER	-	-	0.951	-0.07135	TBCE(rs10802708)	0.959	CEU
rs540023393	CHR_HSCHR1_5_CTG32_1:235442343-235442343	TAA	intron_variant	MODIFIER	-	-	-	-	TBCE(rs10802708)	0.959	CEU
rs564864054	1:235439336-235439341	AAAAAA	downstream_gene_variant	MODIFIER	-	-	1.666	0.048171	TBCE(rs10802708)	0.619	CEU
rs564864054	1:235439336-235439341	AAAAAAAAAA	downstream_gene_variant	MODIFIER	-	-	1.828	0.068976	TBCE(rs10802708)	0.619	CEU
rs564864054	CHR_HSCHR1_5_CTG32_1:235443127-235443132	AAAAAAAAAAAA	intron_variant,NMD_transcript_variant	MODIFIER	-	-	-	-	TBCE(rs10802708)	0.619	CEU
rs564864054	CHR_HSCHR1_5_CTG32_1:235443127-235443132	AAAAAAAAAAAAA	intron_variant,NMD_transcript_variant	MODIFIER	-	-	-	-	TBCE(rs10802708)	0.619	CEU
rs564864054	CHR_HSCHR1_5_CTG32_1:235443127-235443132	AAAAAAAAAAAAAA	intron_variant,NMD_transcript_variant	MODIFIER	-	-	-	-	TBCE(rs10802708)	0.619	CEU
rs564864054	CHR_HSCHR1_5_CTG32_1:235443127-235443132	AAAAAA	downstream_gene_variant	MODIFIER	-	-	-	-	TBCE(rs10802708)	0.619	CEU
rs564864054	CHR_HSCHR1_5_CTG32_1:235443127-235443132	AAAAAAAAAA	downstream_gene_variant	MODIFIER	-	-	-	-	TBCE(rs10802708)	0.619	CEU
rs564864054	CHR_HSCHR1_5_CTG32_1:235443127-235443132	AAAAAAAAAAAA	downstream_gene_variant	MODIFIER	-	-	-	-	TBCE(rs10802708)	0.619	CEU
rs564864054	CHR_HSCHR1_5_CTG32_1:235443127-235443132	AAAAAAAAAAAAA	downstream_gene_variant	MODIFIER	-	-	-	-	TBCE(rs10802708)	0.619	CEU
rs564864054	CHR_HSCHR1_5_CTG32_1:235443127-235443132	AAAAAAAAAAAAAA	downstream_gene_variant	MODIFIER	-	-	-	-	TBCE(rs10802708)	0.619	CEU
rs564864054	1:235439336-235439341	AAAAAAAAAAAA	downstream_gene_variant	MODIFIER	-	-	2.275	0.119873	TBCE(rs10802708)	0.619	CEU
rs564864054	1:235439336-235439341	AAAAAAAAAAAAA	downstream_gene_variant	MODIFIER	-	-	2.224	0.114464	TBCE(rs10802708)	0.619	CEU
rs564864054	1:235439336-235439341	AAAAAAAAAAAAAA	downstream_gene_variant	MODIFIER	-	-	2.184	0.110197	TBCE(rs10802708)	0.619	CEU
rs564864054	CHR_HSCHR1_5_CTG32_1:235443127-235443132	AAAAAA	intron_variant,NMD_transcript_variant	MODIFIER	-	-	-	-	TBCE(rs10802708)	0.619	CEU
rs564864054	CHR_HSCHR1_5_CTG32_1:235443127-235443132	AAAAAAAAAA	intron_variant,NMD_transcript_variant	MODIFIER	-	-	-	-	TBCE(rs10802708)	0.619	CEU
rs564864054	1:235439336-235439341	AAAAAA	intron_variant	MODIFIER	-	-	1.666	0.048171	TBCE(rs10802708)	0.619	CEU
rs564864054	1:235439336-235439341	AAAAAAAAAA	intron_variant	MODIFIER	-	-	1.828	0.068976	TBCE(rs10802708)	0.619	CEU
rs564864054	1:235439336-235439341	AAAAAAAAAAAA	intron_variant	MODIFIER	-	-	2.275	0.119873	TBCE(rs10802708)	0.619	CEU
rs564864054	1:235439336-235439341	AAAAAAAAAAAAA	intron_variant	MODIFIER	-	-	2.224	0.114464	TBCE(rs10802708)	0.619	CEU
rs564864054	1:235439336-235439341	AAAAAAAAAAAAAA	intron_variant	MODIFIER	-	-	2.184	0.110197	TBCE(rs10802708)	0.619	CEU
rs564864054	1:235439336-235439341	AAAAAA	upstream_gene_variant	MODIFIER	-	-	1.666	0.048171	TBCE(rs10802708)	0.619	CEU
rs564864054	1:235439336-235439341	AAAAAAAAAA	upstream_gene_variant	MODIFIER	-	-	1.828	0.068976	TBCE(rs10802708)	0.619	CEU
rs564864054	1:235439336-235439341	AAAAAAAAAAAA	upstream_gene_variant	MODIFIER	-	-	2.275	0.119873	TBCE(rs10802708)	0.619	CEU
rs564864054	1:235439336-235439341	AAAAAAAAAAAAA	upstream_gene_variant	MODIFIER	-	-	2.224	0.114464	TBCE(rs10802708)	0.619	CEU
rs564864054	1:235439336-235439341	AAAAAAAAAAAAAA	upstream_gene_variant	MODIFIER	-	-	2.184	0.110197	TBCE(rs10802708)	0.619	CEU
rs564864054	1:235439336-235439341	AAAAAA	intron_variant,non_coding_transcript_variant	MODIFIER	-	-	1.666	0.048171	TBCE(rs10802708)	0.619	CEU
rs564864054	1:235439336-235439341	AAAAAAAAAA	intron_variant,non_coding_transcript_variant	MODIFIER	-	-	1.828	0.068976	TBCE(rs10802708)	0.619	CEU
rs564864054	1:235439336-235439341	AAAAAAAAAAAA	intron_variant,non_coding_transcript_variant	MODIFIER	-	-	2.275	0.119873	TBCE(rs10802708)	0.619	CEU
rs564864054	1:235439336-235439341	AAAAAAAAAAAAA	intron_variant,non_coding_transcript_variant	MODIFIER	-	-	2.224	0.114464	TBCE(rs10802708)	0.619	CEU
rs564864054	1:235439336-235439341	AAAAAAAAAAAAAA	intron_variant,non_coding_transcript_variant	MODIFIER	-	-	2.184	0.110197	TBCE(rs10802708)	0.619	CEU
rs564864054	1:235439336-235439341	AAAAAA	intron_variant,NMD_transcript_variant	MODIFIER	-	-	1.666	0.048171	TBCE(rs10802708)	0.619	CEU
rs564864054	1:235439336-235439341	AAAAAAAAAA	intron_variant,NMD_transcript_variant	MODIFIER	-	-	1.828	0.068976	TBCE(rs10802708)	0.619	CEU
rs564864054	1:235439336-235439341	AAAAAAAAAAAA	intron_variant,NMD_transcript_variant	MODIFIER	-	-	2.275	0.119873	TBCE(rs10802708)	0.619	CEU
rs564864054	1:235439336-235439341	AAAAAAAAAAAAA	intron_variant,NMD_transcript_variant	MODIFIER	-	-	2.224	0.114464	TBCE(rs10802708)	0.619	CEU
rs564864054	1:235439336-235439341	AAAAAAAAAAAAAA	intron_variant,NMD_transcript_variant	MODIFIER	-	-	2.184	0.110197	TBCE(rs10802708)	0.619	CEU
rs564864054	CHR_HSCHR1_5_CTG32_1:235443127-235443132	AAAAAA	intron_variant	MODIFIER	-	-	-	-	TBCE(rs10802708)	0.619	CEU
rs564864054	CHR_HSCHR1_5_CTG32_1:235443127-235443132	AAAAAAAAAA	intron_variant	MODIFIER	-	-	-	-	TBCE(rs10802708)	0.619	CEU
rs564864054	CHR_HSCHR1_5_CTG32_1:235443127-235443132	AAAAAAAAAAAA	intron_variant	MODIFIER	-	-	-	-	TBCE(rs10802708)	0.619	CEU
rs564864054	CHR_HSCHR1_5_CTG32_1:235443127-235443132	AAAAAAAAAAAAA	intron_variant	MODIFIER	-	-	-	-	TBCE(rs10802708)	0.619	CEU
rs564864054	CHR_HSCHR1_5_CTG32_1:235443127-235443132	AAAAAAAAAAAAAA	intron_variant	MODIFIER	-	-	-	-	TBCE(rs10802708)	0.619	CEU
rs6429082	1:235436814-235436814	C	intron_variant,non_coding_transcript_variant	MODIFIER	-	-	0.085	-0.56828	TBCE(rs10802708)	0.661	CEU
rs6429082	1:235436814-235436814	C	intron_variant	MODIFIER	-	-	0.085	-0.56828	TBCE(rs10802708)	0.661	CEU
rs6429082	1:235436814-235436814	G	intron_variant	MODIFIER	-	-	0.073	-0.599685	TBCE(rs10802708)	0.661	CEU
rs6429082	1:235436814-235436814	C	downstream_gene_variant	MODIFIER	-	-	0.085	-0.56828	TBCE(rs10802708)	0.661	CEU
rs6429082	1:235436814-235436814	G	downstream_gene_variant	MODIFIER	-	-	0.073	-0.599685	TBCE(rs10802708)	0.661	CEU
rs6429082	1:235436814-235436814	C	upstream_gene_variant	MODIFIER	-	-	0.085	-0.56828	TBCE(rs10802708)	0.661	CEU
rs6429082	1:235436814-235436814	G	upstream_gene_variant	MODIFIER	-	-	0.073	-0.599685	TBCE(rs10802708)	0.661	CEU
rs6429082	1:235436814-235436814	G	intron_variant,non_coding_transcript_variant	MODIFIER	-	-	0.073	-0.599685	TBCE(rs10802708)	0.661	CEU
rs6429082	1:235436814-235436814	C	intron_variant,NMD_transcript_variant	MODIFIER	-	-	0.085	-0.56828	TBCE(rs10802708)	0.661	CEU
rs6429082	1:235436814-235436814	G	intron_variant,NMD_transcript_variant	MODIFIER	-	-	0.073	-0.599685	TBCE(rs10802708)	0.661	CEU
rs6429082	CHR_HSCHR1_5_CTG32_1:235440605-235440605	C	intron_variant,NMD_transcript_variant	MODIFIER	-	-	-	-	TBCE(rs10802708)	0.661	CEU
rs6429082	CHR_HSCHR1_5_CTG32_1:235440605-235440605	G	intron_variant,NMD_transcript_variant	MODIFIER	-	-	-	-	TBCE(rs10802708)	0.661	CEU
rs6429082	CHR_HSCHR1_5_CTG32_1:235440605-235440605	C	downstream_gene_variant	MODIFIER	-	-	-	-	TBCE(rs10802708)	0.661	CEU
rs6429082	CHR_HSCHR1_5_CTG32_1:235440605-235440605	G	downstream_gene_variant	MODIFIER	-	-	-	-	TBCE(rs10802708)	0.661	CEU
rs6429082	CHR_HSCHR1_5_CTG32_1:235440605-235440605	C	intron_variant	MODIFIER	-	-	-	-	TBCE(rs10802708)	0.661	CEU
rs6429082	CHR_HSCHR1_5_CTG32_1:235440605-235440605	G	intron_variant	MODIFIER	-	-	-	-	TBCE(rs10802708)	0.661	CEU
rs6429089	1:235440026-235440026	G	intron_variant	MODIFIER	-	-	2.9	0.180148	TBCE(rs10802708)	0.676	CEU
rs6429089	1:235440026-235440026	T	intron_variant	MODIFIER	-	-	2.443	0.136995	TBCE(rs10802708)	0.676	CEU
rs6429089	1:235440026-235440026	G	upstream_gene_variant	MODIFIER	-	-	2.9	0.180148	TBCE(rs10802708)	0.676	CEU
rs6429089	1:235440026-235440026	T	upstream_gene_variant	MODIFIER	-	-	2.443	0.136995	TBCE(rs10802708)	0.676	CEU
rs6429089	1:235440026-235440026	G	intron_variant,non_coding_transcript_variant	MODIFIER	-	-	2.9	0.180148	TBCE(rs10802708)	0.676	CEU
rs6429089	1:235440026-235440026	T	intron_variant,non_coding_transcript_variant	MODIFIER	-	-	2.443	0.136995	TBCE(rs10802708)	0.676	CEU
rs6429089	1:235440026-235440026	G	intron_variant,NMD_transcript_variant	MODIFIER	-	-	2.9	0.180148	TBCE(rs10802708)	0.676	CEU
rs6429089	1:235440026-235440026	T	intron_variant,NMD_transcript_variant	MODIFIER	-	-	2.443	0.136995	TBCE(rs10802708)	0.676	CEU
rs6429089	1:235440026-235440026	G	downstream_gene_variant	MODIFIER	-	-	2.9	0.180148	TBCE(rs10802708)	0.676	CEU
rs6429089	1:235440026-235440026	T	downstream_gene_variant	MODIFIER	-	-	2.443	0.136995	TBCE(rs10802708)	0.676	CEU
rs6429089	CHR_HSCHR1_5_CTG32_1:235443817-235443817	G	intron_variant	MODIFIER	-	-	-	-	TBCE(rs10802708)	0.676	CEU
rs6429089	CHR_HSCHR1_5_CTG32_1:235443817-235443817	T	intron_variant	MODIFIER	-	-	-	-	TBCE(rs10802708)	0.676	CEU
rs6429089	CHR_HSCHR1_5_CTG32_1:235443817-235443817	G	intron_variant,NMD_transcript_variant	MODIFIER	-	-	-	-	TBCE(rs10802708)	0.676	CEU
rs6429089	CHR_HSCHR1_5_CTG32_1:235443817-235443817	T	intron_variant,NMD_transcript_variant	MODIFIER	-	-	-	-	TBCE(rs10802708)	0.676	CEU
rs6429089	CHR_HSCHR1_5_CTG32_1:235443817-235443817	G	downstream_gene_variant	MODIFIER	-	-	-	-	TBCE(rs10802708)	0.676	CEU
rs6429089	CHR_HSCHR1_5_CTG32_1:235443817-235443817	T	downstream_gene_variant	MODIFIER	-	-	-	-	TBCE(rs10802708)	0.676	CEU
rs6658187	1:235436893-235436893	T	intron_variant	MODIFIER	-	-	2.9	0.180159	TBCE(rs10802708)	0.619	CEU
rs6658187	1:235436893-235436893	A	downstream_gene_variant	MODIFIER	-	-	2.282	0.120634	TBCE(rs10802708)	0.619	CEU
rs6658187	1:235436893-235436893	G	downstream_gene_variant	MODIFIER	-	-	2.452	0.137886	TBCE(rs10802708)	0.619	CEU
rs6658187	1:235436893-235436893	T	downstream_gene_variant	MODIFIER	-	-	2.9	0.180159	TBCE(rs10802708)	0.619	CEU
rs6658187	1:235436893-235436893	A	upstream_gene_variant	MODIFIER	-	-	2.282	0.120634	TBCE(rs10802708)	0.619	CEU
rs6658187	1:235436893-235436893	G	upstream_gene_variant	MODIFIER	-	-	2.452	0.137886	TBCE(rs10802708)	0.619	CEU
rs6658187	1:235436893-235436893	T	upstream_gene_variant	MODIFIER	-	-	2.9	0.180159	TBCE(rs10802708)	0.619	CEU
rs6658187	1:235436893-235436893	A	intron_variant,non_coding_transcript_variant	MODIFIER	-	-	2.282	0.120634	TBCE(rs10802708)	0.619	CEU
rs6658187	1:235436893-235436893	A	intron_variant	MODIFIER	-	-	2.282	0.120634	TBCE(rs10802708)	0.619	CEU
rs6658187	1:235436893-235436893	G	intron_variant	MODIFIER	-	-	2.452	0.137886	TBCE(rs10802708)	0.619	CEU
rs6658187	CHR_HSCHR1_5_CTG32_1:235440684-235440684	A	downstream_gene_variant	MODIFIER	-	-	-	-	TBCE(rs10802708)	0.619	CEU
rs6658187	CHR_HSCHR1_5_CTG32_1:235440684-235440684	G	downstream_gene_variant	MODIFIER	-	-	-	-	TBCE(rs10802708)	0.619	CEU
rs6658187	CHR_HSCHR1_5_CTG32_1:235440684-235440684	T	downstream_gene_variant	MODIFIER	-	-	-	-	TBCE(rs10802708)	0.619	CEU
rs6658187	CHR_HSCHR1_5_CTG32_1:235440684-235440684	A	intron_variant	MODIFIER	-	-	-	-	TBCE(rs10802708)	0.619	CEU
rs6658187	CHR_HSCHR1_5_CTG32_1:235440684-235440684	G	intron_variant	MODIFIER	-	-	-	-	TBCE(rs10802708)	0.619	CEU
rs6658187	CHR_HSCHR1_5_CTG32_1:235440684-235440684	T	intron_variant	MODIFIER	-	-	-	-	TBCE(rs10802708)	0.619	CEU
rs6658187	CHR_HSCHR1_5_CTG32_1:235440684-235440684	A	intron_variant,NMD_transcript_variant	MODIFIER	-	-	-	-	TBCE(rs10802708)	0.619	CEU
rs6658187	CHR_HSCHR1_5_CTG32_1:235440684-235440684	G	intron_variant,NMD_transcript_variant	MODIFIER	-	-	-	-	TBCE(rs10802708)	0.619	CEU
rs6658187	1:235436893-235436893	G	intron_variant,non_coding_transcript_variant	MODIFIER	-	-	2.452	0.137886	TBCE(rs10802708)	0.619	CEU
rs6658187	1:235436893-235436893	T	intron_variant,non_coding_transcript_variant	MODIFIER	-	-	2.9	0.180159	TBCE(rs10802708)	0.619	CEU
rs6658187	1:235436893-235436893	A	intron_variant,NMD_transcript_variant	MODIFIER	-	-	2.282	0.120634	TBCE(rs10802708)	0.619	CEU
rs6658187	1:235436893-235436893	G	intron_variant,NMD_transcript_variant	MODIFIER	-	-	2.452	0.137886	TBCE(rs10802708)	0.619	CEU
rs6658187	1:235436893-235436893	T	intron_variant,NMD_transcript_variant	MODIFIER	-	-	2.9	0.180159	TBCE(rs10802708)	0.619	CEU
rs6658187	CHR_HSCHR1_5_CTG32_1:235440684-235440684	T	intron_variant,NMD_transcript_variant	MODIFIER	-	-	-	-	TBCE(rs10802708)	0.619	CEU
rs9793740	1:235432275-235432275	A	intron_variant	MODIFIER	-	-	0.651	-0.150524	TBCE(rs10802708)	1	CEU
rs9793740	1:235432275-235432275	C	intron_variant	MODIFIER	-	-	0.821	-0.102111	TBCE(rs10802708)	1	CEU
rs9793740	1:235432275-235432275	A	upstream_gene_variant	MODIFIER	-	-	0.651	-0.150524	TBCE(rs10802708)	1	CEU
rs9793740	1:235432275-235432275	C	upstream_gene_variant	MODIFIER	-	-	0.821	-0.102111	TBCE(rs10802708)	1	CEU
rs9793740	1:235432275-235432275	A	intron_variant,non_coding_transcript_variant	MODIFIER	-	-	0.651	-0.150524	TBCE(rs10802708)	1	CEU
rs9793740	1:235432275-235432275	C	intron_variant,non_coding_transcript_variant	MODIFIER	-	-	0.821	-0.102111	TBCE(rs10802708)	1	CEU
rs9793740	1:235432275-235432275	A	intron_variant,NMD_transcript_variant	MODIFIER	-	-	0.651	-0.150524	TBCE(rs10802708)	1	CEU
rs9793740	1:235432275-235432275	C	intron_variant,NMD_transcript_variant	MODIFIER	-	-	0.821	-0.102111	TBCE(rs10802708)	1	CEU
rs9793740	1:235432275-235432275	A	downstream_gene_variant	MODIFIER	-	-	0.651	-0.150524	TBCE(rs10802708)	1	CEU
rs9793740	1:235432275-235432275	C	downstream_gene_variant	MODIFIER	-	-	0.821	-0.102111	TBCE(rs10802708)	1	CEU
rs9793740	CHR_HSCHR1_5_CTG32_1:235436066-235436066	C	intron_variant	MODIFIER	-	-	-	-	TBCE(rs10802708)	1	CEU
rs9793740	CHR_HSCHR1_5_CTG32_1:235436066-235436066	A	upstream_gene_variant	MODIFIER	-	-	-	-	TBCE(rs10802708)	1	CEU
rs9793740	CHR_HSCHR1_5_CTG32_1:235436066-235436066	C	upstream_gene_variant	MODIFIER	-	-	-	-	TBCE(rs10802708)	1	CEU
rs9793740	CHR_HSCHR1_5_CTG32_1:235436066-235436066	A	intron_variant	MODIFIER	-	-	-	-	TBCE(rs10802708)	1	CEU
rs9793740	CHR_HSCHR1_5_CTG32_1:235436066-235436066	C	downstream_gene_variant	MODIFIER	-	-	-	-	TBCE(rs10802708)	1	CEU
rs9793740	CHR_HSCHR1_5_CTG32_1:235436066-235436066	A	intron_variant,NMD_transcript_variant	MODIFIER	-	-	-	-	TBCE(rs10802708)	1	CEU
rs9793740	CHR_HSCHR1_5_CTG32_1:235436066-235436066	C	intron_variant,NMD_transcript_variant	MODIFIER	-	-	-	-	TBCE(rs10802708)	1	CEU
rs9793740	CHR_HSCHR1_5_CTG32_1:235436066-235436066	A	downstream_gene_variant	MODIFIER	-	-	-	-	TBCE(rs10802708)	1	CEU
rs12053646	20:63748395-63748395	A	intron_variant	MODIFIER	-	-	0.946	-0.072367	TNFRSF6B(rs1056441)_x000D_	0.381	CEU
rs12053646	20:63748395-63748395	C	intron_variant	MODIFIER	-	-	0.794	-0.109062	TNFRSF6B(rs1056441)_x000D_	0.381	CEU
rs12053646	20:63748395-63748395	A	downstream_gene_variant	MODIFIER	-	-	0.946	-0.072367	TNFRSF6B(rs1056441)_x000D_	0.381	CEU
rs12053646	20:63748395-63748395	C	downstream_gene_variant	MODIFIER	-	-	0.794	-0.109062	TNFRSF6B(rs1056441)_x000D_	0.381	CEU
rs12053646	20:63748395-63748395	A	intron_variant,non_coding_transcript_variant	MODIFIER	-	-	0.946	-0.072367	TNFRSF6B(rs1056441)_x000D_	0.381	CEU
rs12053646	20:63748395-63748395	C	intron_variant,non_coding_transcript_variant	MODIFIER	-	-	0.794	-0.109062	TNFRSF6B(rs1056441)_x000D_	0.381	CEU
rs12053646	20:63748395-63748395	A	regulatory_region_variant	MODIFIER	-	-	0.946	-0.072367	TNFRSF6B(rs1056441)_x000D_	0.381	CEU
rs12053646	20:63748395-63748395	C	regulatory_region_variant	MODIFIER	-	-	0.794	-0.109062	TNFRSF6B(rs1056441)_x000D_	0.381	CEU
rs1741708	20:63740688-63740688	T	downstream_gene_variant	MODIFIER	-	-	7.947	0.645405	TNFRSF6B(rs1056441)_x000D_	0.585	CEU
rs1741708	20:63740688-63740688	T	intron_variant	MODIFIER	-	-	7.947	0.645405	TNFRSF6B(rs1056441)_x000D_	0.585	CEU
rs1741708	20:63740688-63740688	T	upstream_gene_variant	MODIFIER	-	-	7.947	0.645405	TNFRSF6B(rs1056441)_x000D_	0.585	CEU
rs1741708	20:63740688-63740688	T	intron_variant,non_coding_transcript_variant	MODIFIER	-	-	7.947	0.645405	TNFRSF6B(rs1056441)_x000D_	0.585	CEU
rs1741708	20:63740688-63740688	T	regulatory_region_variant	MODIFIER	-	-	7.947	0.645405	TNFRSF6B(rs1056441)_x000D_	0.585	CEU
rs1887406	20:63748637-63748637	A	intron_variant	MODIFIER	-	-	0.235	-0.358193	TNFRSF6B(rs1056441)_x000D_	0.396	CEU
rs1887406	20:63748637-63748637	C	intron_variant	MODIFIER	-	-	0.197	-0.394888	TNFRSF6B(rs1056441)_x000D_	0.396	CEU
rs1887406	20:63748637-63748637	T	intron_variant	MODIFIER	-	-	0.185	-0.407397	TNFRSF6B(rs1056441)_x000D_	0.396	CEU
rs1887406	20:63748637-63748637	A	downstream_gene_variant	MODIFIER	-	-	0.235	-0.358193	TNFRSF6B(rs1056441)_x000D_	0.396	CEU
rs1887406	20:63748637-63748637	C	downstream_gene_variant	MODIFIER	-	-	0.197	-0.394888	TNFRSF6B(rs1056441)_x000D_	0.396	CEU
rs1887406	20:63748637-63748637	T	downstream_gene_variant	MODIFIER	-	-	0.185	-0.407397	TNFRSF6B(rs1056441)_x000D_	0.396	CEU
rs1887406	20:63748637-63748637	A	intron_variant,non_coding_transcript_variant	MODIFIER	-	-	0.235	-0.358193	TNFRSF6B(rs1056441)_x000D_	0.396	CEU
rs1887406	20:63748637-63748637	C	intron_variant,non_coding_transcript_variant	MODIFIER	-	-	0.197	-0.394888	TNFRSF6B(rs1056441)_x000D_	0.396	CEU
rs1887406	20:63748637-63748637	T	intron_variant,non_coding_transcript_variant	MODIFIER	-	-	0.185	-0.407397	TNFRSF6B(rs1056441)_x000D_	0.396	CEU
rs1887406	20:63748637-63748637	A	regulatory_region_variant	MODIFIER	-	-	0.235	-0.358193	TNFRSF6B(rs1056441)_x000D_	0.396	CEU
rs1887406	20:63748637-63748637	C	regulatory_region_variant	MODIFIER	-	-	0.197	-0.394888	TNFRSF6B(rs1056441)_x000D_	0.396	CEU
rs1887406	20:63748637-63748637	T	regulatory_region_variant	MODIFIER	-	-	0.185	-0.407397	TNFRSF6B(rs1056441)_x000D_	0.396	CEU
rs2253823	20:63741603-63741603	T	downstream_gene_variant	MODIFIER	-	-	0.121	-0.496272	TNFRSF6B(rs1056441)_x000D_	0.585	CEU
rs2253823	20:63741603-63741603	T	intron_variant	MODIFIER	-	-	0.121	-0.496272	TNFRSF6B(rs1056441)_x000D_	0.585	CEU
rs2253823	20:63741603-63741603	T	upstream_gene_variant	MODIFIER	-	-	0.121	-0.496272	TNFRSF6B(rs1056441)_x000D_	0.585	CEU
rs2253823	20:63741603-63741603	T	intron_variant,non_coding_transcript_variant	MODIFIER	-	-	0.121	-0.496272	TNFRSF6B(rs1056441)_x000D_	0.585	CEU
rs2253823	20:63741603-63741603	T	regulatory_region_variant	MODIFIER	-	-	0.121	-0.496272	TNFRSF6B(rs1056441)_x000D_	0.585	CEU
rs2253829	20:63741726-63741726	A	downstream_gene_variant	MODIFIER	-	-	0.692	-0.138021	TNFRSF6B(rs1056441)_x000D_	0.585	CEU
rs2253829	20:63741726-63741726	C	downstream_gene_variant	MODIFIER	-	-	0.579	-0.174716	TNFRSF6B(rs1056441)_x000D_	0.585	CEU
rs2253829	20:63741726-63741726	T	downstream_gene_variant	MODIFIER	-	-	0.545	-0.186875	TNFRSF6B(rs1056441)_x000D_	0.585	CEU
rs2253829	20:63741726-63741726	A	intron_variant	MODIFIER	-	-	0.692	-0.138021	TNFRSF6B(rs1056441)_x000D_	0.585	CEU
rs2253829	20:63741726-63741726	C	intron_variant	MODIFIER	-	-	0.579	-0.174716	TNFRSF6B(rs1056441)_x000D_	0.585	CEU
rs2253829	20:63741726-63741726	T	intron_variant	MODIFIER	-	-	0.545	-0.186875	TNFRSF6B(rs1056441)_x000D_	0.585	CEU
rs2253829	20:63741726-63741726	A	upstream_gene_variant	MODIFIER	-	-	0.692	-0.138021	TNFRSF6B(rs1056441)_x000D_	0.585	CEU
rs2253829	20:63741726-63741726	C	upstream_gene_variant	MODIFIER	-	-	0.579	-0.174716	TNFRSF6B(rs1056441)_x000D_	0.585	CEU
rs2253829	20:63741726-63741726	T	upstream_gene_variant	MODIFIER	-	-	0.545	-0.186875	TNFRSF6B(rs1056441)_x000D_	0.585	CEU
rs2253829	20:63741726-63741726	A	intron_variant,non_coding_transcript_variant	MODIFIER	-	-	0.692	-0.138021	TNFRSF6B(rs1056441)_x000D_	0.585	CEU
rs2253829	20:63741726-63741726	C	intron_variant,non_coding_transcript_variant	MODIFIER	-	-	0.579	-0.174716	TNFRSF6B(rs1056441)_x000D_	0.585	CEU
rs2253829	20:63741726-63741726	T	intron_variant,non_coding_transcript_variant	MODIFIER	-	-	0.545	-0.186875	TNFRSF6B(rs1056441)_x000D_	0.585	CEU
rs2253829	20:63741726-63741726	A	regulatory_region_variant	MODIFIER	-	-	0.692	-0.138021	TNFRSF6B(rs1056441)_x000D_	0.585	CEU
rs2253829	20:63741726-63741726	C	regulatory_region_variant	MODIFIER	-	-	0.579	-0.174716	TNFRSF6B(rs1056441)_x000D_	0.585	CEU
rs2253829	20:63741726-63741726	T	regulatory_region_variant	MODIFIER	-	-	0.545	-0.186875	TNFRSF6B(rs1056441)_x000D_	0.585	CEU
rs2256814	20:63742630-63742630	A	downstream_gene_variant	MODIFIER	-	-	0.069	-0.61015	TNFRSF6B(rs1056441)_x000D_	0.424	CEU
rs2256814	20:63742630-63742630	A	intron_variant	MODIFIER	-	-	0.069	-0.61015	TNFRSF6B(rs1056441)_x000D_	0.424	CEU
rs2256814	20:63742630-63742630	A	upstream_gene_variant	MODIFIER	-	-	0.069	-0.61015	TNFRSF6B(rs1056441)_x000D_	0.424	CEU
rs2256814	20:63742630-63742630	A	intron_variant,non_coding_transcript_variant	MODIFIER	-	-	0.069	-0.61015	TNFRSF6B(rs1056441)_x000D_	0.424	CEU
rs2256814	20:63742630-63742630	A	non_coding_transcript_exon_variant	MODIFIER	-	-	0.069	-0.61015	TNFRSF6B(rs1056441)_x000D_	0.424	CEU
rs2296763	20:63745586-63745586	C	3_prime_UTR_variant	MODIFIER	-	-	3.283	0.213895	TNFRSF6B(rs1056441)_x000D_	0.71	CEU
rs2296763	20:63745586-63745586	C	downstream_gene_variant	MODIFIER	-	-	3.283	0.213895	TNFRSF6B(rs1056441)_x000D_	0.71	CEU
rs2296763	20:63745586-63745586	C	intron_variant	MODIFIER	-	-	3.283	0.213895	TNFRSF6B(rs1056441)_x000D_	0.71	CEU
rs2296763	20:63745586-63745586	C	non_coding_transcript_exon_variant	MODIFIER	-	-	3.283	0.213895	TNFRSF6B(rs1056441)_x000D_	0.71	CEU
rs2296763	20:63745586-63745586	C	intron_variant,non_coding_transcript_variant	MODIFIER	-	-	3.283	0.213895	TNFRSF6B(rs1056441)_x000D_	0.71	CEU
rs4809221	20:63741353-63741353	A	downstream_gene_variant	MODIFIER	-	-	4.342	0.304528	TNFRSF6B(rs1056441)_x000D_	1	CEU
rs4809221	20:63741353-63741353	C	downstream_gene_variant	MODIFIER	-	-	3.902	0.266886	TNFRSF6B(rs1056441)_x000D_	1	CEU
rs4809221	20:63741353-63741353	T	downstream_gene_variant	MODIFIER	-	-	3.753	0.254125	TNFRSF6B(rs1056441)_x000D_	1	CEU
rs4809221	20:63741353-63741353	A	intron_variant	MODIFIER	-	-	4.342	0.304528	TNFRSF6B(rs1056441)_x000D_	1	CEU
rs4809221	20:63741353-63741353	C	intron_variant	MODIFIER	-	-	3.902	0.266886	TNFRSF6B(rs1056441)_x000D_	1	CEU
rs4809221	20:63741353-63741353	T	intron_variant	MODIFIER	-	-	3.753	0.254125	TNFRSF6B(rs1056441)_x000D_	1	CEU
rs4809221	20:63741353-63741353	A	upstream_gene_variant	MODIFIER	-	-	4.342	0.304528	TNFRSF6B(rs1056441)_x000D_	1	CEU
rs4809221	20:63741353-63741353	C	upstream_gene_variant	MODIFIER	-	-	3.902	0.266886	TNFRSF6B(rs1056441)_x000D_	1	CEU
rs4809221	20:63741353-63741353	T	upstream_gene_variant	MODIFIER	-	-	3.753	0.254125	TNFRSF6B(rs1056441)_x000D_	1	CEU
rs4809221	20:63741353-63741353	A	intron_variant,non_coding_transcript_variant	MODIFIER	-	-	4.342	0.304528	TNFRSF6B(rs1056441)_x000D_	1	CEU
rs4809221	20:63741353-63741353	C	intron_variant,non_coding_transcript_variant	MODIFIER	-	-	3.902	0.266886	TNFRSF6B(rs1056441)_x000D_	1	CEU
rs4809221	20:63741353-63741353	T	intron_variant,non_coding_transcript_variant	MODIFIER	-	-	3.753	0.254125	TNFRSF6B(rs1056441)_x000D_	1	CEU
rs4809221	20:63741353-63741353	A	non_coding_transcript_exon_variant	MODIFIER	-	-	4.342	0.304528	TNFRSF6B(rs1056441)_x000D_	1	CEU
rs4809221	20:63741353-63741353	C	non_coding_transcript_exon_variant	MODIFIER	-	-	3.902	0.266886	TNFRSF6B(rs1056441)_x000D_	1	CEU
rs4809221	20:63741353-63741353	T	non_coding_transcript_exon_variant	MODIFIER	-	-	3.753	0.254125	TNFRSF6B(rs1056441)_x000D_	1	CEU
rs4809221	20:63741353-63741353	A	regulatory_region_variant	MODIFIER	-	-	4.342	0.304528	TNFRSF6B(rs1056441)_x000D_	1	CEU
rs4809221	20:63741353-63741353	C	regulatory_region_variant	MODIFIER	-	-	3.902	0.266886	TNFRSF6B(rs1056441)_x000D_	1	CEU
rs4809221	20:63741353-63741353	T	regulatory_region_variant	MODIFIER	-	-	3.753	0.254125	TNFRSF6B(rs1056441)_x000D_	1	CEU
rs4809221	20:63741353-63741353	A	TF_binding_site_variant	MODIFIER	-	-	4.342	0.304528	TNFRSF6B(rs1056441)_x000D_	1	CEU
rs4809221	20:63741353-63741353	C	TF_binding_site_variant	MODIFIER	-	-	3.902	0.266886	TNFRSF6B(rs1056441)_x000D_	1	CEU
rs4809221	20:63741353-63741353	T	TF_binding_site_variant	MODIFIER	-	-	3.753	0.254125	TNFRSF6B(rs1056441)_x000D_	1	CEU
rs6062510	20:63740795-63740795	A	downstream_gene_variant	MODIFIER	-	-	5.636	0.418951	TNFRSF6B(rs1056441)_x000D_	1	CEU
rs6062510	20:63740795-63740795	C	downstream_gene_variant	MODIFIER	-	-	5.225	0.381923	TNFRSF6B(rs1056441)_x000D_	1	CEU
rs6062510	20:63740795-63740795	A	intron_variant	MODIFIER	-	-	5.636	0.418951	TNFRSF6B(rs1056441)_x000D_	1	CEU
rs6062510	20:63740795-63740795	C	intron_variant	MODIFIER	-	-	5.225	0.381923	TNFRSF6B(rs1056441)_x000D_	1	CEU
rs6062510	20:63740795-63740795	A	upstream_gene_variant	MODIFIER	-	-	5.636	0.418951	TNFRSF6B(rs1056441)_x000D_	1	CEU
rs6062510	20:63740795-63740795	C	upstream_gene_variant	MODIFIER	-	-	5.225	0.381923	TNFRSF6B(rs1056441)_x000D_	1	CEU
rs6062510	20:63740795-63740795	A	intron_variant,non_coding_transcript_variant	MODIFIER	-	-	5.636	0.418951	TNFRSF6B(rs1056441)_x000D_	1	CEU
rs6062510	20:63740795-63740795	C	intron_variant,non_coding_transcript_variant	MODIFIER	-	-	5.225	0.381923	TNFRSF6B(rs1056441)_x000D_	1	CEU
rs6062510	20:63740795-63740795	A	regulatory_region_variant	MODIFIER	-	-	5.636	0.418951	TNFRSF6B(rs1056441)_x000D_	1	CEU
rs6062510	20:63740795-63740795	C	regulatory_region_variant	MODIFIER	-	-	5.225	0.381923	TNFRSF6B(rs1056441)_x000D_	1	CEU
rs6062510	20:63740795-63740795	A	TF_binding_site_variant	MODIFIER	-	-	5.636	0.418951	TNFRSF6B(rs1056441)_x000D_	1	CEU
rs6062510	20:63740795-63740795	C	TF_binding_site_variant	MODIFIER	-	-	5.225	0.381923	TNFRSF6B(rs1056441)_x000D_	1	CEU
rs6122159	20:63739379-63739379	T	downstream_gene_variant	MODIFIER	-	-	7.378	0.586156	TNFRSF6B(rs1056441)_x000D_	0.585	CEU
rs6122159	20:63739379-63739379	T	upstream_gene_variant	MODIFIER	-	-	7.378	0.586156	TNFRSF6B(rs1056441)_x000D_	0.585	CEU
rs6122159	20:63739379-63739379	T	intron_variant	MODIFIER	-	-	7.378	0.586156	TNFRSF6B(rs1056441)_x000D_	0.585	CEU
rs6122159	20:63739379-63739379	T	intron_variant,non_coding_transcript_variant	MODIFIER	-	-	7.378	0.586156	TNFRSF6B(rs1056441)_x000D_	0.585	CEU
rs6122159	20:63739379-63739379	T	regulatory_region_variant	MODIFIER	-	-	7.378	0.586156	TNFRSF6B(rs1056441)_x000D_	0.585	CEU
rs73622886	20:63747601-63747601	G	intron_variant	MODIFIER	-	-	0.364	-0.268238	TNFRSF6B(rs1056441)_x000D_	0.424	CEU
rs73622886	20:63747601-63747601	T	intron_variant	MODIFIER	-	-	0.449	-0.225966	TNFRSF6B(rs1056441)_x000D_	0.424	CEU
rs73622886	20:63747601-63747601	G	downstream_gene_variant	MODIFIER	-	-	0.364	-0.268238	TNFRSF6B(rs1056441)_x000D_	0.424	CEU
rs73622886	20:63747601-63747601	T	downstream_gene_variant	MODIFIER	-	-	0.449	-0.225966	TNFRSF6B(rs1056441)_x000D_	0.424	CEU
rs73622886	20:63747601-63747601	G	intron_variant,non_coding_transcript_variant	MODIFIER	-	-	0.364	-0.268238	TNFRSF6B(rs1056441)_x000D_	0.424	CEU
rs73622886	20:63747601-63747601	T	intron_variant,non_coding_transcript_variant	MODIFIER	-	-	0.449	-0.225966	TNFRSF6B(rs1056441)_x000D_	0.424	CEU
rs73622886	20:63747601-63747601	G	regulatory_region_variant	MODIFIER	-	-	0.364	-0.268238	TNFRSF6B(rs1056441)_x000D_	0.424	CEU
rs73622886	20:63747601-63747601	T	regulatory_region_variant	MODIFIER	-	-	0.449	-0.225966	TNFRSF6B(rs1056441)_x000D_	0.424	CEU
rs73622887	20:63747986-63747986	G	intron_variant	MODIFIER	-	-	2.127	0.103968	TNFRSF6B(rs1056441)_x000D_	0.381	CEU
rs73622887	20:63747986-63747986	T	intron_variant	MODIFIER	-	-	2.537	0.14624	TNFRSF6B(rs1056441)_x000D_	0.381	CEU
rs73622887	20:63747986-63747986	G	downstream_gene_variant	MODIFIER	-	-	2.127	0.103968	TNFRSF6B(rs1056441)_x000D_	0.381	CEU
rs73622887	20:63747986-63747986	T	downstream_gene_variant	MODIFIER	-	-	2.537	0.14624	TNFRSF6B(rs1056441)_x000D_	0.381	CEU
rs73622887	20:63747986-63747986	G	intron_variant,non_coding_transcript_variant	MODIFIER	-	-	2.127	0.103968	TNFRSF6B(rs1056441)_x000D_	0.381	CEU
rs73622887	20:63747986-63747986	T	intron_variant,non_coding_transcript_variant	MODIFIER	-	-	2.537	0.14624	TNFRSF6B(rs1056441)_x000D_	0.381	CEU
rs73622887	20:63747986-63747986	G	regulatory_region_variant	MODIFIER	-	-	2.127	0.103968	TNFRSF6B(rs1056441)_x000D_	0.381	CEU
rs73622887	20:63747986-63747986	T	regulatory_region_variant	MODIFIER	-	-	2.537	0.14624	TNFRSF6B(rs1056441)_x000D_	0.381	CEU
rs73625081	20:63748092-63748092	CT	intron_variant	MODIFIER	-	-	3.305	0.215806	TNFRSF6B(rs1056441)_x000D_	0.381	CEU
rs73625081	20:63748092-63748092	T	intron_variant	MODIFIER	-	-	-	-	TNFRSF6B(rs1056441)_x000D_	0.381	CEU
rs73625081	20:63748092-63748092	CT	downstream_gene_variant	MODIFIER	-	-	3.305	0.215806	TNFRSF6B(rs1056441)_x000D_	0.381	CEU
rs73625081	20:63748092-63748092	T	downstream_gene_variant	MODIFIER	-	-	-	-	TNFRSF6B(rs1056441)_x000D_	0.381	CEU
rs73625081	20:63748092-63748092	CT	intron_variant,non_coding_transcript_variant	MODIFIER	-	-	3.305	0.215806	TNFRSF6B(rs1056441)_x000D_	0.381	CEU
rs73625081	20:63748092-63748092	T	intron_variant,non_coding_transcript_variant	MODIFIER	-	-	-	-	TNFRSF6B(rs1056441)_x000D_	0.381	CEU
rs73625081	20:63748092-63748092	CT	regulatory_region_variant	MODIFIER	-	-	3.305	0.215806	TNFRSF6B(rs1056441)_x000D_	0.381	CEU
rs73625081	20:63748092-63748092	T	regulatory_region_variant	MODIFIER	-	-	-	-	TNFRSF6B(rs1056441)_x000D_	0.381	CEU
rs8957	20:63742354-63742354	T	downstream_gene_variant	MODIFIER	-	-	17.1	1.71099	TNFRSF6B(rs1056441)_x000D_	0.807	CEU
rs8957	20:63742354-63742354	T	missense_variant	MODERATE	tolerated(1)	benign(0.007)	17.1	1.71099	TNFRSF6B(rs1056441)_x000D_	0.807	CEU
rs8957	20:63742354-63742354	T	upstream_gene_variant	MODIFIER	-	-	17.1	1.71099	TNFRSF6B(rs1056441)_x000D_	0.807	CEU
rs8957	20:63742354-63742354	T	non_coding_transcript_exon_variant	MODIFIER	-	-	17.1	1.71099	TNFRSF6B(rs1056441)_x000D_	0.807	CEU
rs62644435	5:87287160-87287160	A	intron_variant	MODIFIER	-	-	0.276	-0.32517	CCNH (rs7719891)	0.39	CEU
rs62644435	5:87287160-87287160	C	intron_variant	MODIFIER	-	-	0.349	-0.276757	CCNH (rs7719891)	0.39	CEU
rs62644435	5:87287160-87287160	A	intron_variant,NMD_transcript_variant	MODIFIER	-	-	0.276	-0.32517	CCNH (rs7719891)	0.39	CEU
rs62644435	5:87287160-87287160	C	intron_variant,NMD_transcript_variant	MODIFIER	-	-	0.349	-0.276757	CCNH (rs7719891)	0.39	CEU
rs77964267	5:87287947-87287947	C	intron_variant	MODIFIER	-	-	2.849	0.175499	CCNH (rs7719891)	0.335	CEU
rs77964267	5:87287947-87287947	T	intron_variant	MODIFIER	-	-	2.702	0.162013	CCNH (rs7719891)	0.335	CEU
rs77964267	5:87287947-87287947	C	intron_variant,NMD_transcript_variant	MODIFIER	-	-	2.849	0.175499	CCNH (rs7719891)	0.335	CEU
rs77964267	5:87287947-87287947	T	intron_variant,NMD_transcript_variant	MODIFIER	-	-	2.702	0.162013	CCNH (rs7719891)	0.335	CEU
rs388340	5:87289003-87289003	A	intron_variant	MODIFIER	-	-	0.137	-0.470601	CCNH (rs7719891)	0.354	CEU
rs388340	5:87289003-87289003	A	intron_variant,NMD_transcript_variant	MODIFIER	-	-	0.137	-0.470601	CCNH (rs7719891)	0.354	CEU
rs2246012	6:131577068-131577068	A	intron_variant,non_coding_transcript_variant	MODIFIER	-	-	0.134	-0.474294	ARG1 (rs2781668)	1	CEU
rs2246012	6:131577068-131577068	C	intron_variant,non_coding_transcript_variant	MODIFIER	-	-	0.17	-0.42588	ARG1 (rs2781668)	1	CEU
rs2246012	6:131577068-131577068	A	intron_variant	MODIFIER	-	-	0.134	-0.474294	ARG1 (rs2781668)	1	CEU
rs2246012	6:131577068-131577068	C	intron_variant	MODIFIER	-	-	0.17	-0.42588	ARG1 (rs2781668)	1	CEU
rs2246012	6:131577068-131577068	A	intron_variant	MODIFIER	-	-	0.134	-0.474294	ARG1 (rs2781668)	1	CEU
rs2246012	6:131577068-131577068	C	intron_variant	MODIFIER	-	-	0.17	-0.42588	ARG1 (rs2781668)	1	CEU
rs2246012	6:131577068-131577068	A	intron_variant	MODIFIER	-	-	0.134	-0.474294	ARG1 (rs2781668)	1	CEU
rs2246012	6:131577068-131577068	C	intron_variant	MODIFIER	-	-	0.17	-0.42588	ARG1 (rs2781668)	1	CEU
rs2246012	6:131577068-131577068	A	intron_variant,non_coding_transcript_variant	MODIFIER	-	-	0.134	-0.474294	ARG1 (rs2781668)	1	CEU
rs2246012	6:131577068-131577068	C	intron_variant,non_coding_transcript_variant	MODIFIER	-	-	0.17	-0.42588	ARG1 (rs2781668)	1	CEU
rs2246012	6:131577068-131577068	A	intron_variant,non_coding_transcript_variant	MODIFIER	-	-	0.134	-0.474294	ARG1 (rs2781668)	1	CEU
rs2246012	6:131577068-131577068	C	intron_variant,non_coding_transcript_variant	MODIFIER	-	-	0.17	-0.42588	ARG1 (rs2781668)	1	CEU
rs2246012	6:131577068-131577068	A	intron_variant,non_coding_transcript_variant	MODIFIER	-	-	0.134	-0.474294	ARG1 (rs2781668)	1	CEU
rs2246012	6:131577068-131577068	C	intron_variant,non_coding_transcript_variant	MODIFIER	-	-	0.17	-0.42588	ARG1 (rs2781668)	1	CEU
rs2246012	6:131577068-131577068	A	intron_variant	MODIFIER	-	-	0.134	-0.474294	ARG1 (rs2781668)	1	CEU
rs2246012	6:131577068-131577068	C	intron_variant	MODIFIER	-	-	0.17	-0.42588	ARG1 (rs2781668)	1	CEU
rs2246012	6:131577068-131577068	A	intron_variant,non_coding_transcript_variant	MODIFIER	-	-	0.134	-0.474294	ARG1 (rs2781668)	1	CEU
rs2246012	6:131577068-131577068	C	intron_variant,non_coding_transcript_variant	MODIFIER	-	-	0.17	-0.42588	ARG1 (rs2781668)	1	CEU
rs2246012	6:131577068-131577068	A	intron_variant	MODIFIER	-	-	0.134	-0.474294	ARG1 (rs2781668)	1	CEU
rs2246012	6:131577068-131577068	C	intron_variant	MODIFIER	-	-	0.17	-0.42588	ARG1 (rs2781668)	1	CEU
rs2246012	6:131577068-131577068	A	intron_variant,NMD_transcript_variant	MODIFIER	-	-	0.134	-0.474294	ARG1 (rs2781668)	1	CEU
rs2246012	6:131577068-131577068	C	intron_variant,NMD_transcript_variant	MODIFIER	-	-	0.17	-0.42588	ARG1 (rs2781668)	1	CEU
rs2246012	6:131577068-131577068	A	intron_variant	MODIFIER	-	-	0.134	-0.474294	ARG1 (rs2781668)	1	CEU
rs2246012	6:131577068-131577068	C	intron_variant	MODIFIER	-	-	0.17	-0.42588	ARG1 (rs2781668)	1	CEU
rs2246012	6:131577068-131577068	A	regulatory_region_variant	MODIFIER	-	-	0.134	-0.474294	ARG1 (rs2781668)	1	CEU
rs2246012	6:131577068-131577068	C	regulatory_region_variant	MODIFIER	-	-	0.17	-0.42588	ARG1 (rs2781668)	1	CEU
rs3093819	5:87401259-87401259	A	intron_variant	MODIFIER	-	-	0.111	-0.514557	CCNH (rs2230641)	0.314	CEU
rs3093819	5:87401259-87401259	A	intron_variant,non_coding_transcript_variant	MODIFIER	-	-	0.111	-0.514557	CCNH (rs2230641)	0.314	CEU
rs3093819	5:87401259-87401259	A	intron_variant	MODIFIER	-	-	0.111	-0.514557	CCNH (rs2230641)	0.314	CEU
rs3093819	5:87401259-87401259	A	intron_variant,non_coding_transcript_variant	MODIFIER	-	-	0.111	-0.514557	CCNH (rs2230641)	0.314	CEU
rs3093819	5:87401259-87401259	A	intron_variant	MODIFIER	-	-	0.111	-0.514557	CCNH (rs2230641)	0.314	CEU
rs3093819	5:87401259-87401259	A	intron_variant,non_coding_transcript_variant	MODIFIER	-	-	0.111	-0.514557	CCNH (rs2230641)	0.314	CEU
rs3093819	5:87401259-87401259	A	intron_variant,non_coding_transcript_variant	MODIFIER	-	-	0.111	-0.514557	CCNH (rs2230641)	0.314	CEU
rs3093819	5:87401259-87401259	A	downstream_gene_variant	MODIFIER	-	-	0.111	-0.514557	CCNH (rs2230641)	0.314	CEU
rs3093819	5:87401259-87401259	A	intron_variant,NMD_transcript_variant	MODIFIER	-	-	0.111	-0.514557	CCNH (rs2230641)	0.314	CEU
rs3093819	5:87401259-87401259	A	upstream_gene_variant	MODIFIER	-	-	0.111	-0.514557	CCNH (rs2230641)	0.314	CEU
rs3093819	5:87401259-87401259	A	regulatory_region_variant	MODIFIER	-	-	0.111	-0.514557	CCNH (rs2230641)	0.314	CEU
rs3093816	5:87401570-87401570	G	intron_variant	MODIFIER	-	-	11.29	0.973557	CCNH (rs2230641)	0.314	CEU
rs3093816	5:87401570-87401570	T	intron_variant	MODIFIER	-	-	10.77	0.930404	CCNH (rs2230641)	0.314	CEU
rs3093816	5:87401570-87401570	G	intron_variant,non_coding_transcript_variant	MODIFIER	-	-	11.29	0.973557	CCNH (rs2230641)	0.314	CEU
rs3093816	5:87401570-87401570	T	intron_variant,non_coding_transcript_variant	MODIFIER	-	-	10.77	0.930404	CCNH (rs2230641)	0.314	CEU
rs3093816	5:87401570-87401570	G	intron_variant	MODIFIER	-	-	11.29	0.973557	CCNH (rs2230641)	0.314	CEU
rs3093816	5:87401570-87401570	T	intron_variant	MODIFIER	-	-	10.77	0.930404	CCNH (rs2230641)	0.314	CEU
rs3093816	5:87401570-87401570	G	intron_variant,non_coding_transcript_variant	MODIFIER	-	-	11.29	0.973557	CCNH (rs2230641)	0.314	CEU
rs3093816	5:87401570-87401570	T	intron_variant,non_coding_transcript_variant	MODIFIER	-	-	10.77	0.930404	CCNH (rs2230641)	0.314	CEU
rs3093816	5:87401570-87401570	G	intron_variant	MODIFIER	-	-	11.29	0.973557	CCNH (rs2230641)	0.314	CEU
rs3093816	5:87401570-87401570	T	intron_variant	MODIFIER	-	-	10.77	0.930404	CCNH (rs2230641)	0.314	CEU
rs3093816	5:87401570-87401570	G	intron_variant,non_coding_transcript_variant	MODIFIER	-	-	11.29	0.973557	CCNH (rs2230641)	0.314	CEU
rs3093816	5:87401570-87401570	T	intron_variant,non_coding_transcript_variant	MODIFIER	-	-	10.77	0.930404	CCNH (rs2230641)	0.314	CEU
rs3093816	5:87401570-87401570	G	intron_variant,non_coding_transcript_variant	MODIFIER	-	-	11.29	0.973557	CCNH (rs2230641)	0.314	CEU
rs3093816	5:87401570-87401570	T	intron_variant,non_coding_transcript_variant	MODIFIER	-	-	10.77	0.930404	CCNH (rs2230641)	0.314	CEU
rs3093816	5:87401570-87401570	G	downstream_gene_variant	MODIFIER	-	-	11.29	0.973557	CCNH (rs2230641)	0.314	CEU
rs3093816	5:87401570-87401570	T	downstream_gene_variant	MODIFIER	-	-	10.77	0.930404	CCNH (rs2230641)	0.314	CEU
rs3093816	5:87401570-87401570	G	intron_variant,NMD_transcript_variant	MODIFIER	-	-	11.29	0.973557	CCNH (rs2230641)	0.314	CEU
rs3093816	5:87401570-87401570	T	intron_variant,NMD_transcript_variant	MODIFIER	-	-	10.77	0.930404	CCNH (rs2230641)	0.314	CEU
rs3093816	5:87401570-87401570	G	upstream_gene_variant	MODIFIER	-	-	11.29	0.973557	CCNH (rs2230641)	0.314	CEU
rs3093816	5:87401570-87401570	T	upstream_gene_variant	MODIFIER	-	-	10.77	0.930404	CCNH (rs2230641)	0.314	CEU
rs11313236	12:123135385-123135387	CCCCCCC	intron_variant	MODIFIER	-	-	0.513	-0.199237	CDK2AP1 (rs2510885)	1	CEU
rs11313236	12:123135385-123135387	CCCCCCCC	intron_variant	MODIFIER	-	-	0.179	-0.415175	CDK2AP1 (rs2510885)	1	CEU
rs11313236	12:123135385-123135387	CCCCCCCCCC	intron_variant	MODIFIER	-	-	0.389	-0.255053	CDK2AP1 (rs2510885)	1	CEU
rs11313236	12:123135385-123135387	CCCCCCC	intron_variant	MODIFIER	-	-	0.513	-0.199237	CDK2AP1 (rs2510885)	1	CEU
rs11313236	12:123135385-123135387	CCCCCCCC	intron_variant	MODIFIER	-	-	0.179	-0.415175	CDK2AP1 (rs2510885)	1	CEU
rs11313236	12:123135385-123135387	CCCCCCCCCC	intron_variant	MODIFIER	-	-	0.389	-0.255053	CDK2AP1 (rs2510885)	1	CEU
rs1611973	12:123138184-123138184	G	intron_variant	MODIFIER	-	-	0.122	-0.494169	CDK2AP1 (rs2510885)	0.691	CEU
rs1611973	12:123138184-123138184	T	intron_variant	MODIFIER	-	-	0.15	-0.451896	CDK2AP1 (rs2510885)	0.691	CEU
rs1611973	12:123138184-123138184	G	intron_variant	MODIFIER	-	-	0.122	-0.494169	CDK2AP1 (rs2510885)	0.691	CEU
rs1611973	12:123138184-123138184	T	intron_variant	MODIFIER	-	-	0.15	-0.451896	CDK2AP1 (rs2510885)	0.691	CEU
rs1616131	12:123135291-123135291	A	intron_variant	MODIFIER	-	-	0.268	-0.331511	CDK2AP1 (rs2510885)	1	CEU
rs1616131	12:123135291-123135291	C	intron_variant	MODIFIER	-	-	0.224	-0.368206	CDK2AP1 (rs2510885)	1	CEU
rs1616131	12:123135291-123135291	A	intron_variant	MODIFIER	-	-	0.268	-0.331511	CDK2AP1 (rs2510885)	1	CEU
rs1616131	12:123135291-123135291	C	intron_variant	MODIFIER	-	-	0.224	-0.368206	CDK2AP1 (rs2510885)	1	CEU
rs1616181	12:123135309-123135309	A	intron_variant	MODIFIER	-	-	0.461	-0.220824	CDK2AP1 (rs2510885)	1	CEU
rs1616181	12:123135309-123135309	C	intron_variant	MODIFIER	-	-	0.62	-0.160692	CDK2AP1 (rs2510885)	1	CEU
rs1616181	12:123135309-123135309	G	intron_variant	MODIFIER	-	-	0.531	-0.192097	CDK2AP1 (rs2510885)	1	CEU
rs1616181	12:123135309-123135309	A	intron_variant	MODIFIER	-	-	0.461	-0.220824	CDK2AP1 (rs2510885)	1	CEU
rs1616181	12:123135309-123135309	C	intron_variant	MODIFIER	-	-	0.62	-0.160692	CDK2AP1 (rs2510885)	1	CEU
rs1616181	12:123135309-123135309	G	intron_variant	MODIFIER	-	-	0.531	-0.192097	CDK2AP1 (rs2510885)	1	CEU
rs1619561	12:123135721-123135721	C	intron_variant	MODIFIER	-	-	0.248	-0.347126	CDK2AP1 (rs2510885)	0.974	CEU
rs1619561	12:123135721-123135721	T	intron_variant	MODIFIER	-	-	0.234	-0.359284	CDK2AP1 (rs2510885)	0.974	CEU
rs1619561	12:123135721-123135721	C	intron_variant	MODIFIER	-	-	0.248	-0.347126	CDK2AP1 (rs2510885)	0.974	CEU
rs1619561	12:123135721-123135721	T	intron_variant	MODIFIER	-	-	0.234	-0.359284	CDK2AP1 (rs2510885)	0.974	CEU
rs1727294	12:123131967-123131967	C	intron_variant	MODIFIER	-	-	1.447	0.017208	CDK2AP1 (rs2510885)	1	CEU
rs1727294	12:123131967-123131967	G	intron_variant	MODIFIER	-	-	1.657	0.046875	CDK2AP1 (rs2510885)	1	CEU
rs1727294	12:123131967-123131967	T	intron_variant	MODIFIER	-	-	1.359	0.003722	CDK2AP1 (rs2510885)	1	CEU
rs1727294	12:123131967-123131967	C	intron_variant	MODIFIER	-	-	1.447	0.017208	CDK2AP1 (rs2510885)	1	CEU
rs1727294	12:123131967-123131967	G	intron_variant	MODIFIER	-	-	1.657	0.046875	CDK2AP1 (rs2510885)	1	CEU
rs1727294	12:123131967-123131967	T	intron_variant	MODIFIER	-	-	1.359	0.003722	CDK2AP1 (rs2510885)	1	CEU
rs1727295	12:123132314-123132314	A	intron_variant	MODIFIER	-	-	2.446	0.13736	CDK2AP1 (rs2510885)	0.724	CEU
rs1727295	12:123132314-123132314	C	intron_variant	MODIFIER	-	-	2.097	0.100665	CDK2AP1 (rs2510885)	0.724	CEU
rs1727295	12:123132314-123132314	A	intron_variant	MODIFIER	-	-	2.446	0.13736	CDK2AP1 (rs2510885)	0.724	CEU
rs1727295	12:123132314-123132314	C	intron_variant	MODIFIER	-	-	2.097	0.100665	CDK2AP1 (rs2510885)	0.724	CEU
rs1727316	12:123134056-123134056	A	intron_variant	MODIFIER	-	-	1.081	-0.044619	CDK2AP1 (rs2510885)	1	CEU
rs1727316	12:123134056-123134056	G	intron_variant	MODIFIER	-	-	1.173	-0.027367	CDK2AP1 (rs2510885)	1	CEU
rs1727316	12:123134056-123134056	T	intron_variant	MODIFIER	-	-	1.431	0.014905	CDK2AP1 (rs2510885)	1	CEU
rs1727316	12:123134056-123134056	A	intron_variant	MODIFIER	-	-	1.081	-0.044619	CDK2AP1 (rs2510885)	1	CEU
rs1727316	12:123134056-123134056	G	intron_variant	MODIFIER	-	-	1.173	-0.027367	CDK2AP1 (rs2510885)	1	CEU
rs1727316	12:123134056-123134056	T	intron_variant	MODIFIER	-	-	1.431	0.014905	CDK2AP1 (rs2510885)	1	CEU
rs1727317	12:123134395-123134395	A	intron_variant	MODIFIER	-	-	4.389	0.308631	CDK2AP1 (rs2510885)	1	CEU
rs1727317	12:123134395-123134395	C	intron_variant	MODIFIER	-	-	4.945	0.357045	CDK2AP1 (rs2510885)	1	CEU
rs1727317	12:123134395-123134395	G	intron_variant	MODIFIER	-	-	4.586	0.32564	CDK2AP1 (rs2510885)	1	CEU
rs1727317	12:123134395-123134395	A	intron_variant	MODIFIER	-	-	4.389	0.308631	CDK2AP1 (rs2510885)	1	CEU
rs1727317	12:123134395-123134395	C	intron_variant	MODIFIER	-	-	4.945	0.357045	CDK2AP1 (rs2510885)	1	CEU
rs1727317	12:123134395-123134395	G	intron_variant	MODIFIER	-	-	4.586	0.32564	CDK2AP1 (rs2510885)	1	CEU
rs1727318	12:123136663-123136663	A	intron_variant	MODIFIER	-	-	0.687	-0.139395	CDK2AP1 (rs2510885)	1	CEU
rs1727318	12:123136663-123136663	C	intron_variant	MODIFIER	-	-	0.866	-0.090981	CDK2AP1 (rs2510885)	1	CEU
rs1727318	12:123136663-123136663	G	intron_variant	MODIFIER	-	-	0.745	-0.122386	CDK2AP1 (rs2510885)	1	CEU
rs1727318	12:123136663-123136663	A	intron_variant	MODIFIER	-	-	0.687	-0.139395	CDK2AP1 (rs2510885)	1	CEU
rs1727318	12:123136663-123136663	C	intron_variant	MODIFIER	-	-	0.866	-0.090981	CDK2AP1 (rs2510885)	1	CEU
rs1727318	12:123136663-123136663	G	intron_variant	MODIFIER	-	-	0.745	-0.122386	CDK2AP1 (rs2510885)	1	CEU
rs1790115	12:123135723-123135723	G	intron_variant	MODIFIER	-	-	0.48	-0.212598	CDK2AP1 (rs2510885)	1	CEU
rs1790115	12:123135723-123135723	T	intron_variant	MODIFIER	-	-	0.591	-0.170326	CDK2AP1 (rs2510885)	1	CEU
rs1790115	12:123135723-123135723	G	intron_variant	MODIFIER	-	-	0.48	-0.212598	CDK2AP1 (rs2510885)	1	CEU
rs1790115	12:123135723-123135723	T	intron_variant	MODIFIER	-	-	0.591	-0.170326	CDK2AP1 (rs2510885)	1	CEU
rs1790116	12:123133997-123133997	A	intron_variant	MODIFIER	-	-	0.91	-0.08046	CDK2AP1 (rs2510885)	1	CEU
rs1790116	12:123133997-123133997	C	intron_variant	MODIFIER	-	-	0.764	-0.117155	CDK2AP1 (rs2510885)	1	CEU
rs1790116	12:123133997-123133997	T	intron_variant	MODIFIER	-	-	0.721	-0.129313	CDK2AP1 (rs2510885)	1	CEU
rs1790116	12:123133997-123133997	A	intron_variant	MODIFIER	-	-	0.91	-0.08046	CDK2AP1 (rs2510885)	1	CEU
rs1790116	12:123133997-123133997	C	intron_variant	MODIFIER	-	-	0.764	-0.117155	CDK2AP1 (rs2510885)	1	CEU
rs1790116	12:123133997-123133997	T	intron_variant	MODIFIER	-	-	0.721	-0.129313	CDK2AP1 (rs2510885)	1	CEU
rs1790119	12:123130551-123130551	A	intron_variant	MODIFIER	-	-	0.415	-0.241572	CDK2AP1 (rs2510885)	1	CEU
rs1790119	12:123130551-123130551	T	intron_variant	MODIFIER	-	-	0.558	-0.182048	CDK2AP1 (rs2510885)	1	CEU
rs1790119	12:123130551-123130551	A	intron_variant	MODIFIER	-	-	0.415	-0.241572	CDK2AP1 (rs2510885)	1	CEU
rs1790119	12:123130551-123130551	T	intron_variant	MODIFIER	-	-	0.558	-0.182048	CDK2AP1 (rs2510885)	1	CEU
rs2695482	12:123138627-123138627	G	intron_variant	MODIFIER	-	-	2.804	0.17145	CDK2AP1 (rs2510885)	1	CEU
rs2695482	12:123138627-123138627	T	intron_variant	MODIFIER	-	-	3.281	0.213722	CDK2AP1 (rs2510885)	1	CEU
rs2695482	12:123138627-123138627	G	intron_variant	MODIFIER	-	-	2.804	0.17145	CDK2AP1 (rs2510885)	1	CEU
rs2695482	12:123138627-123138627	T	intron_variant	MODIFIER	-	-	3.281	0.213722	CDK2AP1 (rs2510885)	1	CEU
rs2851441	12:123137662-123137662	C	intron_variant	MODIFIER	-	-	1.727	0.05616	CDK2AP1 (rs2510885)	1	CEU
rs2851441	12:123137662-123137662	G	intron_variant	MODIFIER	-	-	1.967	0.085828	CDK2AP1 (rs2510885)	1	CEU
rs2851441	12:123137662-123137662	T	intron_variant	MODIFIER	-	-	1.625	0.042674	CDK2AP1 (rs2510885)	1	CEU
rs2851441	12:123137662-123137662	C	intron_variant	MODIFIER	-	-	1.727	0.05616	CDK2AP1 (rs2510885)	1	CEU
rs2851441	12:123137662-123137662	G	intron_variant	MODIFIER	-	-	1.967	0.085828	CDK2AP1 (rs2510885)	1	CEU
rs2851441	12:123137662-123137662	T	intron_variant	MODIFIER	-	-	1.625	0.042674	CDK2AP1 (rs2510885)	1	CEU
rs6488864	12:123133815-123133815	A	intron_variant	MODIFIER	-	-	2.251	0.117392	CDK2AP1 (rs2510885)	1	CEU
rs6488864	12:123133815-123133815	C	intron_variant	MODIFIER	-	-	1.924	0.080697	CDK2AP1 (rs2510885)	1	CEU
rs6488864	12:123133815-123133815	T	intron_variant	MODIFIER	-	-	1.824	0.068538	CDK2AP1 (rs2510885)	1	CEU
rs6488864	12:123133815-123133815	A	intron_variant	MODIFIER	-	-	2.251	0.117392	CDK2AP1 (rs2510885)	1	CEU
rs6488864	12:123133815-123133815	C	intron_variant	MODIFIER	-	-	1.924	0.080697	CDK2AP1 (rs2510885)	1	CEU
rs6488864	12:123133815-123133815	T	intron_variant	MODIFIER	-	-	1.824	0.068538	CDK2AP1 (rs2510885)	1	CEU
rs72436741	12:123137893-123137898	AAAAAAAAAA	intron_variant	MODIFIER	-	-	1.275	-0.009781	CDK2AP1 (rs2510885)	0.458	CEU
rs72436741	12:123137893-123137898	AAAAAAAAAAAA	intron_variant	MODIFIER	-	-	1.318	-0.002823	CDK2AP1 (rs2510885)	0.458	CEU
rs72436741	12:123137893-123137898	AAAAAAAAAAAAA	intron_variant	MODIFIER	-	-	0.584	-0.173008	CDK2AP1 (rs2510885)	0.458	CEU
rs72436741	12:123137893-123137898	AAAAAAAAAAAAAA	intron_variant	MODIFIER	-	-	0.34	-0.282306	CDK2AP1 (rs2510885)	0.458	CEU
rs72436741	12:123137893-123137898	AAAAAAAAAAAAAAAA	intron_variant	MODIFIER	-	-	1.389	0.008479	CDK2AP1 (rs2510885)	0.458	CEU
rs72436741	12:123137893-123137898	AAAAAAAAAAAAAAAAA	intron_variant	MODIFIER	-	-	1.362	0.004212	CDK2AP1 (rs2510885)	0.458	CEU
rs72436741	12:123137893-123137898	AAAAAAAAAAAAAAAAAA	intron_variant	MODIFIER	-	-	1.335	-5.5e-05	CDK2AP1 (rs2510885)	0.458	CEU
rs72436741	12:123137893-123137898	AAAAAAAAAA	intron_variant	MODIFIER	-	-	1.275	-0.009781	CDK2AP1 (rs2510885)	0.458	CEU
rs72436741	12:123137893-123137898	AAAAAAAAAAAA	intron_variant	MODIFIER	-	-	1.318	-0.002823	CDK2AP1 (rs2510885)	0.458	CEU
rs72436741	12:123137893-123137898	AAAAAAAAAAAAA	intron_variant	MODIFIER	-	-	0.584	-0.173008	CDK2AP1 (rs2510885)	0.458	CEU
rs72436741	12:123137893-123137898	AAAAAAAAAAAAAA	intron_variant	MODIFIER	-	-	0.34	-0.282306	CDK2AP1 (rs2510885)	0.458	CEU
rs72436741	12:123137893-123137898	AAAAAAAAAAAAAAAA	intron_variant	MODIFIER	-	-	1.389	0.008479	CDK2AP1 (rs2510885)	0.458	CEU
rs72436741	12:123137893-123137898	AAAAAAAAAAAAAAAAA	intron_variant	MODIFIER	-	-	1.362	0.004212	CDK2AP1 (rs2510885)	0.458	CEU
rs72436741	12:123137893-123137898	AAAAAAAAAAAAAAAAAA	intron_variant	MODIFIER	-	-	1.335	-5.5e-05	CDK2AP1 (rs2510885)	0.458	CEU
rs61764202	16:30123358-30123358	T	upstream_gene_variant	MODIFIER	-	-	10.49	0.904955	MAPK3 (rs28529403)	0.639	CEU
rs61764202	16:30123358-30123358	T	upstream_gene_variant	MODIFIER	-	-	10.49	0.904955	MAPK3 (rs28529403)	0.639	CEU
rs61764202	16:30123358-30123358	T	upstream_gene_variant	MODIFIER	-	-	10.49	0.904955	MAPK3 (rs28529403)	0.639	CEU
rs61764202	16:30123358-30123358	T	upstream_gene_variant	MODIFIER	-	-	10.49	0.904955	MAPK3 (rs28529403)	0.639	CEU
rs61764202	16:30123358-30123358	T	upstream_gene_variant	MODIFIER	-	-	10.49	0.904955	MAPK3 (rs28529403)	0.639	CEU
rs61764202	16:30123358-30123358	T	upstream_gene_variant	MODIFIER	-	-	10.49	0.904955	MAPK3 (rs28529403)	0.639	CEU
rs61764202	16:30123358-30123358	T	upstream_gene_variant	MODIFIER	-	-	10.49	0.904955	MAPK3 (rs28529403)	0.639	CEU
rs61764202	16:30123358-30123358	T	intron_variant	MODIFIER	-	-	10.49	0.904955	MAPK3 (rs28529403)	0.639	CEU
rs61764202	16:30123358-30123358	T	upstream_gene_variant	MODIFIER	-	-	10.49	0.904955	MAPK3 (rs28529403)	0.639	CEU
rs61764202	16:30123358-30123358	T	upstream_gene_variant	MODIFIER	-	-	10.49	0.904955	MAPK3 (rs28529403)	0.639	CEU
rs61764202	16:30123358-30123358	T	upstream_gene_variant	MODIFIER	-	-	10.49	0.904955	MAPK3 (rs28529403)	0.639	CEU
rs61764202	16:30123358-30123358	T	regulatory_region_variant	MODIFIER	-	-	10.49	0.904955	MAPK3 (rs28529403)	0.639	CEU
rs58405293	16:30125887-30125889	TTTTTTTTTT	upstream_gene_variant	MODIFIER	-	-	1.291	-0.007156	MAPK3 (rs28529403)	0.536	CEU
rs58405293	16:30125887-30125889	TTTTTTTTTTT	upstream_gene_variant	MODIFIER	-	-	1.321	-0.002303	MAPK3 (rs28529403)	0.536	CEU
rs58405293	16:30125887-30125889	TTTTTTTTTTTTT	upstream_gene_variant	MODIFIER	-	-	1.691	0.051485	MAPK3 (rs28529403)	0.536	CEU
rs58405293	16:30125887-30125889	TTTTTTTTTTTTTTTTT	upstream_gene_variant	MODIFIER	-	-	-	-	MAPK3 (rs28529403)	0.536	CEU
rs58405293	16:30125887-30125889	TTTTTTTTTT	upstream_gene_variant	MODIFIER	-	-	1.291	-0.007156	MAPK3 (rs28529403)	0.536	CEU
rs58405293	16:30125887-30125889	TTTTTTTTTTT	upstream_gene_variant	MODIFIER	-	-	1.321	-0.002303	MAPK3 (rs28529403)	0.536	CEU
rs58405293	16:30125887-30125889	TTTTTTTTTTTTT	upstream_gene_variant	MODIFIER	-	-	1.691	0.051485	MAPK3 (rs28529403)	0.536	CEU
rs58405293	16:30125887-30125889	TTTTTTTTTTTTTTTTT	upstream_gene_variant	MODIFIER	-	-	-	-	MAPK3 (rs28529403)	0.536	CEU
rs58405293	16:30125887-30125889	TTTTTTTTTT	upstream_gene_variant	MODIFIER	-	-	1.291	-0.007156	MAPK3 (rs28529403)	0.536	CEU
rs58405293	16:30125887-30125889	TTTTTTTTTTT	upstream_gene_variant	MODIFIER	-	-	1.321	-0.002303	MAPK3 (rs28529403)	0.536	CEU
rs58405293	16:30125887-30125889	TTTTTTTTTTTTT	upstream_gene_variant	MODIFIER	-	-	1.691	0.051485	MAPK3 (rs28529403)	0.536	CEU
rs58405293	16:30125887-30125889	TTTTTTTTTTTTTTTTT	upstream_gene_variant	MODIFIER	-	-	-	-	MAPK3 (rs28529403)	0.536	CEU
rs58405293	16:30125887-30125889	TTTTTTTTTT	upstream_gene_variant	MODIFIER	-	-	1.291	-0.007156	MAPK3 (rs28529403)	0.536	CEU
rs58405293	16:30125887-30125889	TTTTTTTTTTT	upstream_gene_variant	MODIFIER	-	-	1.321	-0.002303	MAPK3 (rs28529403)	0.536	CEU
rs58405293	16:30125887-30125889	TTTTTTTTTTTTT	upstream_gene_variant	MODIFIER	-	-	1.691	0.051485	MAPK3 (rs28529403)	0.536	CEU
rs58405293	16:30125887-30125889	TTTTTTTTTTTTTTTTT	upstream_gene_variant	MODIFIER	-	-	-	-	MAPK3 (rs28529403)	0.536	CEU
rs58405293	16:30125887-30125889	TTTTTTTTTT	upstream_gene_variant	MODIFIER	-	-	1.291	-0.007156	MAPK3 (rs28529403)	0.536	CEU
rs58405293	16:30125887-30125889	TTTTTTTTTTT	upstream_gene_variant	MODIFIER	-	-	1.321	-0.002303	MAPK3 (rs28529403)	0.536	CEU
rs58405293	16:30125887-30125889	TTTTTTTTTTTTT	upstream_gene_variant	MODIFIER	-	-	1.691	0.051485	MAPK3 (rs28529403)	0.536	CEU
rs58405293	16:30125887-30125889	TTTTTTTTTTTTTTTTT	upstream_gene_variant	MODIFIER	-	-	-	-	MAPK3 (rs28529403)	0.536	CEU
rs58405293	16:30125887-30125889	TTTTTTTTTT	upstream_gene_variant	MODIFIER	-	-	1.291	-0.007156	MAPK3 (rs28529403)	0.536	CEU
rs58405293	16:30125887-30125889	TTTTTTTTTTT	upstream_gene_variant	MODIFIER	-	-	1.321	-0.002303	MAPK3 (rs28529403)	0.536	CEU
rs58405293	16:30125887-30125889	TTTTTTTTTTTTT	upstream_gene_variant	MODIFIER	-	-	1.691	0.051485	MAPK3 (rs28529403)	0.536	CEU
rs58405293	16:30125887-30125889	TTTTTTTTTTTTTTTTT	upstream_gene_variant	MODIFIER	-	-	-	-	MAPK3 (rs28529403)	0.536	CEU
rs58405293	16:30125887-30125889	TTTTTTTTTT	upstream_gene_variant	MODIFIER	-	-	1.291	-0.007156	MAPK3 (rs28529403)	0.536	CEU
rs58405293	16:30125887-30125889	TTTTTTTTTTT	upstream_gene_variant	MODIFIER	-	-	1.321	-0.002303	MAPK3 (rs28529403)	0.536	CEU
rs58405293	16:30125887-30125889	TTTTTTTTTTTTT	upstream_gene_variant	MODIFIER	-	-	1.691	0.051485	MAPK3 (rs28529403)	0.536	CEU
rs58405293	16:30125887-30125889	TTTTTTTTTTTTTTTTT	upstream_gene_variant	MODIFIER	-	-	-	-	MAPK3 (rs28529403)	0.536	CEU
rs58405293	16:30125887-30125889	TTTTTTTTTT	upstream_gene_variant	MODIFIER	-	-	1.291	-0.007156	MAPK3 (rs28529403)	0.536	CEU
rs58405293	16:30125887-30125889	TTTTTTTTTTT	upstream_gene_variant	MODIFIER	-	-	1.321	-0.002303	MAPK3 (rs28529403)	0.536	CEU
rs58405293	16:30125887-30125889	TTTTTTTTTTTTT	upstream_gene_variant	MODIFIER	-	-	1.691	0.051485	MAPK3 (rs28529403)	0.536	CEU
rs58405293	16:30125887-30125889	TTTTTTTTTTTTTTTTT	upstream_gene_variant	MODIFIER	-	-	-	-	MAPK3 (rs28529403)	0.536	CEU
rs58405293	16:30125887-30125889	TTTTTTTTTT	upstream_gene_variant	MODIFIER	-	-	1.291	-0.007156	MAPK3 (rs28529403)	0.536	CEU
rs58405293	16:30125887-30125889	TTTTTTTTTTT	upstream_gene_variant	MODIFIER	-	-	1.321	-0.002303	MAPK3 (rs28529403)	0.536	CEU
rs58405293	16:30125887-30125889	TTTTTTTTTTTTT	upstream_gene_variant	MODIFIER	-	-	1.691	0.051485	MAPK3 (rs28529403)	0.536	CEU
rs58405293	16:30125887-30125889	TTTTTTTTTTTTTTTTT	upstream_gene_variant	MODIFIER	-	-	-	-	MAPK3 (rs28529403)	0.536	CEU
rs58405293	16:30125887-30125889	TTTTTTTTTT	upstream_gene_variant	MODIFIER	-	-	1.291	-0.007156	MAPK3 (rs28529403)	0.536	CEU
rs58405293	16:30125887-30125889	TTTTTTTTTTT	upstream_gene_variant	MODIFIER	-	-	1.321	-0.002303	MAPK3 (rs28529403)	0.536	CEU
rs58405293	16:30125887-30125889	TTTTTTTTTTTTT	upstream_gene_variant	MODIFIER	-	-	1.691	0.051485	MAPK3 (rs28529403)	0.536	CEU
rs58405293	16:30125887-30125889	TTTTTTTTTTTTTTTTT	upstream_gene_variant	MODIFIER	-	-	-	-	MAPK3 (rs28529403)	0.536	CEU
rs58405293	16:30125887-30125889	TTTTTTTTTT	upstream_gene_variant	MODIFIER	-	-	1.291	-0.007156	MAPK3 (rs28529403)	0.536	CEU
rs58405293	16:30125887-30125889	TTTTTTTTTTT	upstream_gene_variant	MODIFIER	-	-	1.321	-0.002303	MAPK3 (rs28529403)	0.536	CEU
rs58405293	16:30125887-30125889	TTTTTTTTTTTTT	upstream_gene_variant	MODIFIER	-	-	1.691	0.051485	MAPK3 (rs28529403)	0.536	CEU
rs58405293	16:30125887-30125889	TTTTTTTTTTTTTTTTT	upstream_gene_variant	MODIFIER	-	-	-	-	MAPK3 (rs28529403)	0.536	CEU
rs56073702	16:30126692-30126694	TTTTTTTTTTTTT	upstream_gene_variant	MODIFIER	-	-	1.075	-0.045752	MAPK3 (rs28529403)	0.505	CEU
rs56073702	16:30126692-30126694	TTTTTTTTTTTTTT	upstream_gene_variant	MODIFIER	-	-	1.087	-0.043355	MAPK3 (rs28529403)	0.505	CEU
rs56073702	16:30126692-30126694	TTTTTTTTTTTTTTTT	upstream_gene_variant	MODIFIER	-	-	1.382	0.007414	MAPK3 (rs28529403)	0.505	CEU
rs56073702	16:30126692-30126694	TTTTTTTTTTTTTTTTT	upstream_gene_variant	MODIFIER	-	-	1.355	0.003148	MAPK3 (rs28529403)	0.505	CEU
rs56073702	16:30126692-30126694	TTTTTTTTTTTTTTTTTTT	upstream_gene_variant	MODIFIER	-	-	1.302	-0.005386	MAPK3 (rs28529403)	0.505	CEU
rs56073702	16:30126692-30126694	TTTTTTTTTTTTTTTTTTTT	upstream_gene_variant	MODIFIER	-	-	1.276	-0.009653	MAPK3 (rs28529403)	0.505	CEU
rs56073702	16:30126692-30126694	TTTTTTTTTTTTT	upstream_gene_variant	MODIFIER	-	-	1.075	-0.045752	MAPK3 (rs28529403)	0.505	CEU
rs56073702	16:30126692-30126694	TTTTTTTTTTTTTT	upstream_gene_variant	MODIFIER	-	-	1.087	-0.043355	MAPK3 (rs28529403)	0.505	CEU
rs56073702	16:30126692-30126694	TTTTTTTTTTTTTTTT	upstream_gene_variant	MODIFIER	-	-	1.382	0.007414	MAPK3 (rs28529403)	0.505	CEU
rs56073702	16:30126692-30126694	TTTTTTTTTTTTTTTTT	upstream_gene_variant	MODIFIER	-	-	1.355	0.003148	MAPK3 (rs28529403)	0.505	CEU
rs56073702	16:30126692-30126694	TTTTTTTTTTTTTTTTTTT	upstream_gene_variant	MODIFIER	-	-	1.302	-0.005386	MAPK3 (rs28529403)	0.505	CEU
rs56073702	16:30126692-30126694	TTTTTTTTTTTTTTTTTTTT	upstream_gene_variant	MODIFIER	-	-	1.276	-0.009653	MAPK3 (rs28529403)	0.505	CEU
rs56073702	16:30126692-30126694	TTTTTTTTTTTTT	upstream_gene_variant	MODIFIER	-	-	1.075	-0.045752	MAPK3 (rs28529403)	0.505	CEU
rs56073702	16:30126692-30126694	TTTTTTTTTTTTTT	upstream_gene_variant	MODIFIER	-	-	1.087	-0.043355	MAPK3 (rs28529403)	0.505	CEU
rs56073702	16:30126692-30126694	TTTTTTTTTTTTTTTT	upstream_gene_variant	MODIFIER	-	-	1.382	0.007414	MAPK3 (rs28529403)	0.505	CEU
rs56073702	16:30126692-30126694	TTTTTTTTTTTTTTTTT	upstream_gene_variant	MODIFIER	-	-	1.355	0.003148	MAPK3 (rs28529403)	0.505	CEU
rs56073702	16:30126692-30126694	TTTTTTTTTTTTTTTTTTT	upstream_gene_variant	MODIFIER	-	-	1.302	-0.005386	MAPK3 (rs28529403)	0.505	CEU
rs56073702	16:30126692-30126694	TTTTTTTTTTTTTTTTTTTT	upstream_gene_variant	MODIFIER	-	-	1.276	-0.009653	MAPK3 (rs28529403)	0.505	CEU
rs56073702	16:30126692-30126694	TTTTTTTTTTTTT	upstream_gene_variant	MODIFIER	-	-	1.075	-0.045752	MAPK3 (rs28529403)	0.505	CEU
rs56073702	16:30126692-30126694	TTTTTTTTTTTTTT	upstream_gene_variant	MODIFIER	-	-	1.087	-0.043355	MAPK3 (rs28529403)	0.505	CEU
rs56073702	16:30126692-30126694	TTTTTTTTTTTTTTTT	upstream_gene_variant	MODIFIER	-	-	1.382	0.007414	MAPK3 (rs28529403)	0.505	CEU
rs56073702	16:30126692-30126694	TTTTTTTTTTTTTTTTT	upstream_gene_variant	MODIFIER	-	-	1.355	0.003148	MAPK3 (rs28529403)	0.505	CEU
rs56073702	16:30126692-30126694	TTTTTTTTTTTTTTTTTTT	upstream_gene_variant	MODIFIER	-	-	1.302	-0.005386	MAPK3 (rs28529403)	0.505	CEU
rs56073702	16:30126692-30126694	TTTTTTTTTTTTTTTTTTTT	upstream_gene_variant	MODIFIER	-	-	1.276	-0.009653	MAPK3 (rs28529403)	0.505	CEU
rs56073702	16:30126692-30126694	TTTTTTTTTTTTT	upstream_gene_variant	MODIFIER	-	-	1.075	-0.045752	MAPK3 (rs28529403)	0.505	CEU
rs56073702	16:30126692-30126694	TTTTTTTTTTTTTT	upstream_gene_variant	MODIFIER	-	-	1.087	-0.043355	MAPK3 (rs28529403)	0.505	CEU
rs56073702	16:30126692-30126694	TTTTTTTTTTTTTTTT	upstream_gene_variant	MODIFIER	-	-	1.382	0.007414	MAPK3 (rs28529403)	0.505	CEU
rs56073702	16:30126692-30126694	TTTTTTTTTTTTTTTTT	upstream_gene_variant	MODIFIER	-	-	1.355	0.003148	MAPK3 (rs28529403)	0.505	CEU
rs56073702	16:30126692-30126694	TTTTTTTTTTTTTTTTTTT	upstream_gene_variant	MODIFIER	-	-	1.302	-0.005386	MAPK3 (rs28529403)	0.505	CEU
rs56073702	16:30126692-30126694	TTTTTTTTTTTTTTTTTTTT	upstream_gene_variant	MODIFIER	-	-	1.276	-0.009653	MAPK3 (rs28529403)	0.505	CEU
rs56073702	16:30126692-30126694	TTTTTTTTTTTTT	upstream_gene_variant	MODIFIER	-	-	1.075	-0.045752	MAPK3 (rs28529403)	0.505	CEU
rs56073702	16:30126692-30126694	TTTTTTTTTTTTTT	upstream_gene_variant	MODIFIER	-	-	1.087	-0.043355	MAPK3 (rs28529403)	0.505	CEU
rs56073702	16:30126692-30126694	TTTTTTTTTTTTTTTT	upstream_gene_variant	MODIFIER	-	-	1.382	0.007414	MAPK3 (rs28529403)	0.505	CEU
rs56073702	16:30126692-30126694	TTTTTTTTTTTTTTTTT	upstream_gene_variant	MODIFIER	-	-	1.355	0.003148	MAPK3 (rs28529403)	0.505	CEU
rs56073702	16:30126692-30126694	TTTTTTTTTTTTTTTTTTT	upstream_gene_variant	MODIFIER	-	-	1.302	-0.005386	MAPK3 (rs28529403)	0.505	CEU
rs56073702	16:30126692-30126694	TTTTTTTTTTTTTTTTTTTT	upstream_gene_variant	MODIFIER	-	-	1.276	-0.009653	MAPK3 (rs28529403)	0.505	CEU
rs56073702	16:30126692-30126694	TTTTTTTTTTTTT	upstream_gene_variant	MODIFIER	-	-	1.075	-0.045752	MAPK3 (rs28529403)	0.505	CEU
rs56073702	16:30126692-30126694	TTTTTTTTTTTTTT	upstream_gene_variant	MODIFIER	-	-	1.087	-0.043355	MAPK3 (rs28529403)	0.505	CEU
rs56073702	16:30126692-30126694	TTTTTTTTTTTTTTTT	upstream_gene_variant	MODIFIER	-	-	1.382	0.007414	MAPK3 (rs28529403)	0.505	CEU
rs56073702	16:30126692-30126694	TTTTTTTTTTTTTTTTT	upstream_gene_variant	MODIFIER	-	-	1.355	0.003148	MAPK3 (rs28529403)	0.505	CEU
rs56073702	16:30126692-30126694	TTTTTTTTTTTTTTTTTTT	upstream_gene_variant	MODIFIER	-	-	1.302	-0.005386	MAPK3 (rs28529403)	0.505	CEU
rs56073702	16:30126692-30126694	TTTTTTTTTTTTTTTTTTTT	upstream_gene_variant	MODIFIER	-	-	1.276	-0.009653	MAPK3 (rs28529403)	0.505	CEU
rs56073702	16:30126692-30126694	TTTTTTTTTTTTT	upstream_gene_variant	MODIFIER	-	-	1.075	-0.045752	MAPK3 (rs28529403)	0.505	CEU
rs56073702	16:30126692-30126694	TTTTTTTTTTTTTT	upstream_gene_variant	MODIFIER	-	-	1.087	-0.043355	MAPK3 (rs28529403)	0.505	CEU
rs56073702	16:30126692-30126694	TTTTTTTTTTTTTTTT	upstream_gene_variant	MODIFIER	-	-	1.382	0.007414	MAPK3 (rs28529403)	0.505	CEU
rs56073702	16:30126692-30126694	TTTTTTTTTTTTTTTTT	upstream_gene_variant	MODIFIER	-	-	1.355	0.003148	MAPK3 (rs28529403)	0.505	CEU
rs56073702	16:30126692-30126694	TTTTTTTTTTTTTTTTTTT	upstream_gene_variant	MODIFIER	-	-	1.302	-0.005386	MAPK3 (rs28529403)	0.505	CEU
rs56073702	16:30126692-30126694	TTTTTTTTTTTTTTTTTTTT	upstream_gene_variant	MODIFIER	-	-	1.276	-0.009653	MAPK3 (rs28529403)	0.505	CEU
rs56073702	16:30126692-30126694	TTTTTTTTTTTTT	upstream_gene_variant	MODIFIER	-	-	1.075	-0.045752	MAPK3 (rs28529403)	0.505	CEU
rs56073702	16:30126692-30126694	TTTTTTTTTTTTTT	upstream_gene_variant	MODIFIER	-	-	1.087	-0.043355	MAPK3 (rs28529403)	0.505	CEU
rs56073702	16:30126692-30126694	TTTTTTTTTTTTTTTT	upstream_gene_variant	MODIFIER	-	-	1.382	0.007414	MAPK3 (rs28529403)	0.505	CEU
rs56073702	16:30126692-30126694	TTTTTTTTTTTTTTTTT	upstream_gene_variant	MODIFIER	-	-	1.355	0.003148	MAPK3 (rs28529403)	0.505	CEU
rs56073702	16:30126692-30126694	TTTTTTTTTTTTTTTTTTT	upstream_gene_variant	MODIFIER	-	-	1.302	-0.005386	MAPK3 (rs28529403)	0.505	CEU
rs56073702	16:30126692-30126694	TTTTTTTTTTTTTTTTTTTT	upstream_gene_variant	MODIFIER	-	-	1.276	-0.009653	MAPK3 (rs28529403)	0.505	CEU
rs56073702	16:30126692-30126694	TTTTTTTTTTTTT	upstream_gene_variant	MODIFIER	-	-	1.075	-0.045752	MAPK3 (rs28529403)	0.505	CEU
rs56073702	16:30126692-30126694	TTTTTTTTTTTTTT	upstream_gene_variant	MODIFIER	-	-	1.087	-0.043355	MAPK3 (rs28529403)	0.505	CEU
rs56073702	16:30126692-30126694	TTTTTTTTTTTTTTTT	upstream_gene_variant	MODIFIER	-	-	1.382	0.007414	MAPK3 (rs28529403)	0.505	CEU
rs56073702	16:30126692-30126694	TTTTTTTTTTTTTTTTT	upstream_gene_variant	MODIFIER	-	-	1.355	0.003148	MAPK3 (rs28529403)	0.505	CEU
rs56073702	16:30126692-30126694	TTTTTTTTTTTTTTTTTTT	upstream_gene_variant	MODIFIER	-	-	1.302	-0.005386	MAPK3 (rs28529403)	0.505	CEU
rs56073702	16:30126692-30126694	TTTTTTTTTTTTTTTTTTTT	upstream_gene_variant	MODIFIER	-	-	1.276	-0.009653	MAPK3 (rs28529403)	0.505	CEU
rs56073702	16:30126692-30126694	TTTTTTTTTTTTT	upstream_gene_variant	MODIFIER	-	-	1.075	-0.045752	MAPK3 (rs28529403)	0.505	CEU
rs56073702	16:30126692-30126694	TTTTTTTTTTTTTT	upstream_gene_variant	MODIFIER	-	-	1.087	-0.043355	MAPK3 (rs28529403)	0.505	CEU
rs56073702	16:30126692-30126694	TTTTTTTTTTTTTTTT	upstream_gene_variant	MODIFIER	-	-	1.382	0.007414	MAPK3 (rs28529403)	0.505	CEU
rs56073702	16:30126692-30126694	TTTTTTTTTTTTTTTTT	upstream_gene_variant	MODIFIER	-	-	1.355	0.003148	MAPK3 (rs28529403)	0.505	CEU
rs56073702	16:30126692-30126694	TTTTTTTTTTTTTTTTTTT	upstream_gene_variant	MODIFIER	-	-	1.302	-0.005386	MAPK3 (rs28529403)	0.505	CEU
rs56073702	16:30126692-30126694	TTTTTTTTTTTTTTTTTTTT	upstream_gene_variant	MODIFIER	-	-	1.276	-0.009653	MAPK3 (rs28529403)	0.505	CEU
rs4787493	16:30128579-30128579	G	intergenic_variant	MODIFIER	-	-	1.79	0.064296	MAPK3 (rs28529403)	0.639	CEU
rs9921544	16:30128971-30128971	C	intergenic_variant	MODIFIER	-	-	0.834	-0.098924	MAPK3 (rs28529403)	0.625	CEU
rs2005219	16:30129937-30129937	C	intergenic_variant	MODIFIER	-	-	5.108	0.371465	MAPK3 (rs28529403)	0.639	CEU
rs2005219	16:30129937-30129937	G	intergenic_variant	MODIFIER	-	-	5.439	0.401133	MAPK3 (rs28529403)	0.639	CEU
rs9932466	16:30130526-30130526	A	regulatory_region_variant	MODIFIER	-	-	1.95	0.083829	MAPK3 (rs28529403)	0.625	CEU
rs9932466	16:30130526-30130526	T	regulatory_region_variant	MODIFIER	-	-	2.507	0.143354	MAPK3 (rs28529403)	0.625	CEU
rs9932466	16:30130526-30130526	A	intergenic_variant	MODIFIER	-	-	1.95	0.083829	MAPK3 (rs28529403)	0.625	CEU
rs9932466	16:30130526-30130526	T	intergenic_variant	MODIFIER	-	-	2.507	0.143354	MAPK3 (rs28529403)	0.625	CEU
rs9931927	16:30130592-30130592	A	regulatory_region_variant	MODIFIER	-	-	2.43	0.13578	MAPK3 (rs28529403)	0.625	CEU
rs9931927	16:30130592-30130592	C	regulatory_region_variant	MODIFIER	-	-	2.083	0.099085	MAPK3 (rs28529403)	0.625	CEU
rs9931927	16:30130592-30130592	A	intergenic_variant	MODIFIER	-	-	2.43	0.13578	MAPK3 (rs28529403)	0.625	CEU
rs9931927	16:30130592-30130592	C	intergenic_variant	MODIFIER	-	-	2.083	0.099085	MAPK3 (rs28529403)	0.625	CEU
rs55732507	16:30130664-30130664	C	regulatory_region_variant	MODIFIER	-	-	2.346	0.127234	MAPK3 (rs28529403)	1	CEU
rs55732507	16:30130664-30130664	C	intergenic_variant	MODIFIER	-	-	2.346	0.127234	MAPK3 (rs28529403)	1	CEU
rs57149692	16:30130700-30130700	C	regulatory_region_variant	MODIFIER	-	-	1.969	0.08606	MAPK3 (rs28529403)	1	CEU
rs57149692	16:30130700-30130700	C	intergenic_variant	MODIFIER	-	-	1.969	0.08606	MAPK3 (rs28529403)	1	CEU
rs6565175	16:30133058-30133058	G	regulatory_region_variant	MODIFIER	-	-	1.053	-0.049941	MAPK3 (rs28529403)	1	CEU
rs6565175	16:30133058-30133058	T	regulatory_region_variant	MODIFIER	-	-	1.288	-0.007668	MAPK3 (rs28529403)	1	CEU
rs6565175	16:30133058-30133058	G	intergenic_variant	MODIFIER	-	-	1.053	-0.049941	MAPK3 (rs28529403)	1	CEU
rs6565175	16:30133058-30133058	T	intergenic_variant	MODIFIER	-	-	1.288	-0.007668	MAPK3 (rs28529403)	1	CEU
rs11049137	12:27774168-27774168	A	intron_variant	MODIFIER	-	-	0.41	-0.24417	MANSC4(rs11049131)	0.359	CEU
rs71438710	12:27775770-27775772	TTTTTTTTTT	upstream_gene_variant	MODIFIER	-	-	0.819	-0.102528	MANSC4(rs11049131)	0.921	CEU
rs71438710	12:27775770-27775772	TTTTTTTTTTT	upstream_gene_variant	MODIFIER	-	-	0.859	-0.092748	MANSC4(rs11049131)	0.921	CEU
rs71438710	12:27775770-27775772	TTTTTTTTTTTTT	upstream_gene_variant	MODIFIER	-	-	1.169	-0.02804	MANSC4(rs11049131)	0.921	CEU
rs71438710	12:27775770-27775772	TTTTTTTTTTTTTT	upstream_gene_variant	MODIFIER	-	-	1.146	-0.032307	MANSC4(rs11049131)	0.921	CEU
rs71438710	12:27775770-27775772	TTTTTTTTTT	intron_variant	MODIFIER	-	-	0.819	-0.102528	MANSC4(rs11049131)	0.921	CEU
rs71438710	12:27775770-27775772	TTTTTTTTTTT	intron_variant	MODIFIER	-	-	0.859	-0.092748	MANSC4(rs11049131)	0.921	CEU
rs71438710	12:27775770-27775772	TTTTTTTTTTTTT	intron_variant	MODIFIER	-	-	1.169	-0.02804	MANSC4(rs11049131)	0.921	CEU
rs71438710	12:27775770-27775772	TTTTTTTTTTTTTT	intron_variant	MODIFIER	-	-	1.146	-0.032307	MANSC4(rs11049131)	0.921	CEU
rs71438710	12:27775770-27775772	TTTTTTTTTT	downstream_gene_variant	MODIFIER	-	-	0.819	-0.102528	MANSC4(rs11049131)	0.921	CEU
rs71438710	12:27775770-27775772	TTTTTTTTTTT	downstream_gene_variant	MODIFIER	-	-	0.859	-0.092748	MANSC4(rs11049131)	0.921	CEU
rs71438710	12:27775770-27775772	TTTTTTTTTTTTT	downstream_gene_variant	MODIFIER	-	-	1.169	-0.02804	MANSC4(rs11049131)	0.921	CEU
rs71438710	12:27775770-27775772	TTTTTTTTTTTTTT	downstream_gene_variant	MODIFIER	-	-	1.146	-0.032307	MANSC4(rs11049131)	0.921	CEU
rs61915422	12:27779629-27779629	G	upstream_gene_variant	MODIFIER	-	-	4.13	0.28634	MANSC4(rs11049131)	0.596	CEU
rs61915422	12:27779629-27779629	G	intron_variant	MODIFIER	-	-	4.13	0.28634	MANSC4(rs11049131)	0.596	CEU
rs61915422	12:27779629-27779629	G	downstream_gene_variant	MODIFIER	-	-	4.13	0.28634	MANSC4(rs11049131)	0.596	CEU
rs61915422	12:27779629-27779629	G	regulatory_region_variant	MODIFIER	-	-	4.13	0.28634	MANSC4(rs11049131)	0.596	CEU
rs223487	4:102762389-102762389	C	upstream_gene_variant	MODIFIER	-	-	2.06	0.09652	MANBA(rs223489)	0.488	CEU
rs223487	4:102762389-102762389	G	upstream_gene_variant	MODIFIER	-	-	2.336	0.126188	MANBA(rs223489)	0.488	CEU
rs223487	4:102762389-102762389	C	regulatory_region_variant	MODIFIER	-	-	2.06	0.09652	MANBA(rs223489)	0.488	CEU
rs223487	4:102762389-102762389	G	regulatory_region_variant	MODIFIER	-	-	2.336	0.126188	MANBA(rs223489)	0.488	CEU
rs67037577	4:102762857-102762857	ATAC	upstream_gene_variant	MODIFIER	-	-	-	-	MANBA(rs223489)	0.452	CEU
rs223486	4:102763796-102763796	G	upstream_gene_variant	MODIFIER	-	-	4.844	0.348241	MANBA(rs223489)	0.47	CEU
rs223485	4:102764018-102764018	A	upstream_gene_variant	MODIFIER	-	-	0.413	-0.242621	MANBA(rs223489)	0.46	CEU
rs223484	4:102764314-102764314	A	upstream_gene_variant	MODIFIER	-	-	0.873	-0.089299	MANBA(rs223489)	0.46	CEU
rs223484	4:102764314-102764314	C	upstream_gene_variant	MODIFIER	-	-	0.733	-0.125994	MANBA(rs223489)	0.46	CEU
rs223482	4:102766051-102766051	G	intergenic_variant	MODIFIER	-	-	3.726	0.251843	MANBA(rs223489)	0.47	CEU
rs223482	4:102766051-102766051	T	intergenic_variant	MODIFIER	-	-	3.223	0.20869	MANBA(rs223489)	0.47	CEU
rs59543784	4:102766650-102766650	AAAAAAAAAGAAA	intergenic_variant	MODIFIER	-	-	0.397	-0.250666	MANBA(rs223489)	0.77	CEU
rs59543784	4:102766650-102766650	AAAAAAAAGAAA	intergenic_variant	MODIFIER	-	-	0.406	-0.246399	MANBA(rs223489)	0.77	CEU
rs59543784	4:102766650-102766650	AAAAAAAAGAAAGAAA	intergenic_variant	MODIFIER	-	-	0.373	-0.263466	MANBA(rs223489)	0.77	CEU
rs59543784	4:102766650-102766650	AAAAAAAGAAA	intergenic_variant	MODIFIER	-	-	0.414	-0.242132	MANBA(rs223489)	0.77	CEU
rs59543784	4:102766650-102766650	AAAAAGAAA	intergenic_variant	MODIFIER	-	-	0.432	-0.233598	MANBA(rs223489)	0.77	CEU
rs59543784	4:102766650-102766650	AAAAAGAAAGAAA	intergenic_variant	MODIFIER	-	-	0.397	-0.250666	MANBA(rs223489)	0.77	CEU
rs59543784	4:102766650-102766650	AAAAAGAAAGAAAGAAA	intergenic_variant	MODIFIER	-	-	0.365	-0.267733	MANBA(rs223489)	0.77	CEU
rs59543784	4:102766650-102766650	AAAAAGAAAGAAAGAAAGAAA	intergenic_variant	MODIFIER	-	-	0.336	-0.284801	MANBA(rs223489)	0.77	CEU
rs59543784	4:102766650-102766650	AAAAGAAA	intergenic_variant	MODIFIER	-	-	0.442	-0.229331	MANBA(rs223489)	0.77	CEU
rs59543784	4:102766650-102766650	AAAAGAAAGAAA	intergenic_variant	MODIFIER	-	-	0.406	-0.246399	MANBA(rs223489)	0.77	CEU
rs59543784	4:102766650-102766650	AAAAGAAAGAAAGAAA	intergenic_variant	MODIFIER	-	-	0.373	-0.263466	MANBA(rs223489)	0.77	CEU
rs59543784	4:102766650-102766650	AAAAGAAAGAAAGAAAGAAA	intergenic_variant	MODIFIER	-	-	0.343	-0.280534	MANBA(rs223489)	0.77	CEU
rs59543784	4:102766650-102766650	AAAAGAAAGAAAGAAAGAAAGAAA	intergenic_variant	MODIFIER	-	-	0.315	-0.297601	MANBA(rs223489)	0.77	CEU
rs59543784	4:102766650-102766650	AAACAAAAGAAA	intergenic_variant	MODIFIER	-	-	0.406	-0.246399	MANBA(rs223489)	0.77	CEU
rs223481	4:102766860-102766860	A	intergenic_variant	MODIFIER	-	-	3.943	0.270384	MANBA(rs223489)	0.47	CEU
rs223481	4:102766860-102766860	C	intergenic_variant	MODIFIER	-	-	4.507	0.318798	MANBA(rs223489)	0.47	CEU
rs223480	4:102766881-102766881	C	intergenic_variant	MODIFIER	-	-	1.652	0.046223	MANBA(rs223489)	0.46	CEU
rs150899	4:102767912-102767912	G	intergenic_variant	MODIFIER	-	-	1.297	-0.006189	MANBA(rs223489)	0.46	CEU
rs150899	4:102767912-102767912	T	intergenic_variant	MODIFIER	-	-	1.578	0.036083	MANBA(rs223489)	0.46	CEU
rs223479	4:102768160-102768160	C	intergenic_variant	MODIFIER	-	-	0.848	-0.095229	MANBA(rs223489)	0.46	CEU
rs223479	4:102768160-102768160	G	intergenic_variant	MODIFIER	-	-	0.73	-0.126634	MANBA(rs223489)	0.46	CEU
rs223478	4:102768648-102768648	A	intergenic_variant	MODIFIER	-	-	2.921	0.182009	MANBA(rs223489)	0.47	CEU
rs223478	4:102768648-102768648	G	intergenic_variant	MODIFIER	-	-	3.112	0.199018	MANBA(rs223489)	0.47	CEU
rs223477	4:102769099-102769099	C	intergenic_variant	MODIFIER	-	-	7.962	0.646965	MANBA(rs223489)	0.46	CEU
rs223477	4:102769099-102769099	G	intergenic_variant	MODIFIER	-	-	8.239	0.676632	MANBA(rs223489)	0.46	CEU
rs223477	4:102769099-102769099	T	intergenic_variant	MODIFIER	-	-	7.834	0.633479	MANBA(rs223489)	0.46	CEU
rs150898	4:102769234-102769234	A	intergenic_variant	MODIFIER	-	-	4.924	0.355275	MANBA(rs223489)	0.47	CEU
rs150898	4:102769234-102769234	C	intergenic_variant	MODIFIER	-	-	5.468	0.403689	MANBA(rs223489)	0.47	CEU
rs150897	4:102769309-102769309	T	intergenic_variant	MODIFIER	-	-	5.081	0.369115	MANBA(rs223489)	0.46	CEU
rs227371	4:102690980-102690980	A	intron_variant	MODIFIER	-	-	0.299	-0.308252	MANBA(rs227370)	1	CEU
rs227371	4:102690980-102690980	C	intron_variant	MODIFIER	-	-	0.354	-0.273785	MANBA(rs227370)	1	CEU
rs227371	4:102690980-102690980	T	intron_variant	MODIFIER	-	-	0.319	-0.295344	MANBA(rs227370)	1	CEU
rs227371	4:102690980-102690980	A	intron_variant,non_coding_transcript_variant	MODIFIER	-	-	0.299	-0.308252	MANBA(rs227370)	1	CEU
rs227371	4:102690980-102690980	C	intron_variant,non_coding_transcript_variant	MODIFIER	-	-	0.354	-0.273785	MANBA(rs227370)	1	CEU
rs227371	4:102690980-102690980	T	intron_variant,non_coding_transcript_variant	MODIFIER	-	-	0.319	-0.295344	MANBA(rs227370)	1	CEU
rs227371	4:102690980-102690980	A	intron_variant,NMD_transcript_variant	MODIFIER	-	-	0.299	-0.308252	MANBA(rs227370)	1	CEU
rs227371	4:102690980-102690980	C	intron_variant,NMD_transcript_variant	MODIFIER	-	-	0.354	-0.273785	MANBA(rs227370)	1	CEU
rs227371	4:102690980-102690980	T	intron_variant,NMD_transcript_variant	MODIFIER	-	-	0.319	-0.295344	MANBA(rs227370)	1	CEU
rs227371	4:102690980-102690980	A	regulatory_region_variant	MODIFIER	-	-	0.299	-0.308252	MANBA(rs227370)	1	CEU
rs227371	4:102690980-102690980	C	regulatory_region_variant	MODIFIER	-	-	0.354	-0.273785	MANBA(rs227370)	1	CEU
rs227371	4:102690980-102690980	T	regulatory_region_variant	MODIFIER	-	-	0.319	-0.295344	MANBA(rs227370)	1	CEU
rs227372	4:102691760-102691760	A	intron_variant	MODIFIER	-	-	3.735	0.252626	MANBA(rs227370)	1	CEU
rs227372	4:102691760-102691760	C	intron_variant	MODIFIER	-	-	4.301	0.30104	MANBA(rs227370)	1	CEU
rs227372	4:102691760-102691760	G	intron_variant	MODIFIER	-	-	3.934	0.269634	MANBA(rs227370)	1	CEU
rs227372	4:102691760-102691760	A	intron_variant,non_coding_transcript_variant	MODIFIER	-	-	3.735	0.252626	MANBA(rs227370)	1	CEU
rs227372	4:102691760-102691760	C	intron_variant,non_coding_transcript_variant	MODIFIER	-	-	4.301	0.30104	MANBA(rs227370)	1	CEU
rs227372	4:102691760-102691760	G	intron_variant,non_coding_transcript_variant	MODIFIER	-	-	3.934	0.269634	MANBA(rs227370)	1	CEU
rs227372	4:102691760-102691760	A	intron_variant,NMD_transcript_variant	MODIFIER	-	-	3.735	0.252626	MANBA(rs227370)	1	CEU
rs227372	4:102691760-102691760	C	intron_variant,NMD_transcript_variant	MODIFIER	-	-	4.301	0.30104	MANBA(rs227370)	1	CEU
rs227372	4:102691760-102691760	G	intron_variant,NMD_transcript_variant	MODIFIER	-	-	3.934	0.269634	MANBA(rs227370)	1	CEU
rs227372	4:102691760-102691760	A	regulatory_region_variant	MODIFIER	-	-	3.735	0.252626	MANBA(rs227370)	1	CEU
rs227372	4:102691760-102691760	C	regulatory_region_variant	MODIFIER	-	-	4.301	0.30104	MANBA(rs227370)	1	CEU
rs227372	4:102691760-102691760	G	regulatory_region_variant	MODIFIER	-	-	3.934	0.269634	MANBA(rs227370)	1	CEU
rs227373	4:102692109-102692109	G	intron_variant	MODIFIER	-	-	0.986	-0.06383	MANBA(rs227370)	1	CEU
rs227373	4:102692109-102692109	G	intron_variant,non_coding_transcript_variant	MODIFIER	-	-	0.986	-0.06383	MANBA(rs227370)	1	CEU
rs227373	4:102692109-102692109	G	intron_variant,NMD_transcript_variant	MODIFIER	-	-	0.986	-0.06383	MANBA(rs227370)	1	CEU
rs227373	4:102692109-102692109	G	regulatory_region_variant	MODIFIER	-	-	0.986	-0.06383	MANBA(rs227370)	1	CEU
rs227374	4:102692142-102692142	G	intron_variant	MODIFIER	-	-	3.082	0.19636	MANBA(rs227370)	1	CEU
rs227374	4:102692142-102692142	T	intron_variant	MODIFIER	-	-	2.609	0.153207	MANBA(rs227370)	1	CEU
rs227374	4:102692142-102692142	G	intron_variant,non_coding_transcript_variant	MODIFIER	-	-	3.082	0.19636	MANBA(rs227370)	1	CEU
rs227374	4:102692142-102692142	T	intron_variant,non_coding_transcript_variant	MODIFIER	-	-	2.609	0.153207	MANBA(rs227370)	1	CEU
rs227374	4:102692142-102692142	G	intron_variant,NMD_transcript_variant	MODIFIER	-	-	3.082	0.19636	MANBA(rs227370)	1	CEU
rs227374	4:102692142-102692142	T	intron_variant,NMD_transcript_variant	MODIFIER	-	-	2.609	0.153207	MANBA(rs227370)	1	CEU
rs227374	4:102692142-102692142	G	regulatory_region_variant	MODIFIER	-	-	3.082	0.19636	MANBA(rs227370)	1	CEU
rs227374	4:102692142-102692142	T	regulatory_region_variant	MODIFIER	-	-	2.609	0.153207	MANBA(rs227370)	1	CEU
rs227375	4:102696866-102696866	C	intron_variant	MODIFIER	-	-	0.335	-0.285211	MANBA(rs227370)	0.452	CEU
rs227375	4:102696866-102696866	C	intron_variant,non_coding_transcript_variant	MODIFIER	-	-	0.335	-0.285211	MANBA(rs227370)	0.452	CEU
rs227375	4:102696866-102696866	C	intron_variant,NMD_transcript_variant	MODIFIER	-	-	0.335	-0.285211	MANBA(rs227370)	0.452	CEU
rs227375	4:102696866-102696866	C	regulatory_region_variant	MODIFIER	-	-	0.335	-0.285211	MANBA(rs227370)	0.452	CEU
rs227376	4:102697904-102697904	A	intron_variant	MODIFIER	-	-	0.337	-0.283914	MANBA(rs227370)	0.976	CEU
rs227376	4:102697904-102697904	A	intron_variant,non_coding_transcript_variant	MODIFIER	-	-	0.337	-0.283914	MANBA(rs227370)	0.976	CEU
rs227376	4:102697904-102697904	A	intron_variant,NMD_transcript_variant	MODIFIER	-	-	0.337	-0.283914	MANBA(rs227370)	0.976	CEU
rs227377	4:102698179-102698179	A	intron_variant	MODIFIER	-	-	8.096	0.661241	MANBA(rs227370)	0.906	CEU
rs227377	4:102698179-102698179	T	intron_variant	MODIFIER	-	-	8.645	0.720765	MANBA(rs227370)	0.906	CEU
rs227377	4:102698179-102698179	A	intron_variant,non_coding_transcript_variant	MODIFIER	-	-	8.096	0.661241	MANBA(rs227370)	0.906	CEU
rs227377	4:102698179-102698179	T	intron_variant,non_coding_transcript_variant	MODIFIER	-	-	8.645	0.720765	MANBA(rs227370)	0.906	CEU
rs227377	4:102698179-102698179	A	intron_variant,NMD_transcript_variant	MODIFIER	-	-	8.096	0.661241	MANBA(rs227370)	0.906	CEU
rs227377	4:102698179-102698179	T	intron_variant,NMD_transcript_variant	MODIFIER	-	-	8.645	0.720765	MANBA(rs227370)	0.906	CEU
rs227378	4:102699228-102699228	A	intron_variant	MODIFIER	-	-	2.155	0.107064	MANBA(rs227370)	0.906	CEU
rs227378	4:102699228-102699228	A	intron_variant,non_coding_transcript_variant	MODIFIER	-	-	2.155	0.107064	MANBA(rs227370)	0.906	CEU
rs227378	4:102699228-102699228	A	intron_variant,NMD_transcript_variant	MODIFIER	-	-	2.155	0.107064	MANBA(rs227370)	0.906	CEU
rs227288	4:102699661-102699661	C	intron_variant	MODIFIER	-	-	0.895	-0.084078	MANBA(rs227370)	0.734	CEU
rs227288	4:102699661-102699661	T	intron_variant	MODIFIER	-	-	0.844	-0.096237	MANBA(rs227370)	0.734	CEU
rs227288	4:102699661-102699661	C	intron_variant,non_coding_transcript_variant	MODIFIER	-	-	0.895	-0.084078	MANBA(rs227370)	0.734	CEU
rs227288	4:102699661-102699661	T	intron_variant,non_coding_transcript_variant	MODIFIER	-	-	0.844	-0.096237	MANBA(rs227370)	0.734	CEU
rs227288	4:102699661-102699661	C	intron_variant,NMD_transcript_variant	MODIFIER	-	-	0.895	-0.084078	MANBA(rs227370)	0.734	CEU
rs227288	4:102699661-102699661	T	intron_variant,NMD_transcript_variant	MODIFIER	-	-	0.844	-0.096237	MANBA(rs227370)	0.734	CEU
rs227289	4:102699672-102699672	G	intron_variant	MODIFIER	-	-	2.407	0.133421	MANBA(rs227370)	0.686	CEU
rs227289	4:102699672-102699672	G	intron_variant,non_coding_transcript_variant	MODIFIER	-	-	2.407	0.133421	MANBA(rs227370)	0.686	CEU
rs227289	4:102699672-102699672	G	intron_variant,NMD_transcript_variant	MODIFIER	-	-	2.407	0.133421	MANBA(rs227370)	0.686	CEU
rs4326	17:63485881-63485881	G	intron_variant	MODIFIER	-	-	0.299	-0.308252	ACE(rs4344)	1	CEU
rs4327	17:63485912-63485912	C	intron_variant	MODIFIER	-	-	0.354	-0.273785	ACE(rs4344)	1	CEU
rs4329	17:63486097-63486097	A	intron_variant	MODIFIER	-	-	0.319	-0.295344	ACE(rs4344)	1	CEU
rs4331	17:63486691-63486691	A	synonymous_variant,non_coding_transcript_variant,coding_sequence_variant	MODIFIER	-	-	0.299	-0.308252	ACE(rs4344)	1	CEU
rs4332	17:63486920-63486920	T	intron_variant	MODIFIER	-	-	0.354	-0.273785	ACE(rs4344)	1	CEU
rs4336	17:63487770-63487770	T	intron_variant	MODIFIER	-	-	0.319	-0.295344	ACE(rs4344)	1	CEU
rs4337	17:63487772-63487772	G	intron_variant	MODIFIER	-	-	0.299	-0.308252	ACE(rs4344)	1	CEU
rs1987692	17:63488164-63488164	T	intron_variant	MODIFIER	-	-	0.354	-0.273785	ACE(rs4344)	1	CEU
rs4341	17:63488629-63488629	G	intron_variant,non_coding_transcript_variant	MODIFIER	-	-	0.319	-0.295344	ACE(rs4344)	1	CEU
rs4342	17:63488637-63488637	A	intron_variant,non_coding_transcript_variant	MODIFIER	-	-	0.299	-0.308252	ACE(rs4344)	1	CEU
rs4359	17:63494982-63494982	T	intron_variant	MODIFIER	-	-	0.354	-0.273785	ACE(rs4344)	0.9799	CEU
rs4324	17:63485810-63485810	A	intron_variant	MODIFIER	-	-	0.319	-0.295344	ACE(rs4344)	0.9799	CEU
rs4325	17:63485839-63485839	C	intron_variant	MODIFIER	-	-	3.735	0.252626	ACE(rs4344)	0.9799	CEU
rs4333	17:61564522-61564522	T	intron_variant	MODIFIER	-	-	4.301	0.30104	ACE(rs4344)	0.9603	CEU
rs4335	17:61565025-61565025	G	intron_variant	MODIFIER	-	-	3.934	0.269634	ACE(rs4344)	0.9603	CEU
rs4343	17:61566031-61566031	G	synonymous_variant,non_coding_transcript_variant,coding_sequence_variant	MODIFIER	-	-	3.735	0.252626	ACE(rs4344)	0.9603	CEU
rs4316	17:61562309-61562309	C	missense_variant, intron_variant,non_coding_transcript_variant,coding_sequence_variant,stop_gained,5_prime	MODIFIER	-	-	4.301	0.30104	ACE(rs4344)	0.9598	CEU
rs4319	17:61562491-61562491	-	intron_variant	MODIFIER	-	-	3.934	0.269634	ACE(rs4344)	0.9598	CEU
rs4320	17:61562553-61562553	G	intron_variant	MODIFIER	-	-	3.735	0.252626	ACE(rs4344)	0.9598	CEU
rs4321	17:61562774-61562774	T	intron_variant	MODIFIER	-	-	4.301	0.30104	ACE(rs4344)	0.9598	CEU
rs4323	17:61562954-61562954	C	intron_variant	MODIFIER	-	-	3.934	0.269634	ACE(rs4344)	0.9598	CEU
rs4353	17:61570422-61570422	A	intron_variant	MODIFIER	-	-	3.735	0.252626	ACE(rs4344)	0.9598	CEU
rs4351	17:61569732-61569732	G	intron_variant	MODIFIER	-	-	4.301	0.30104	ACE(rs4344)	0.9402	CEU
rs4334	17:61564940-61564940	A	intron_variant	MODIFIER	-	-	3.934	0.269634	ACE(rs4344)	0.9222	CEU
rs4363	17:61574492-61574492	G	intron_variant	MODIFIER	-	-	0.986	-0.06383	ACE(rs4344)	0.9204	CEU
rs4362	17:61573761-61573761	T	missense_variant, intron_variant,non_coding_transcript_variant,coding_sequence_variant,synonymous_variant	MODIFIER	-	-	0.986	-0.06383	ACE(rs4344)	0.9204	CEU
rs1055086	17:61575637-61575637	A	genic_downstream_transcript_variant,3_prime_UTR_variant,non_coding_transcript_variant	MODIFIER	-	-	0.986	-0.06383	ACE(rs4344)	0.8824	CEU
rs1799763	17:61575459-61575459	-	downstream_transcript_variant,3_prime_UTR_variant,non_coding_transcript_variant,genic_downstream_transcript_variant	MODIFIER	-	-	0.986	-0.06383	ACE(rs4344)	0.8824	CEU
rs61652119	11:20933724-20933724	A	intron_variant	MODIFIER	-	-	2.422	0.134959	NELL1(rs16907058)	1	CEU
rs61652119	11:20933724-20933724	A	upstream_gene_variant	MODIFIER	-	-	2.422	0.134959	NELL1(rs16907058)	1	CEU
rs16907072	11:20935979-20935979	C	intron_variant	MODIFIER	-	-	4.265	0.297945	NELL1(rs16907058)	0.524	CEU
rs16907072	11:20935979-20935979	C	intron_variant,non_coding_transcript_variant	MODIFIER	-	-	4.265	0.297945	NELL1(rs16907058)	0.524	CEU
rs12277453	11:20936480-20936480	A	intron_variant	MODIFIER	-	-	0.889	-0.085537	NELL1(rs16907058)	0.912	CEU
rs12277453	11:20936480-20936480	A	intron_variant,non_coding_transcript_variant	MODIFIER	-	-	0.889	-0.085537	NELL1(rs16907058)	0.912	CEU
rs59620090	11:20937009-20937010	TTTTTT	intron_variant	MODIFIER	-	-	0.152	-0.448281	NELL1(rs16907058)	0.407	CEU
rs59620090	11:20937009-20937010	TTTTTT	intron_variant,non_coding_transcript_variant	MODIFIER	-	-	0.152	-0.448281	NELL1(rs16907058)	0.407	CEU
rs7930772	11:20937458-20937458	T	intron_variant	MODIFIER	-	-	0.076	-0.592185	NELL1(rs16907058)	0.912	CEU
rs7930772	11:20937458-20937458	T	intron_variant,non_coding_transcript_variant	MODIFIER	-	-	0.076	-0.592185	NELL1(rs16907058)	0.912	CEU
rs8176786	11:20937848-20937848	T	missense_variant	MODERATE	tolerated(0.2)	benign(0.001)	23	2.77273	NELL1(rs16907058)	1	CEU
rs8176786	11:20937848-20937848	T	missense_variant	MODERATE	tolerated(0.2)	possibly_damaging(0.59)	23	2.77273	NELL1(rs16907058)	1	CEU
rs8176786	11:20937848-20937848	T	missense_variant	MODERATE	tolerated(0.2)	benign(0)	23	2.77273	NELL1(rs16907058)	1	CEU
rs8176786	11:20937848-20937848	T	non_coding_transcript_exon_variant	MODIFIER	-	-	23	2.77273	NELL1(rs16907058)	1	CEU
rs8176786	11:20937848-20937848	T	missense_variant	MODERATE	tolerated(0.2)	benign(0.022)	23	2.77273	NELL1(rs16907058)	1	CEU
rs217184	16:72072066-72072066	A	intron_variant	MODIFIER	-	-	2.833	0.174075	HP(rs217184)	1	CEU
rs217184	16:72072066-72072066	C	intron_variant	MODIFIER	-	-	3.383	0.222489	HP(rs217184)	1	CEU
rs217184	16:72072066-72072066	A	intron_variant,non_coding_transcript_variant	MODIFIER	-	-	2.833	0.174075	HP(rs217184)	1	CEU
rs217184	16:72072066-72072066	C	intron_variant,non_coding_transcript_variant	MODIFIER	-	-	3.383	0.222489	HP(rs217184)	1	CEU
rs217184	16:72072066-72072066	A	intron_variant,NMD_transcript_variant	MODIFIER	-	-	2.833	0.174075	HP(rs217184)	1	CEU
rs217184	16:72072066-72072066	C	intron_variant,NMD_transcript_variant	MODIFIER	-	-	3.383	0.222489	HP(rs217184)	1	CEU
rs1065075	6:31505784-31505784	G	missense_variant	MODERATE	tolerated(1)	benign(0.011)	0.47	-0.216908	MICB(rs2855812)	0.805	CEU
rs1065075	6:31505784-31505784	G	missense_variant	MODERATE	tolerated(1)	benign(0.009)	0.47	-0.216908	MICB(rs2855812)	0.805	CEU
rs1065075	6:31505784-31505784	G	upstream_gene_variant	MODIFIER	-	-	0.47	-0.216908	MICB(rs2855812)	0.805	CEU
rs1065075	6:31505784-31505784	G	missense_variant	MODERATE	tolerated(1)	benign(0.011)	0.47	-0.216908	MICB(rs2855812)	0.805	CEU
rs3130616	6:31505969-31505969	A	intron_variant	MODIFIER	-	-	0.239	-0.354968	MICB(rs2855812)	0.447	CEU
rs3130616	6:31505969-31505969	A	intron_variant	MODIFIER	-	-	0.239	-0.354968	MICB(rs2855812)	0.447	CEU
rs3130616	6:31505969-31505969	A	non_coding_transcript_exon_variant	MODIFIER	-	-	0.239	-0.354968	MICB(rs2855812)	0.447	CEU
rs3130616	6:31505969-31505969	A	intron_variant	MODIFIER	-	-	0.239	-0.354968	MICB(rs2855812)	0.447	CEU
rs3134900	6:31506180-31506180	G	missense_variant	MODERATE	tolerated(0.09)	probably_damaging(0.987)	13.3	1.15879	MICB(rs2855812)	0.447	CEU
rs3134900	6:31506180-31506180	G	intron_variant	MODIFIER	-	-	13.3	1.15879	MICB(rs2855812)	0.447	CEU
rs3134900	6:31506180-31506180	G	non_coding_transcript_exon_variant	MODIFIER	-	-	13.3	1.15879	MICB(rs2855812)	0.447	CEU
rs3134900	6:31506180-31506180	G	missense_variant	MODERATE	tolerated(0.08)	probably_damaging(0.992)	13.3	1.15879	MICB(rs2855812)	0.447	CEU
rs1051788	6:31506223-31506223	A	missense_variant	MODERATE	tolerated(0.2)	benign(0.034)	5.289	0.387669	MICB(rs2855812)	0.805	CEU
rs1051788	6:31506223-31506223	C	missense_variant	MODERATE	deleterious(0)	probably_damaging(0.967)	16.34	1.59427	MICB(rs2855812)	0.805	CEU
rs1051788	6:31506223-31506223	T	missense_variant	MODERATE	deleterious(0.02)	probably_damaging(0.99)	16.95	1.6884	MICB(rs2855812)	0.805	CEU
rs1051788	6:31506223-31506223	A	intron_variant	MODIFIER	-	-	5.289	0.387669	MICB(rs2855812)	0.805	CEU
rs1051788	6:31506223-31506223	C	intron_variant	MODIFIER	-	-	16.34	1.59427	MICB(rs2855812)	0.805	CEU
rs1051788	6:31506223-31506223	T	intron_variant	MODIFIER	-	-	16.95	1.6884	MICB(rs2855812)	0.805	CEU
rs1051788	6:31506223-31506223	A	non_coding_transcript_exon_variant	MODIFIER	-	-	5.289	0.387669	MICB(rs2855812)	0.805	CEU
rs1051788	6:31506223-31506223	C	non_coding_transcript_exon_variant	MODIFIER	-	-	16.34	1.59427	MICB(rs2855812)	0.805	CEU
rs1051788	6:31506223-31506223	T	non_coding_transcript_exon_variant	MODIFIER	-	-	16.95	1.6884	MICB(rs2855812)	0.805	CEU
rs1051788	6:31506223-31506223	A	missense_variant	MODERATE	tolerated(0.2)	benign(0.015)	5.289	0.387669	MICB(rs2855812)	0.805	CEU
rs1051788	6:31506223-31506223	C	missense_variant	MODERATE	deleterious(0.01)	probably_damaging(0.928)	16.34	1.59427	MICB(rs2855812)	0.805	CEU
rs1051788	6:31506223-31506223	T	missense_variant	MODERATE	deleterious(0.02)	probably_damaging(0.976)	16.95	1.6884	MICB(rs2855812)	0.805	CEU
rs2242955	6:31506503-31506503	A	intron_variant	MODIFIER	-	-	0.222	-0.370043	MICB(rs2855812)	0.425	CEU
rs2242955	6:31506503-31506503	A	intron_variant	MODIFIER	-	-	0.222	-0.370043	MICB(rs2855812)	0.425	CEU
rs2242955	6:31506503-31506503	A	intron_variant,non_coding_transcript_variant	MODIFIER	-	-	0.222	-0.370043	MICB(rs2855812)	0.425	CEU
rs2242955	6:31506503-31506503	A	intron_variant	MODIFIER	-	-	0.222	-0.370043	MICB(rs2855812)	0.403	CEU
rs2844500	6:31506908-31506908	T	intron_variant	MODIFIER	-	-	0.072	-0.602089	MICB(rs2855812)	0.403	CEU
rs2844500	6:31506908-31506908	T	intron_variant	MODIFIER	-	-	0.072	-0.602089	MICB(rs2855812)	0.403	CEU
rs2844500	6:31506908-31506908	T	intron_variant,non_coding_transcript_variant	MODIFIER	-	-	0.072	-0.602089	MICB(rs2855812)	0.403	CEU
rs2844500	6:31506908-31506908	T	intron_variant	MODIFIER	-	-	0.072	-0.602089	MICB(rs2855812)	0.784	CEU
rs2844499	6:31508136-31508136	T	intron_variant	MODIFIER	-	-	0.736	-0.125053	MICB(rs2855812)	0.784	CEU
rs2844499	6:31508136-31508136	T	intron_variant	MODIFIER	-	-	0.736	-0.125053	MICB(rs2855812)	0.784	CEU
rs2844499	6:31508136-31508136	T	downstream_gene_variant	MODIFIER	-	-	0.736	-0.125053	MICB(rs2855812)	0.784	CEU
rs2844499	6:31508136-31508136	T	intron_variant	MODIFIER	-	-	0.736	-0.125053	MICB(rs2855812)	0.784	CEU
rs3130614	6:31508681-31508681	A	intron_variant	MODIFIER	-	-	5.897	0.44291	MICB(rs2855812)	0.447	CEU
rs3130614	6:31508681-31508681	A	intron_variant	MODIFIER	-	-	5.897	0.44291	MICB(rs2855812)	0.447	CEU
rs3130614	6:31508681-31508681	A	downstream_gene_variant	MODIFIER	-	-	5.897	0.44291	MICB(rs2855812)	0.447	CEU
rs3130614	6:31508681-31508681	A	intron_variant	MODIFIER	-	-	5.897	0.44291	MICB(rs2855812)	0.447	CEU
rs2246618	6:31511209-31511209	T	downstream_gene_variant	MODIFIER	-	-	3.928	0.269082	MICB(rs2855812)	0.805	CEU
rs2246618	6:31511209-31511209	T	downstream_gene_variant	MODIFIER	-	-	3.928	0.269082	MICB(rs2855812)	0.805	CEU
rs2246618	6:31511209-31511209	T	downstream_gene_variant	MODIFIER	-	-	3.928	0.269082	MICB(rs2855812)	0.805	CEU
rs2246618	6:31511209-31511209	T	upstream_gene_variant	MODIFIER	-	-	3.928	0.269082	MICB(rs2855812)	0.805	CEU
rs2246618	6:31511209-31511209	T	downstream_gene_variant	MODIFIER	-	-	3.928	0.269082	MICB(rs2855812)	0.805	CEU
rs2844497	6:31512356-31512356	A	downstream_gene_variant	MODIFIER	-	-	0.365	-0.267649	MICB(rs2855812)	0.403	CEU
rs2844497	6:31512356-31512356	T	downstream_gene_variant	MODIFIER	-	-	0.491	-0.208124	MICB(rs2855812)	0.403	CEU
rs2844497	6:31512356-31512356	A	downstream_gene_variant	MODIFIER	-	-	0.365	-0.267649	MICB(rs2855812)	0.403	CEU
rs2844497	6:31512356-31512356	T	downstream_gene_variant	MODIFIER	-	-	0.491	-0.208124	MICB(rs2855812)	0.403	CEU
rs2844497	6:31512356-31512356	A	downstream_gene_variant	MODIFIER	-	-	0.365	-0.267649	MICB(rs2855812)	0.403	CEU
rs2844497	6:31512356-31512356	T	downstream_gene_variant	MODIFIER	-	-	0.491	-0.208124	MICB(rs2855812)	0.403	CEU
rs2844497	6:31512356-31512356	A	upstream_gene_variant	MODIFIER	-	-	0.365	-0.267649	MICB(rs2855812)	0.403	CEU
rs2844497	6:31512356-31512356	T	upstream_gene_variant	MODIFIER	-	-	0.491	-0.208124	MICB(rs2855812)	0.403	CEU
rs2844497	6:31512356-31512356	A	downstream_gene_variant	MODIFIER	-	-	0.365	-0.267649	MICB(rs2855812)	0.403	CEU
rs2844497	6:31512356-31512356	T	downstream_gene_variant	MODIFIER	-	-	0.491	-0.208124	MICB(rs2855812)	0.403	CEU
rs2516404	6:31512967-31512967	A	downstream_gene_variant	MODIFIER	-	-	3.139	0.201312	MICB(rs2855812)	0.403	CEU
rs2516404	6:31512967-31512967	C	downstream_gene_variant	MODIFIER	-	-	2.73	0.164617	MICB(rs2855812)	0.403	CEU
rs2516404	6:31512967-31512967	T	downstream_gene_variant	MODIFIER	-	-	2.601	0.152459	MICB(rs2855812)	0.403	CEU
rs2516404	6:31512967-31512967	A	downstream_gene_variant	MODIFIER	-	-	3.139	0.201312	MICB(rs2855812)	0.403	CEU
rs2516404	6:31512967-31512967	C	downstream_gene_variant	MODIFIER	-	-	2.73	0.164617	MICB(rs2855812)	0.403	CEU
rs2516404	6:31512967-31512967	T	downstream_gene_variant	MODIFIER	-	-	2.601	0.152459	MICB(rs2855812)	0.403	CEU
rs2516404	6:31512967-31512967	A	upstream_gene_variant	MODIFIER	-	-	3.139	0.201312	MICB(rs2855812)	0.403	CEU
rs2516404	6:31512967-31512967	C	upstream_gene_variant	MODIFIER	-	-	2.73	0.164617	MICB(rs2855812)	0.403	CEU
rs2516404	6:31512967-31512967	T	upstream_gene_variant	MODIFIER	-	-	2.601	0.152459	MICB(rs2855812)	0.403	CEU
rs2516404	6:31512967-31512967	A	downstream_gene_variant	MODIFIER	-	-	3.139	0.201312	MICB(rs2855812)	0.403	CEU
rs2516404	6:31512967-31512967	C	downstream_gene_variant	MODIFIER	-	-	2.73	0.164617	MICB(rs2855812)	0.403	CEU
rs2516404	6:31512967-31512967	T	downstream_gene_variant	MODIFIER	-	-	2.601	0.152459	MICB(rs2855812)	0.403	CEU
rs2516400	6:31513328-31513328	A	downstream_gene_variant	MODIFIER	-	-	0.494	-0.206784	MICB(rs2855812)	0.784	CEU
rs2516400	6:31513328-31513328	A	downstream_gene_variant	MODIFIER	-	-	0.494	-0.206784	MICB(rs2855812)	0.784	CEU
rs2516400	6:31513328-31513328	A	upstream_gene_variant	MODIFIER	-	-	0.494	-0.206784	MICB(rs2855812)	0.784	CEU
rs2516400	6:31513328-31513328	A	downstream_gene_variant	MODIFIER	-	-	0.494	-0.206784	MICB(rs2855812)	0.784	CEU
rs2516400	6:31513328-31513328	A	regulatory_region_variant	MODIFIER	-	-	0.494	-0.206784	MICB(rs2855812)	0.447	CEU
rs3130612	6:31514320-31514320	G	downstream_gene_variant	MODIFIER	-	-	5.768	0.430987	MICB(rs2855812)	0.447	CEU
rs3130612	6:31514320-31514320	G	downstream_gene_variant	MODIFIER	-	-	5.768	0.430987	MICB(rs2855812)	0.447	CEU
rs3130612	6:31514320-31514320	G	upstream_gene_variant	MODIFIER	-	-	5.768	0.430987	MICB(rs2855812)	0.447	CEU
rs3130612	6:31514320-31514320	G	downstream_gene_variant	MODIFIER	-	-	5.768	0.430987	MICB(rs2855812)	0.447	CEU
